# Supplementary material for: Synthetic Study toward Triterpenes from the Schisandraceae Family of Natural Products
Source: MDPI journal article supplement (doi:10.3390/molecules28114468), 2023-05-31

# Supporting Information

NMR spectra of novel compounds

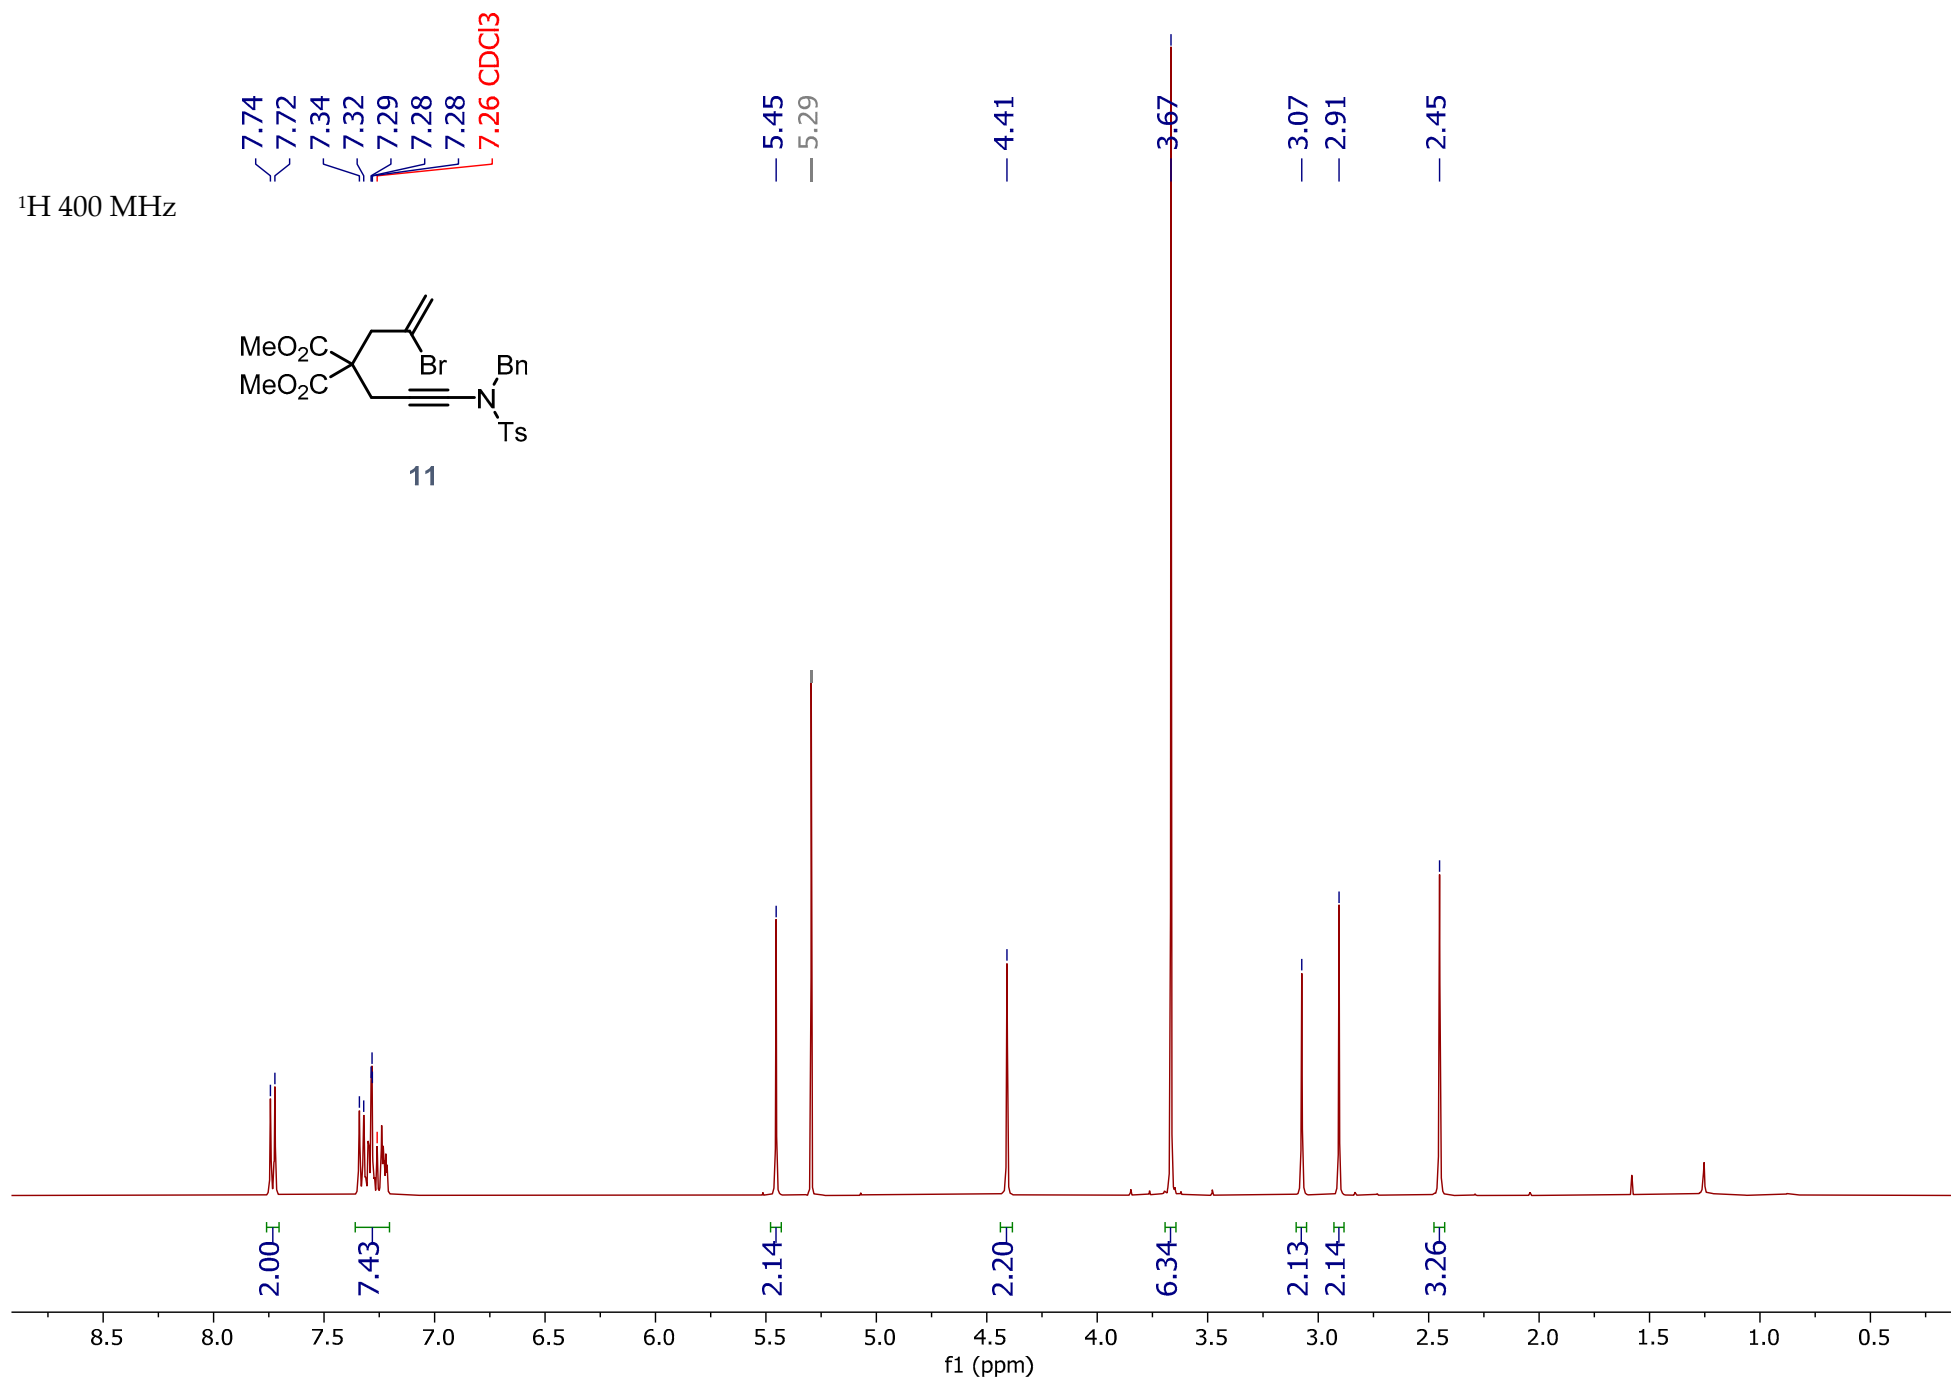

<sup>13</sup>C 101 MHz

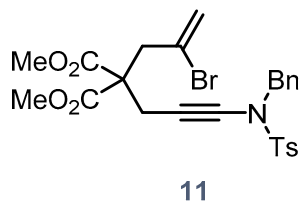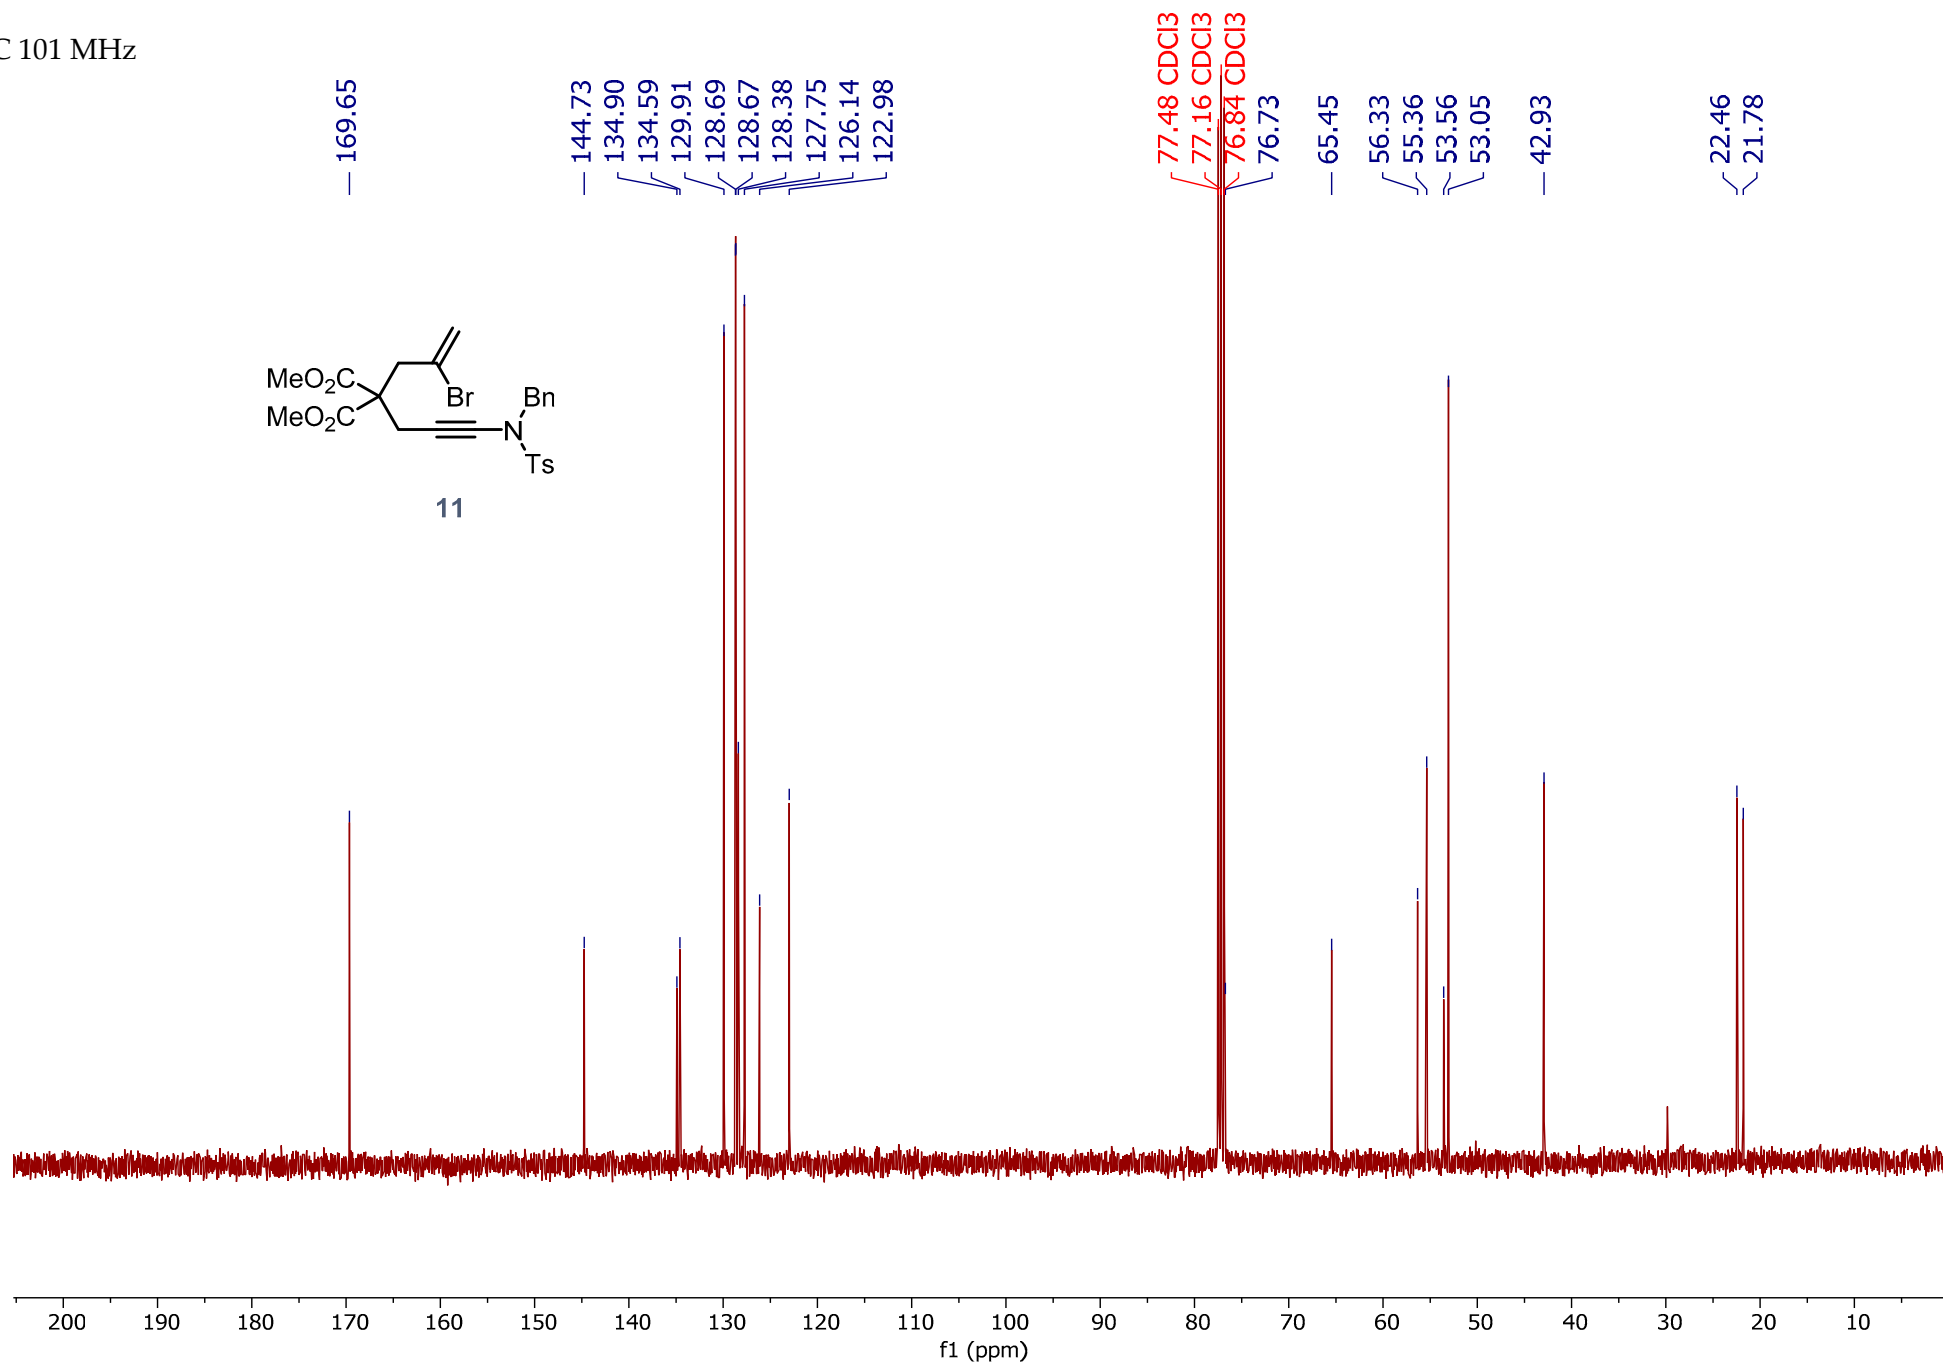

$^1\text{H}$  200 MHz

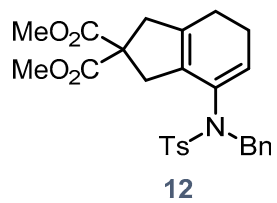

7.72  
7.68  
7.32  
7.27  
7.26 CDCl<sub>3</sub>

5.30  
5.15  
5.13  
5.10

4.42

3.69

2.96  
2.87

2.44

2.19

2.17

2.12

2.07

2.02

1.26

0.88

2.14

3.48

1.00

1.93

6.81

4.10

3.83

4.38

f1 (ppm)

$^1\text{H}$  400 MHz

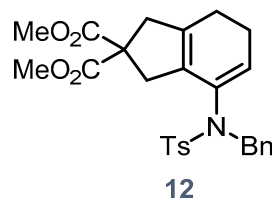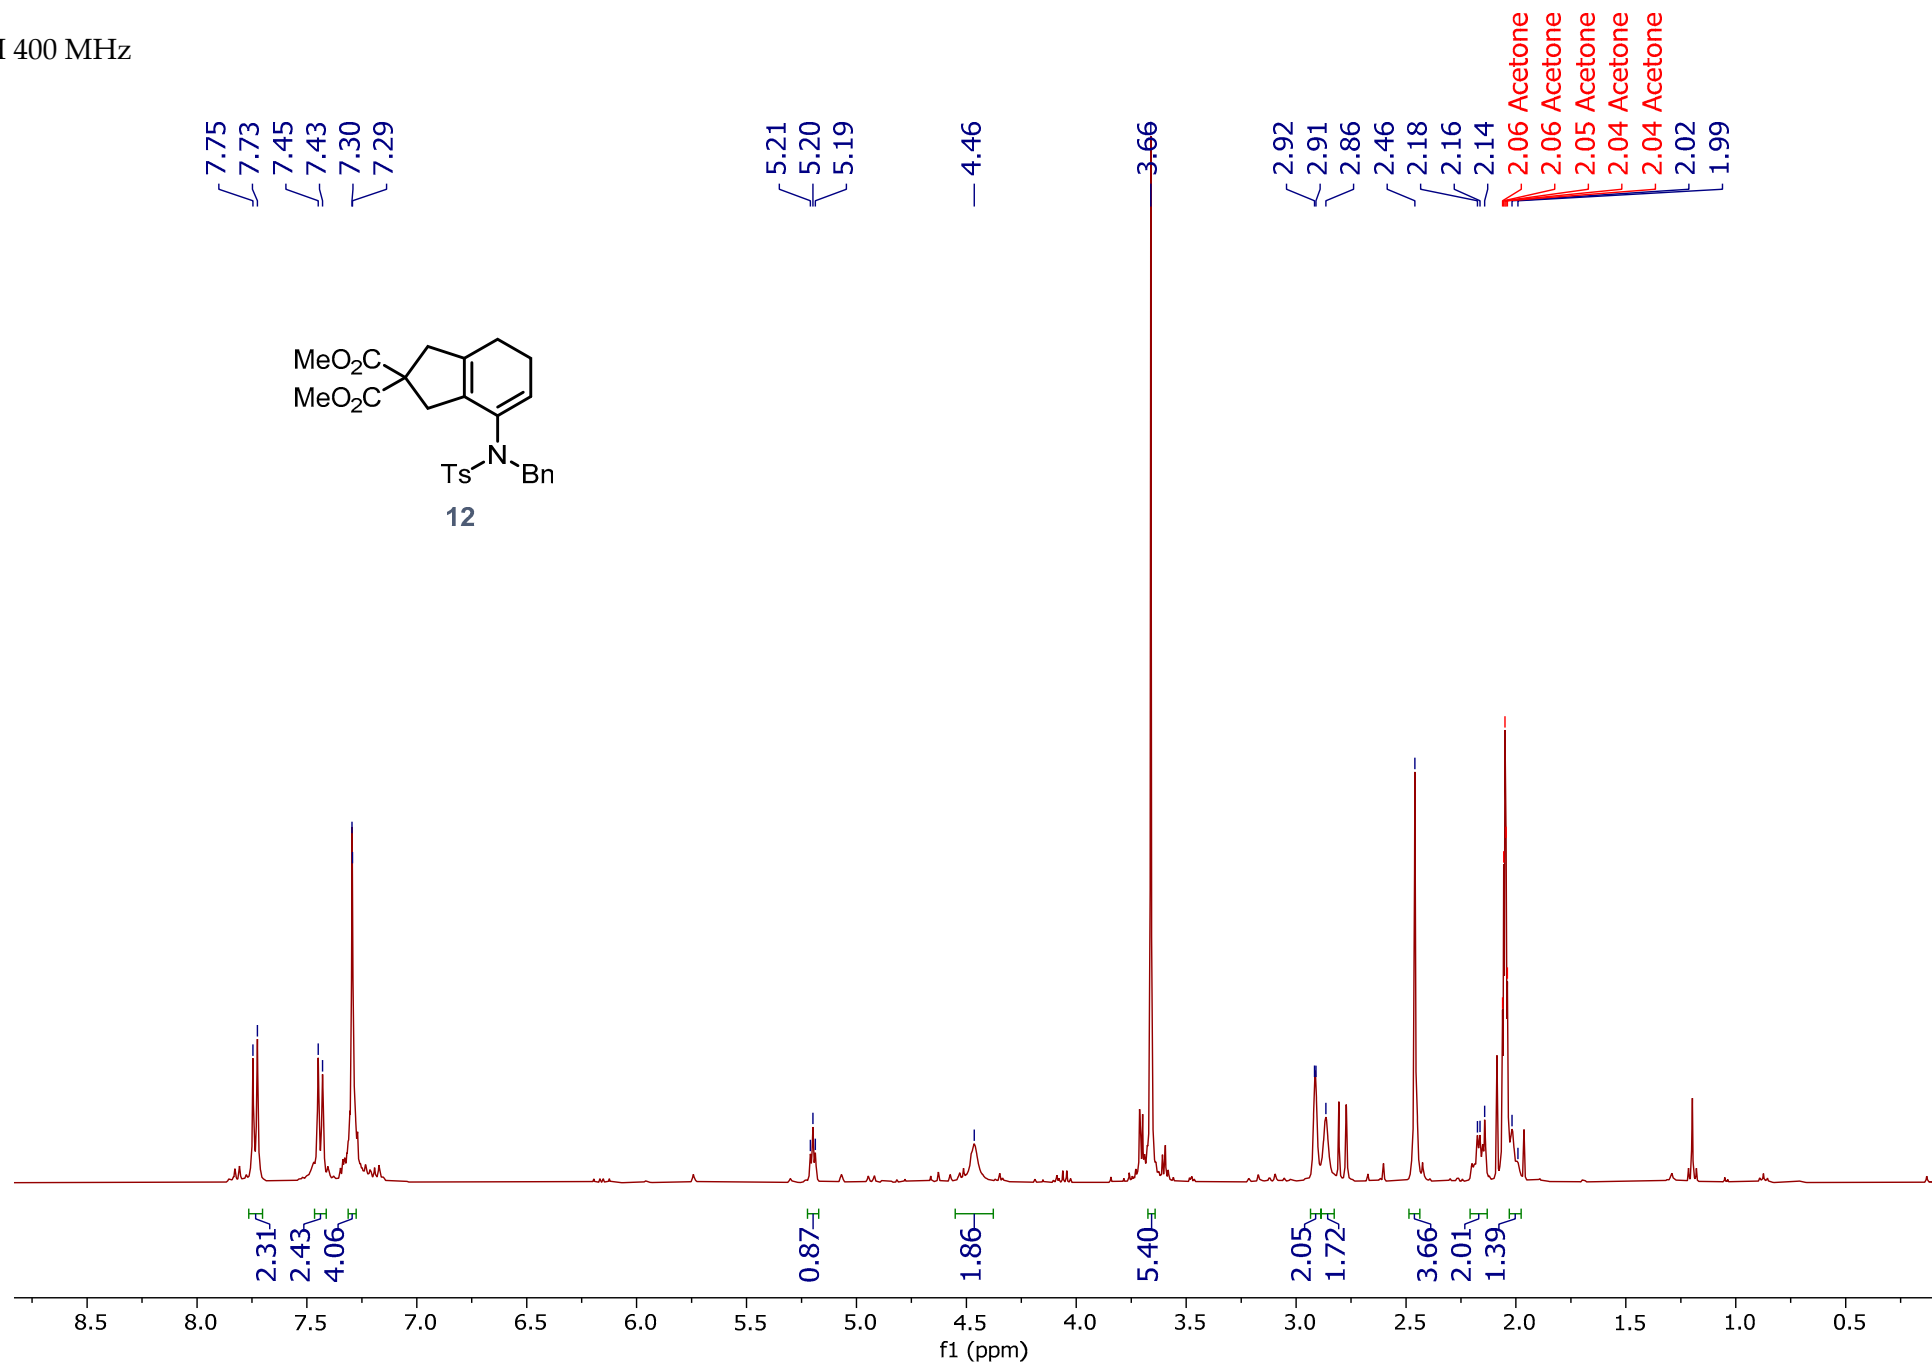

$^{13}\text{C}$  101 MHz

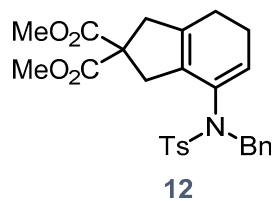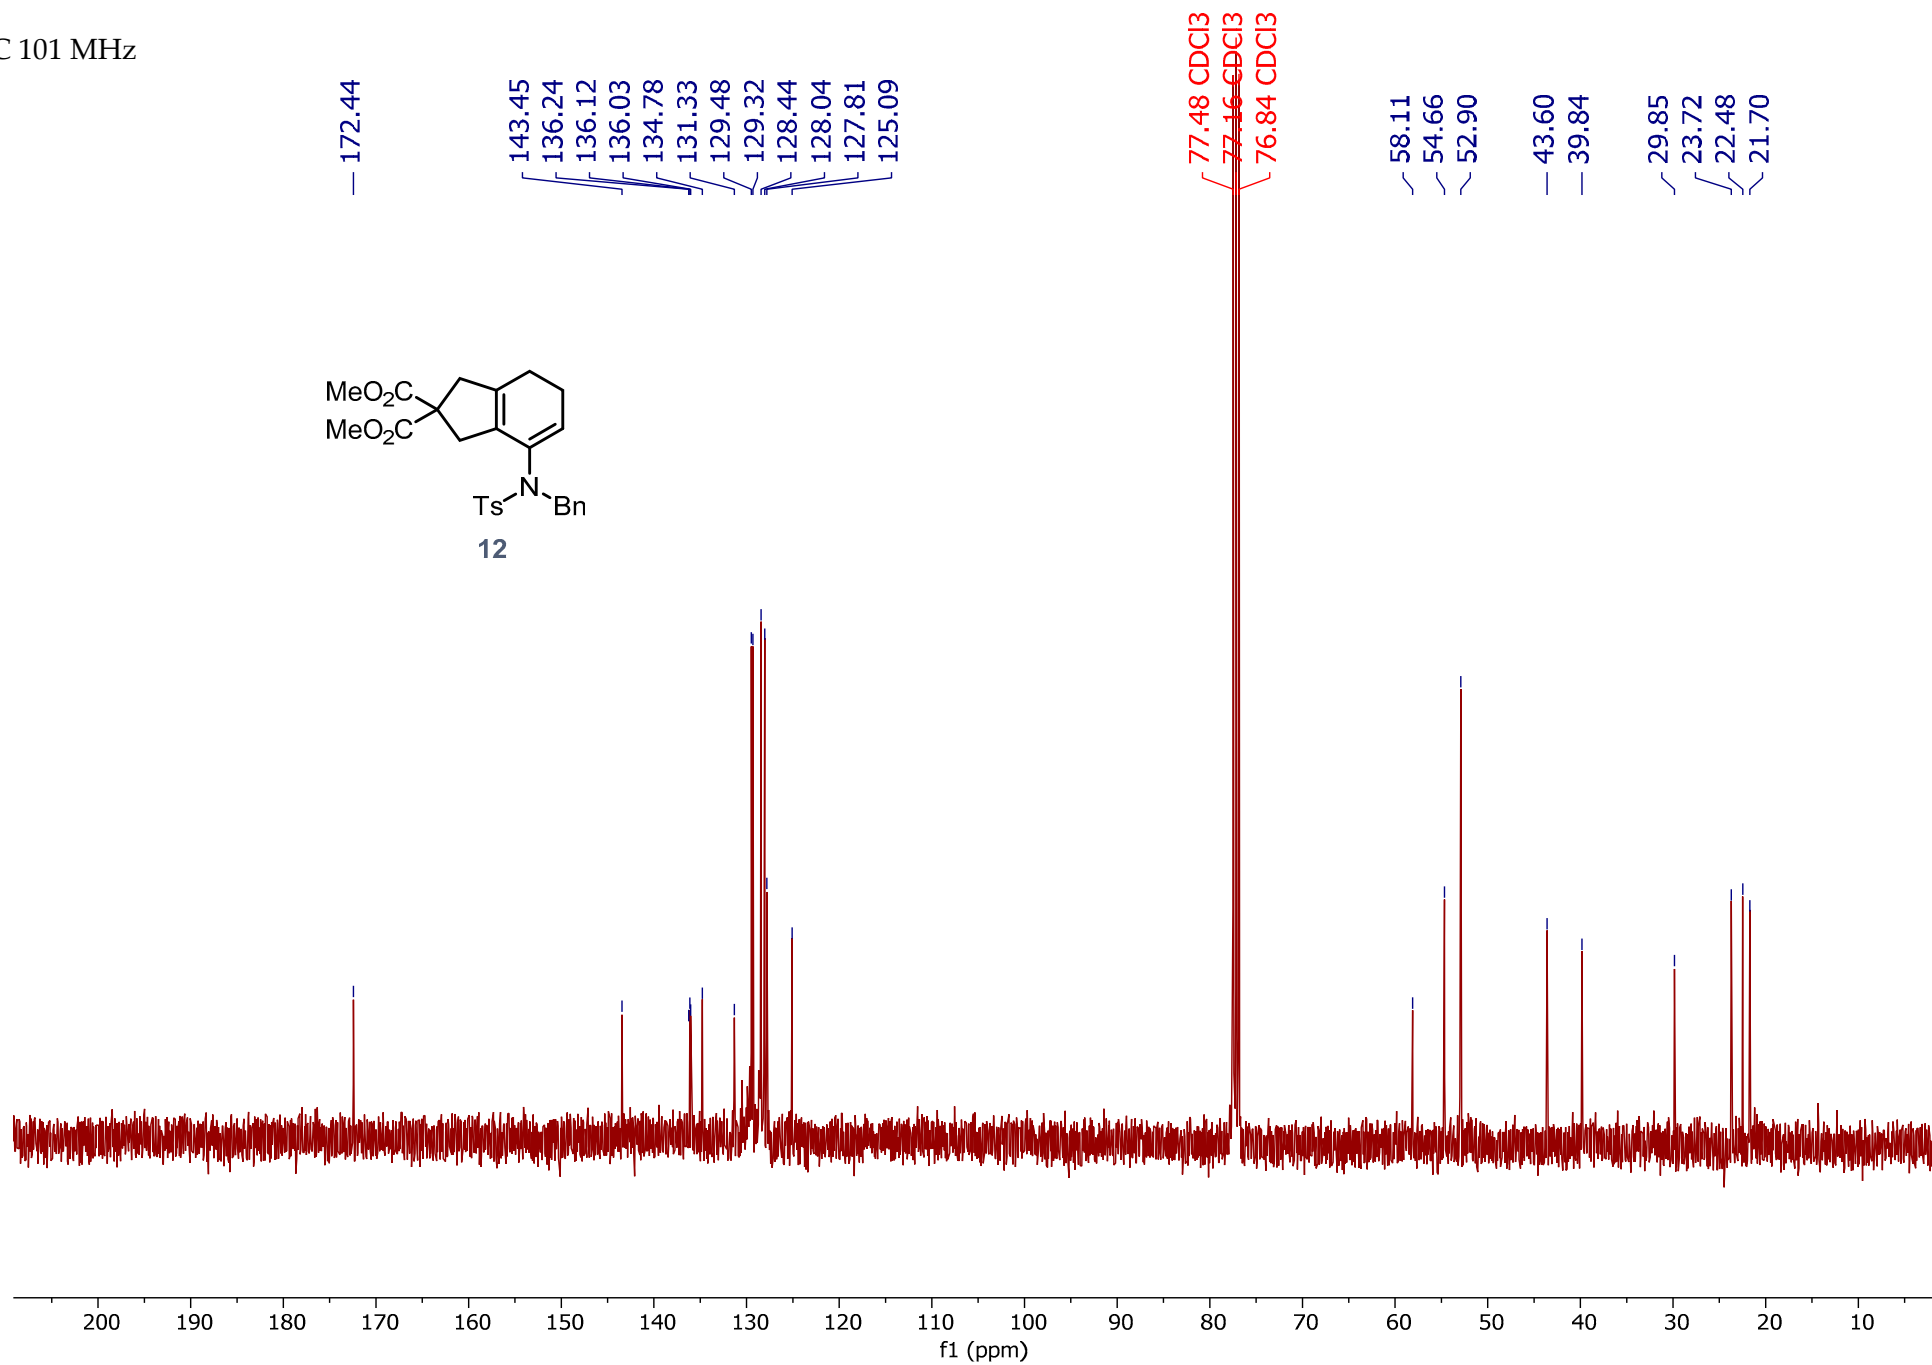

$^1\text{H}$  500 MHz

— 7.26 CDCl<sub>3</sub>

6.75  
6.72

5.37  
5.34  
5.06  
5.06  
5.06  
5.06  
5.05

— 1.96

— 1.56 H<sub>2</sub>O

1.29

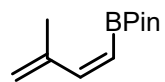

23

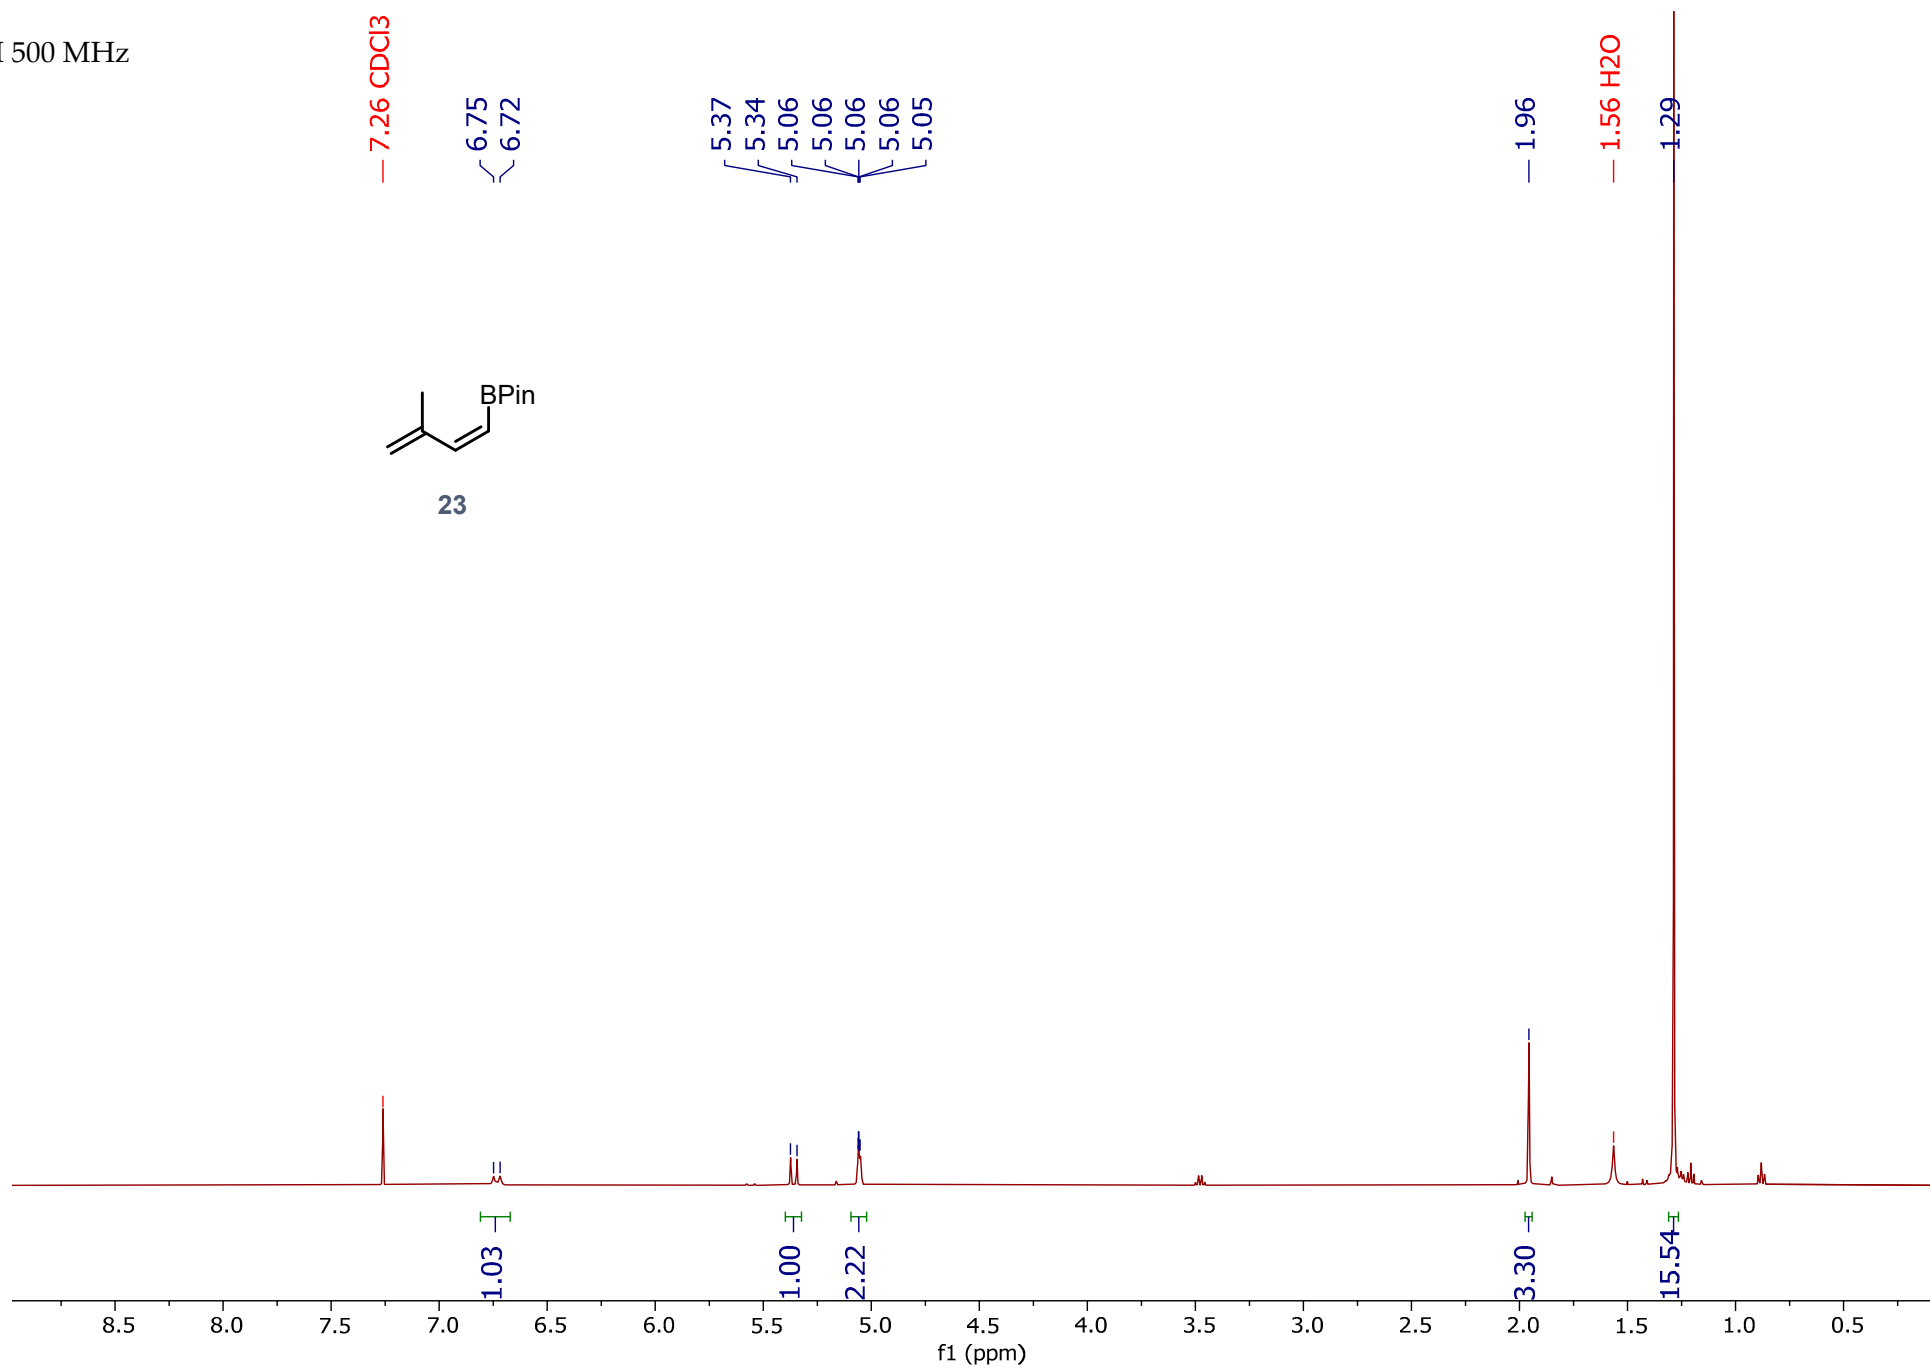

$^{13}\text{C}$  126 MHz

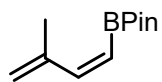

23

— 148.65  
— 144.04

— 119.21

83.66  
77.41 CDCl<sub>3</sub>  
77.16 CDCl<sub>3</sub>  
76.91 CDCl<sub>3</sub>

— 24.94  
— 20.46

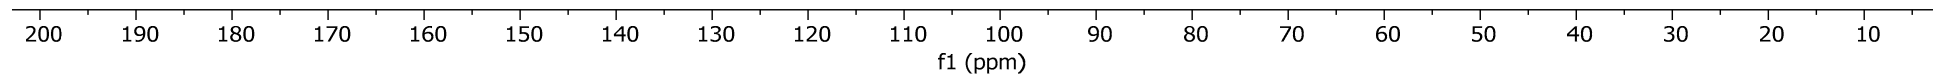



<sup>1</sup>H 400 MHz

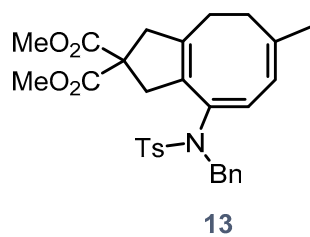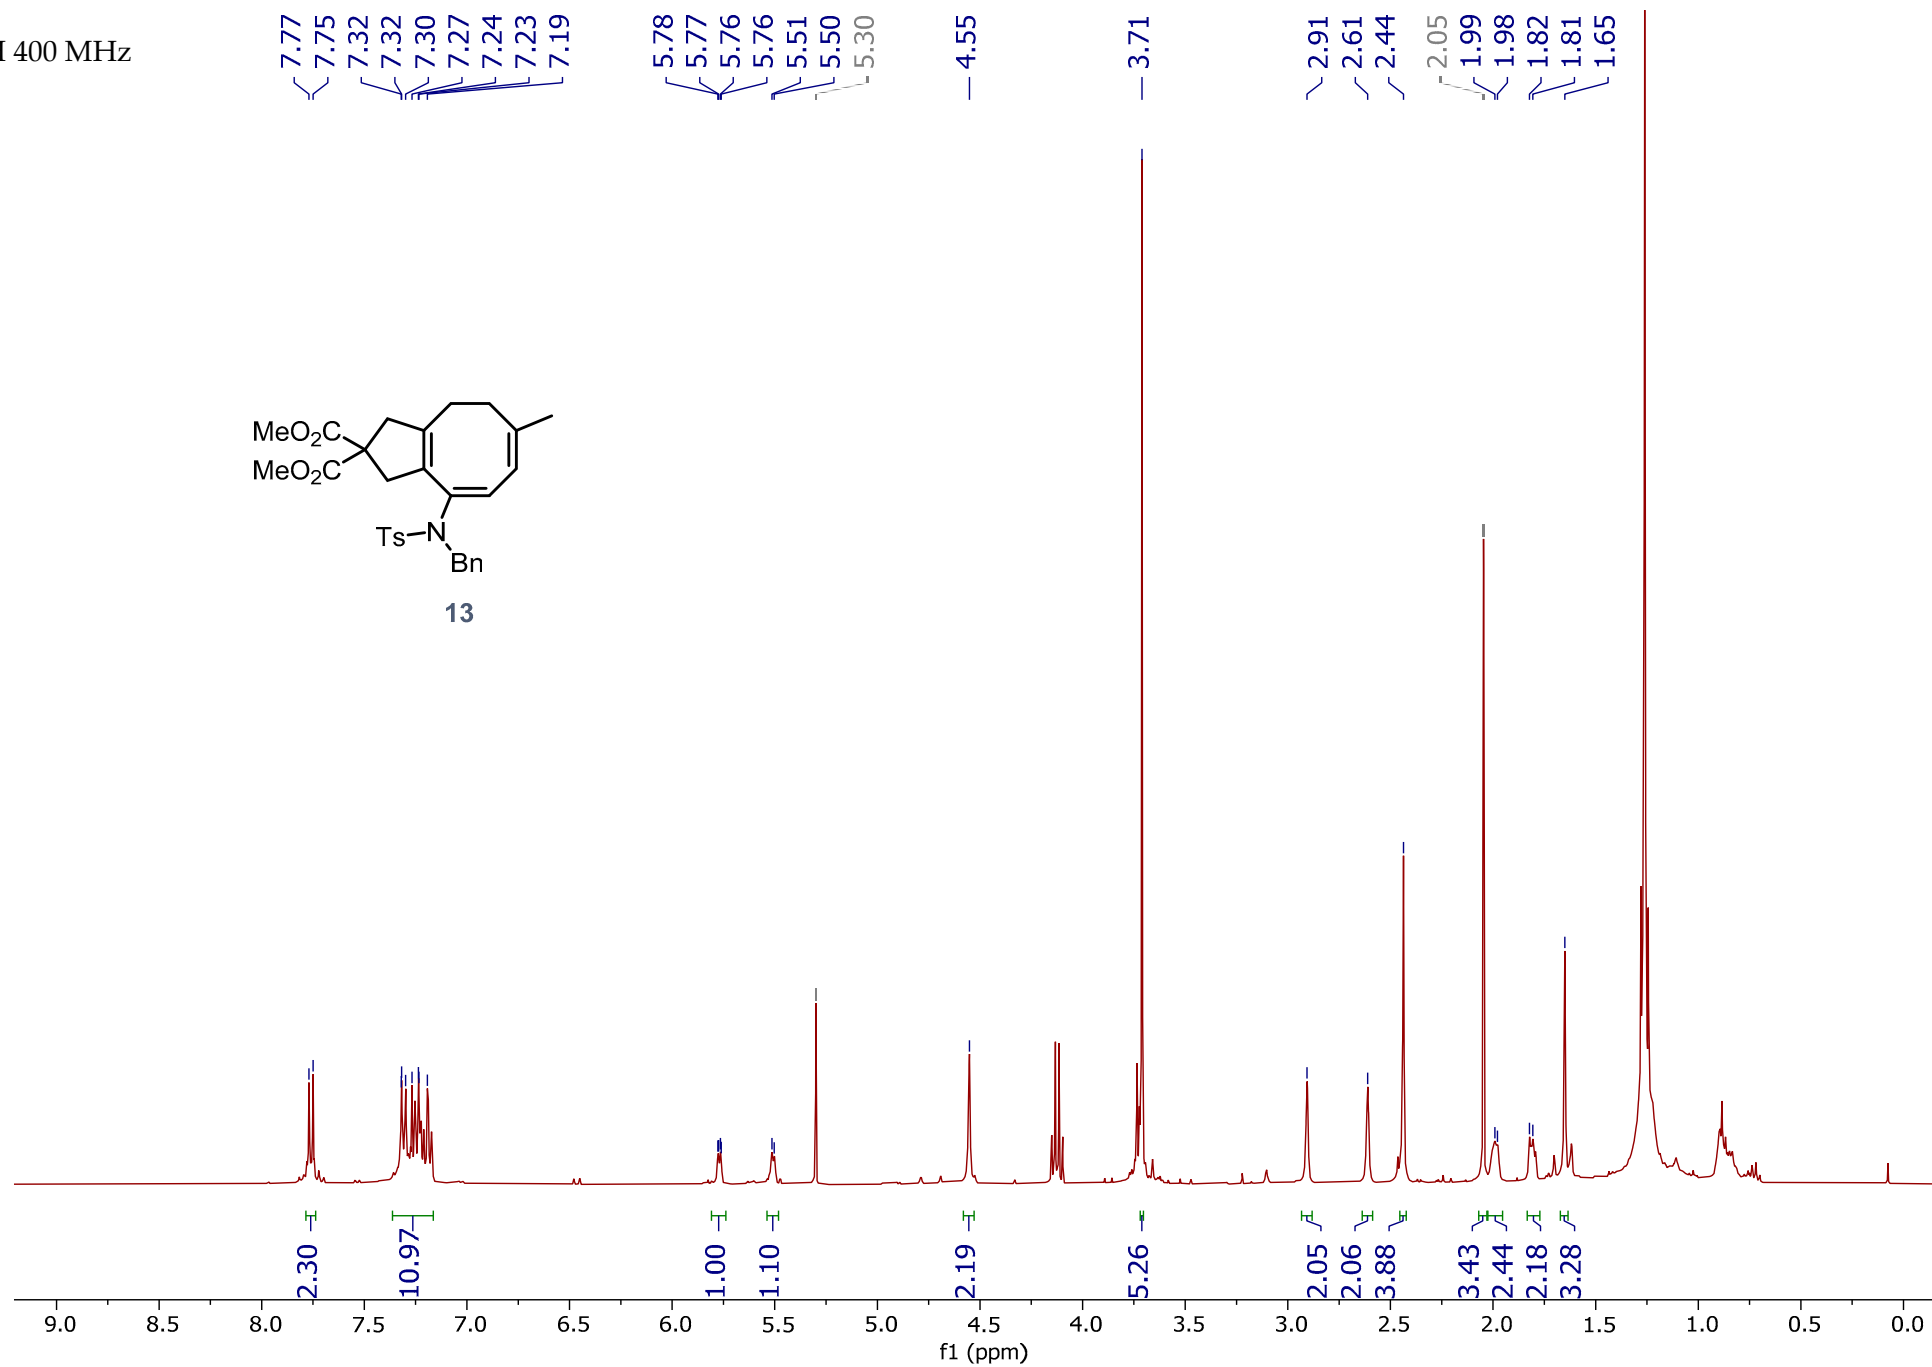

<sup>13</sup>C 101 MHz

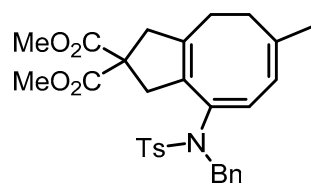

13

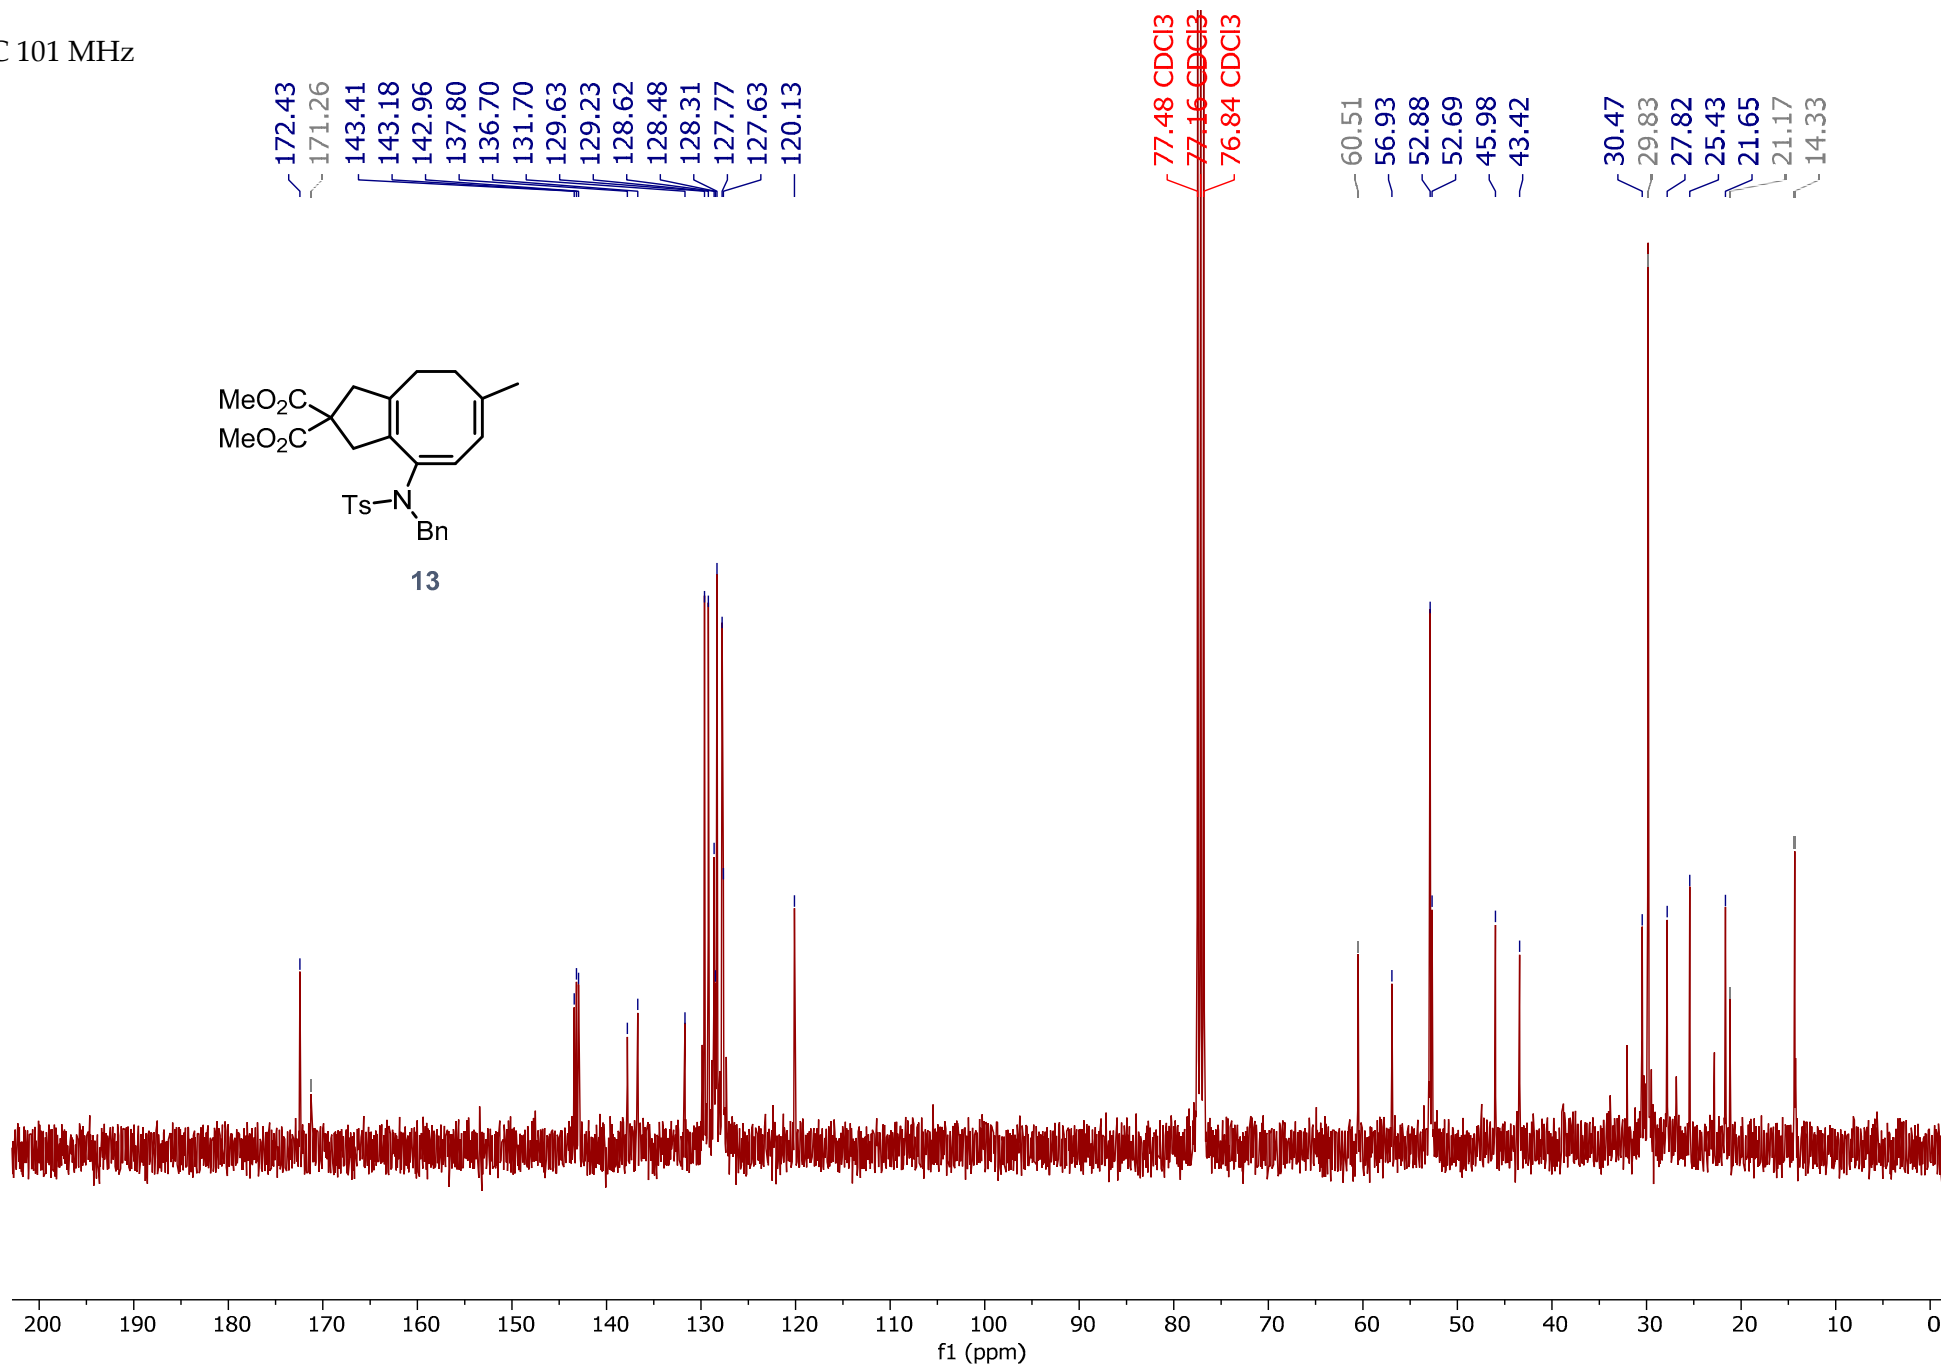

<sup>1</sup>H 400 MHz

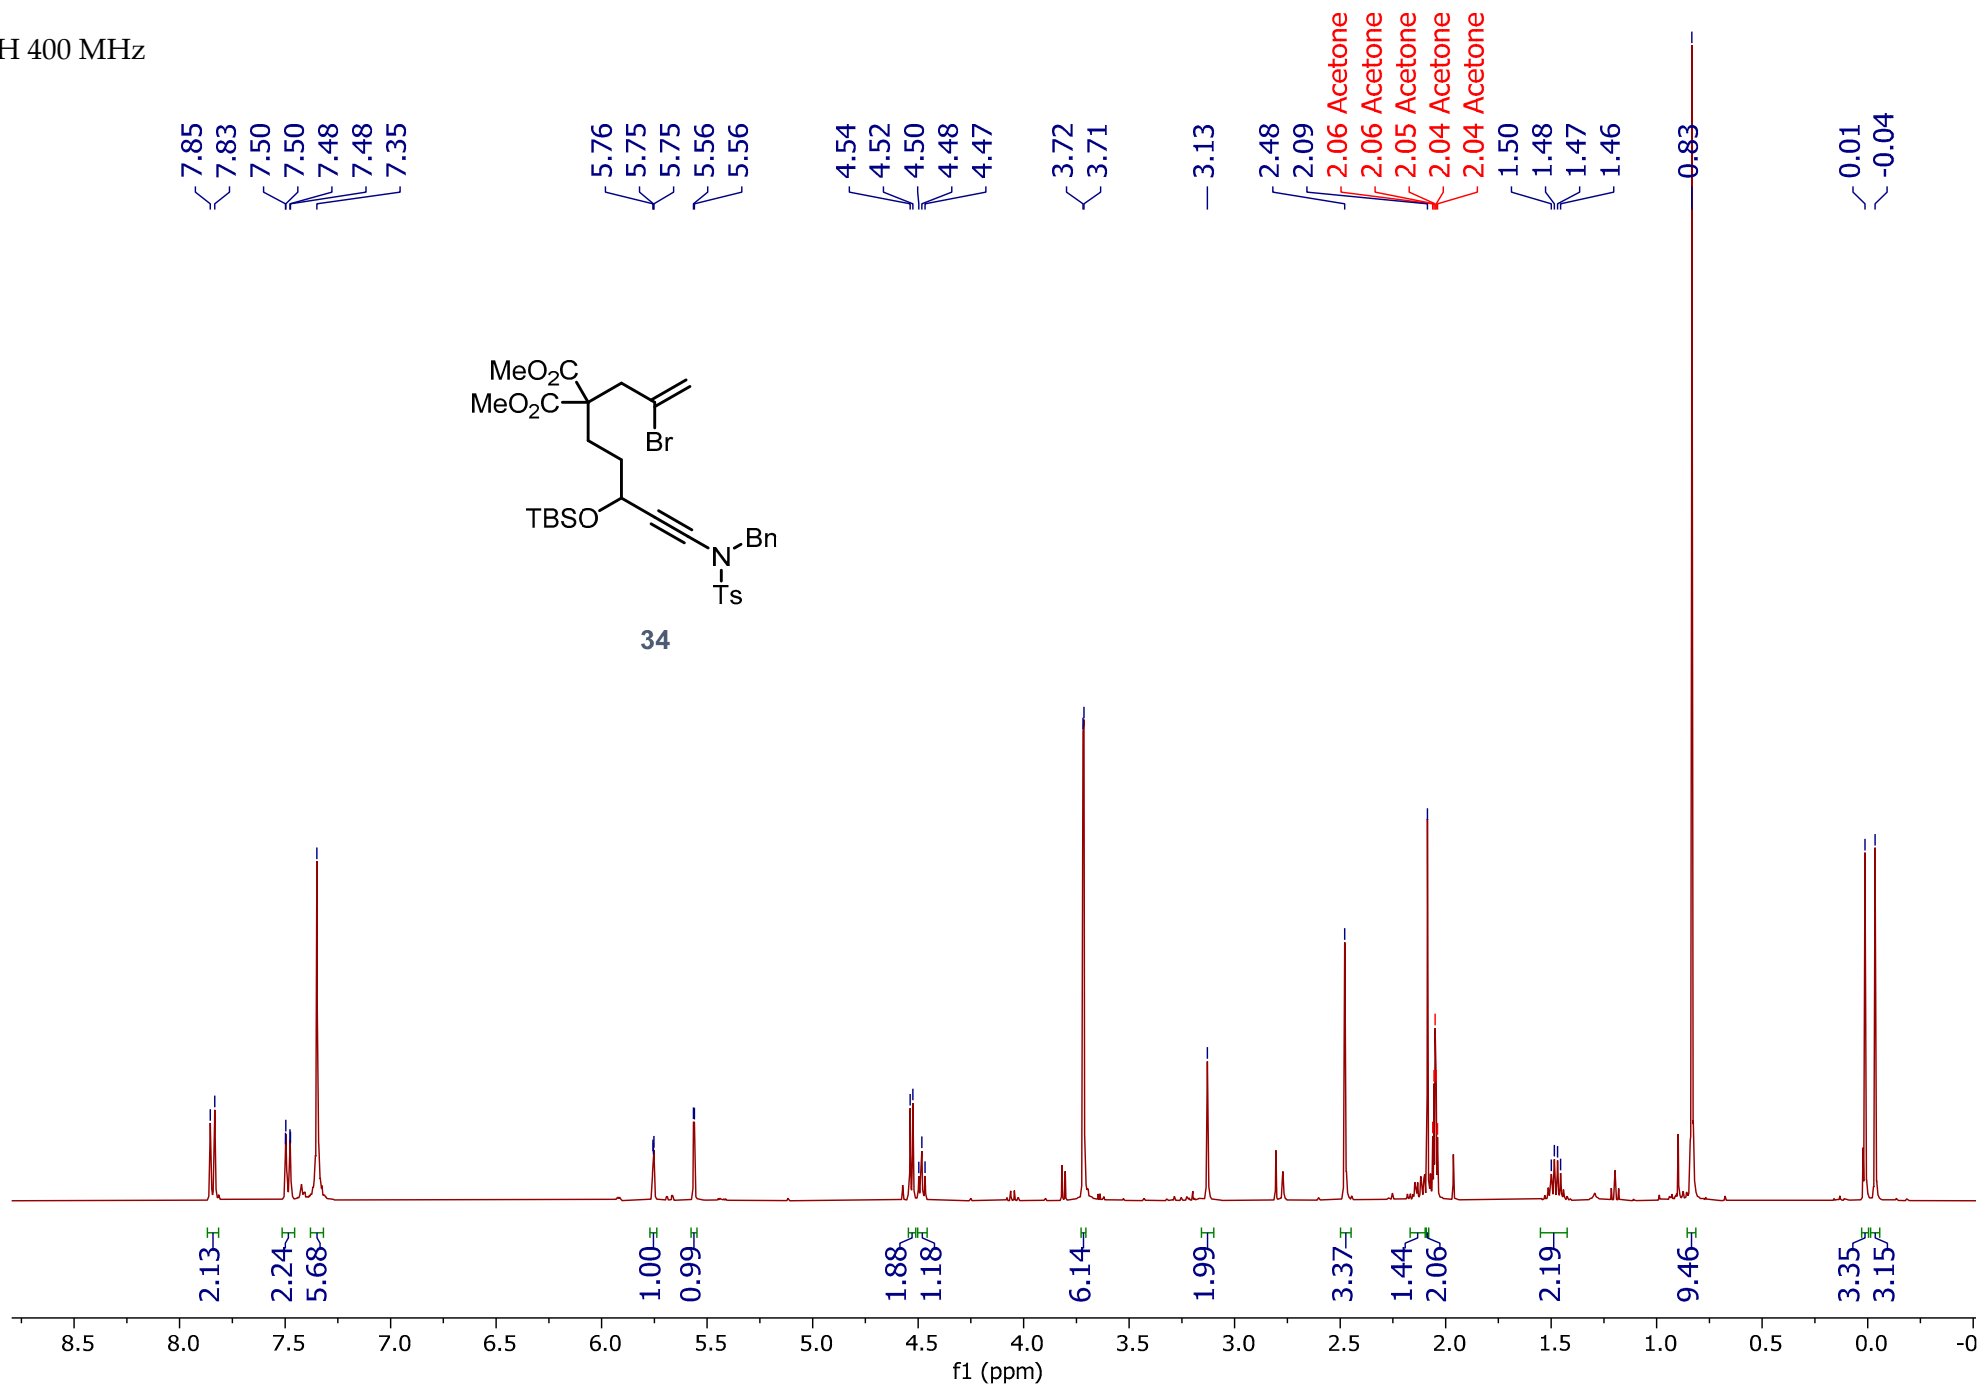

$^{13}\text{C}$  101 MHz

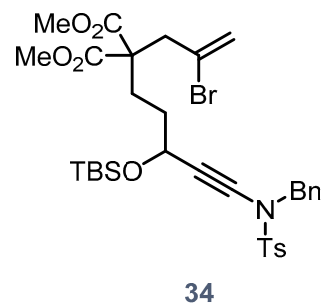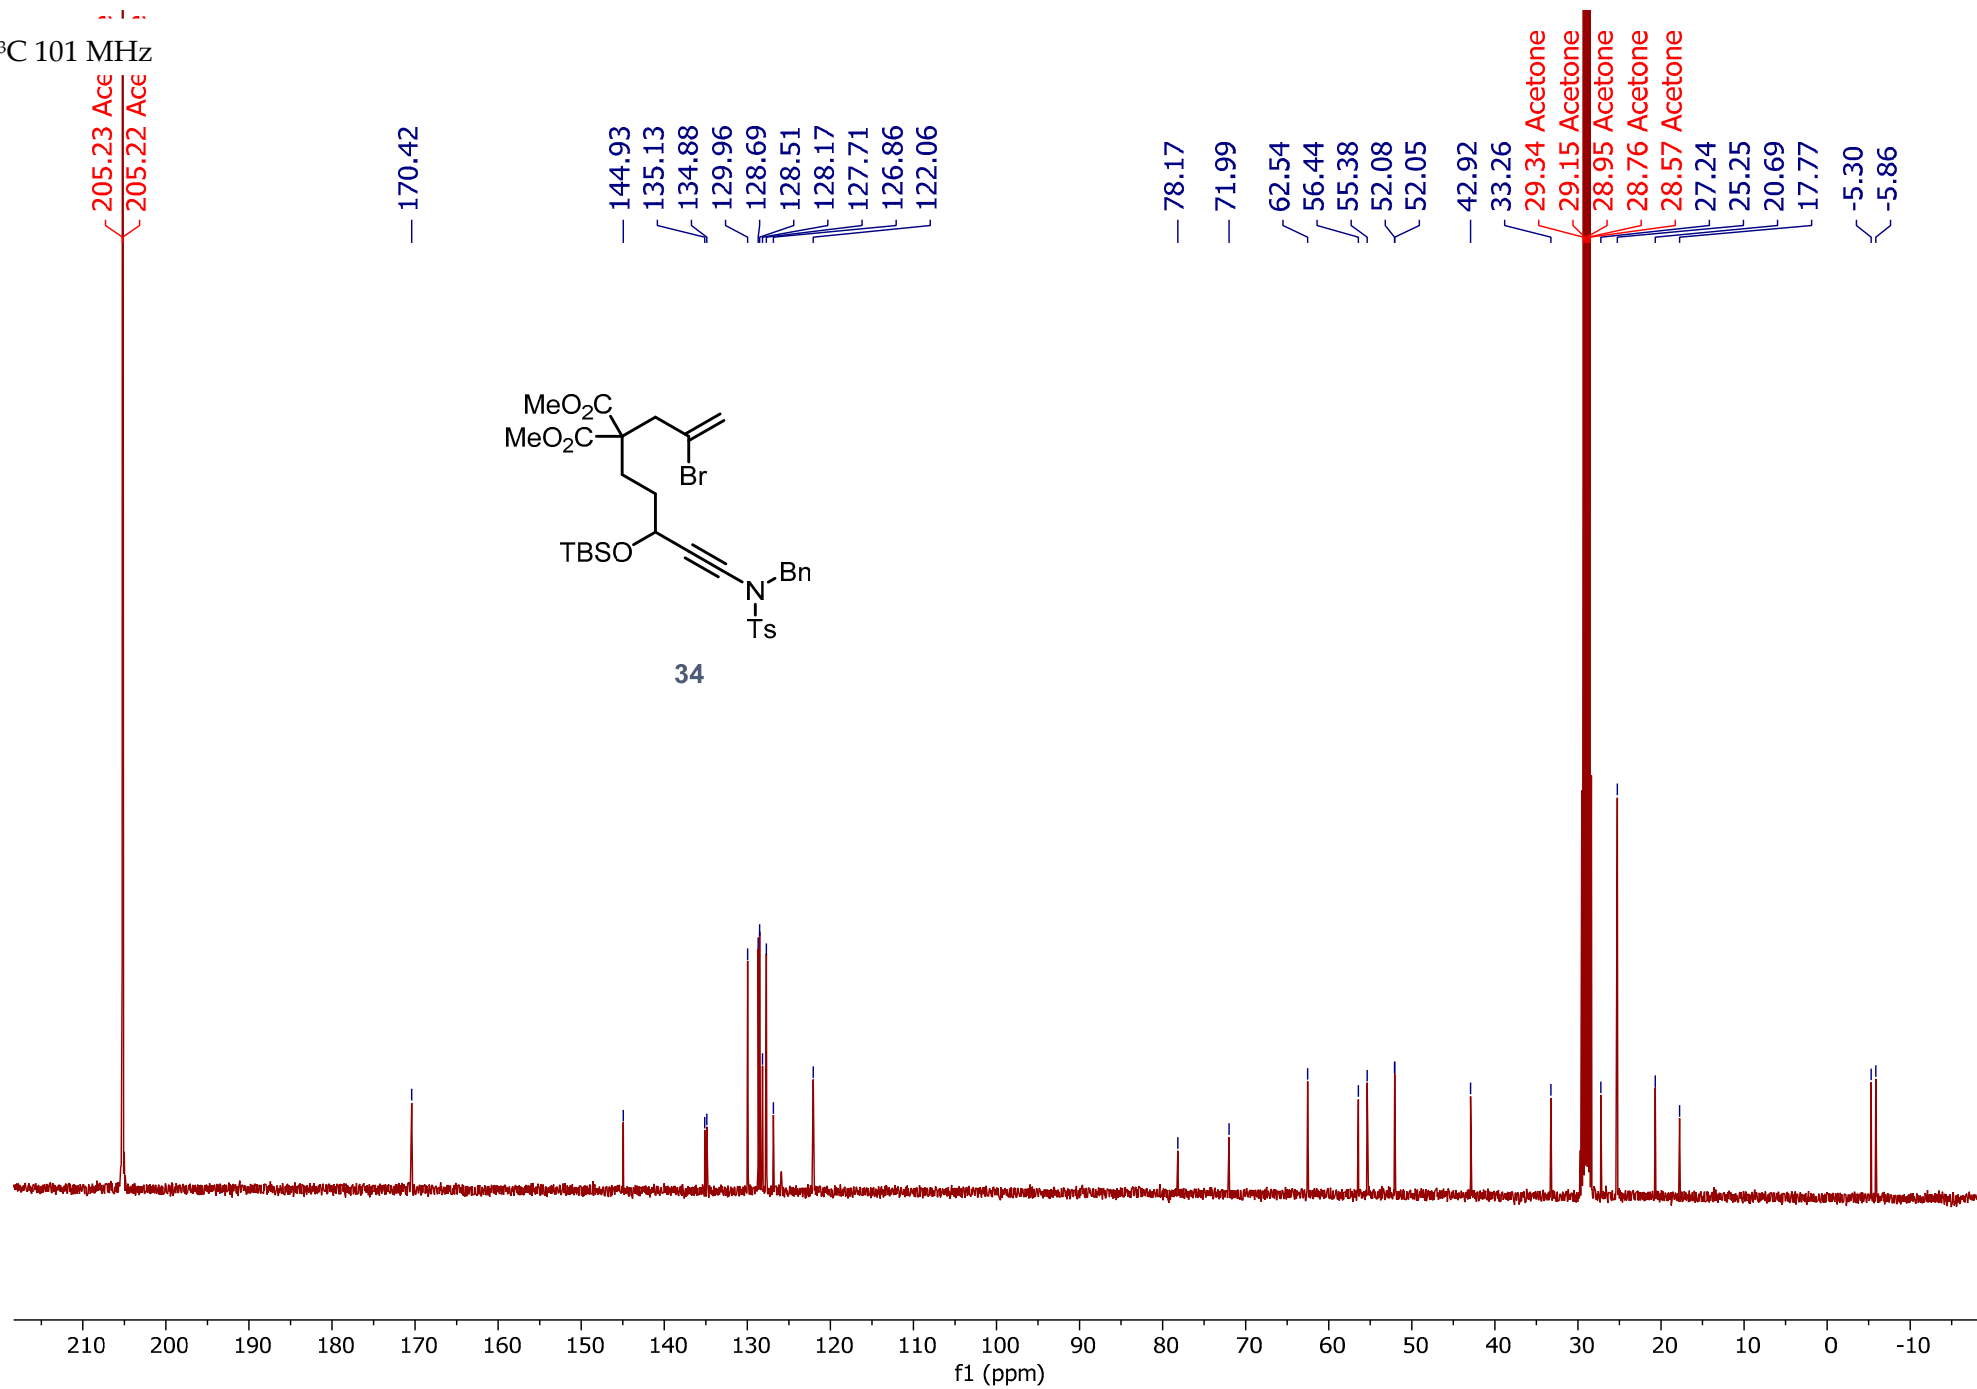

$^1\text{H}$  400 MHz

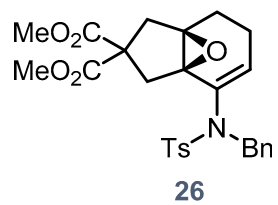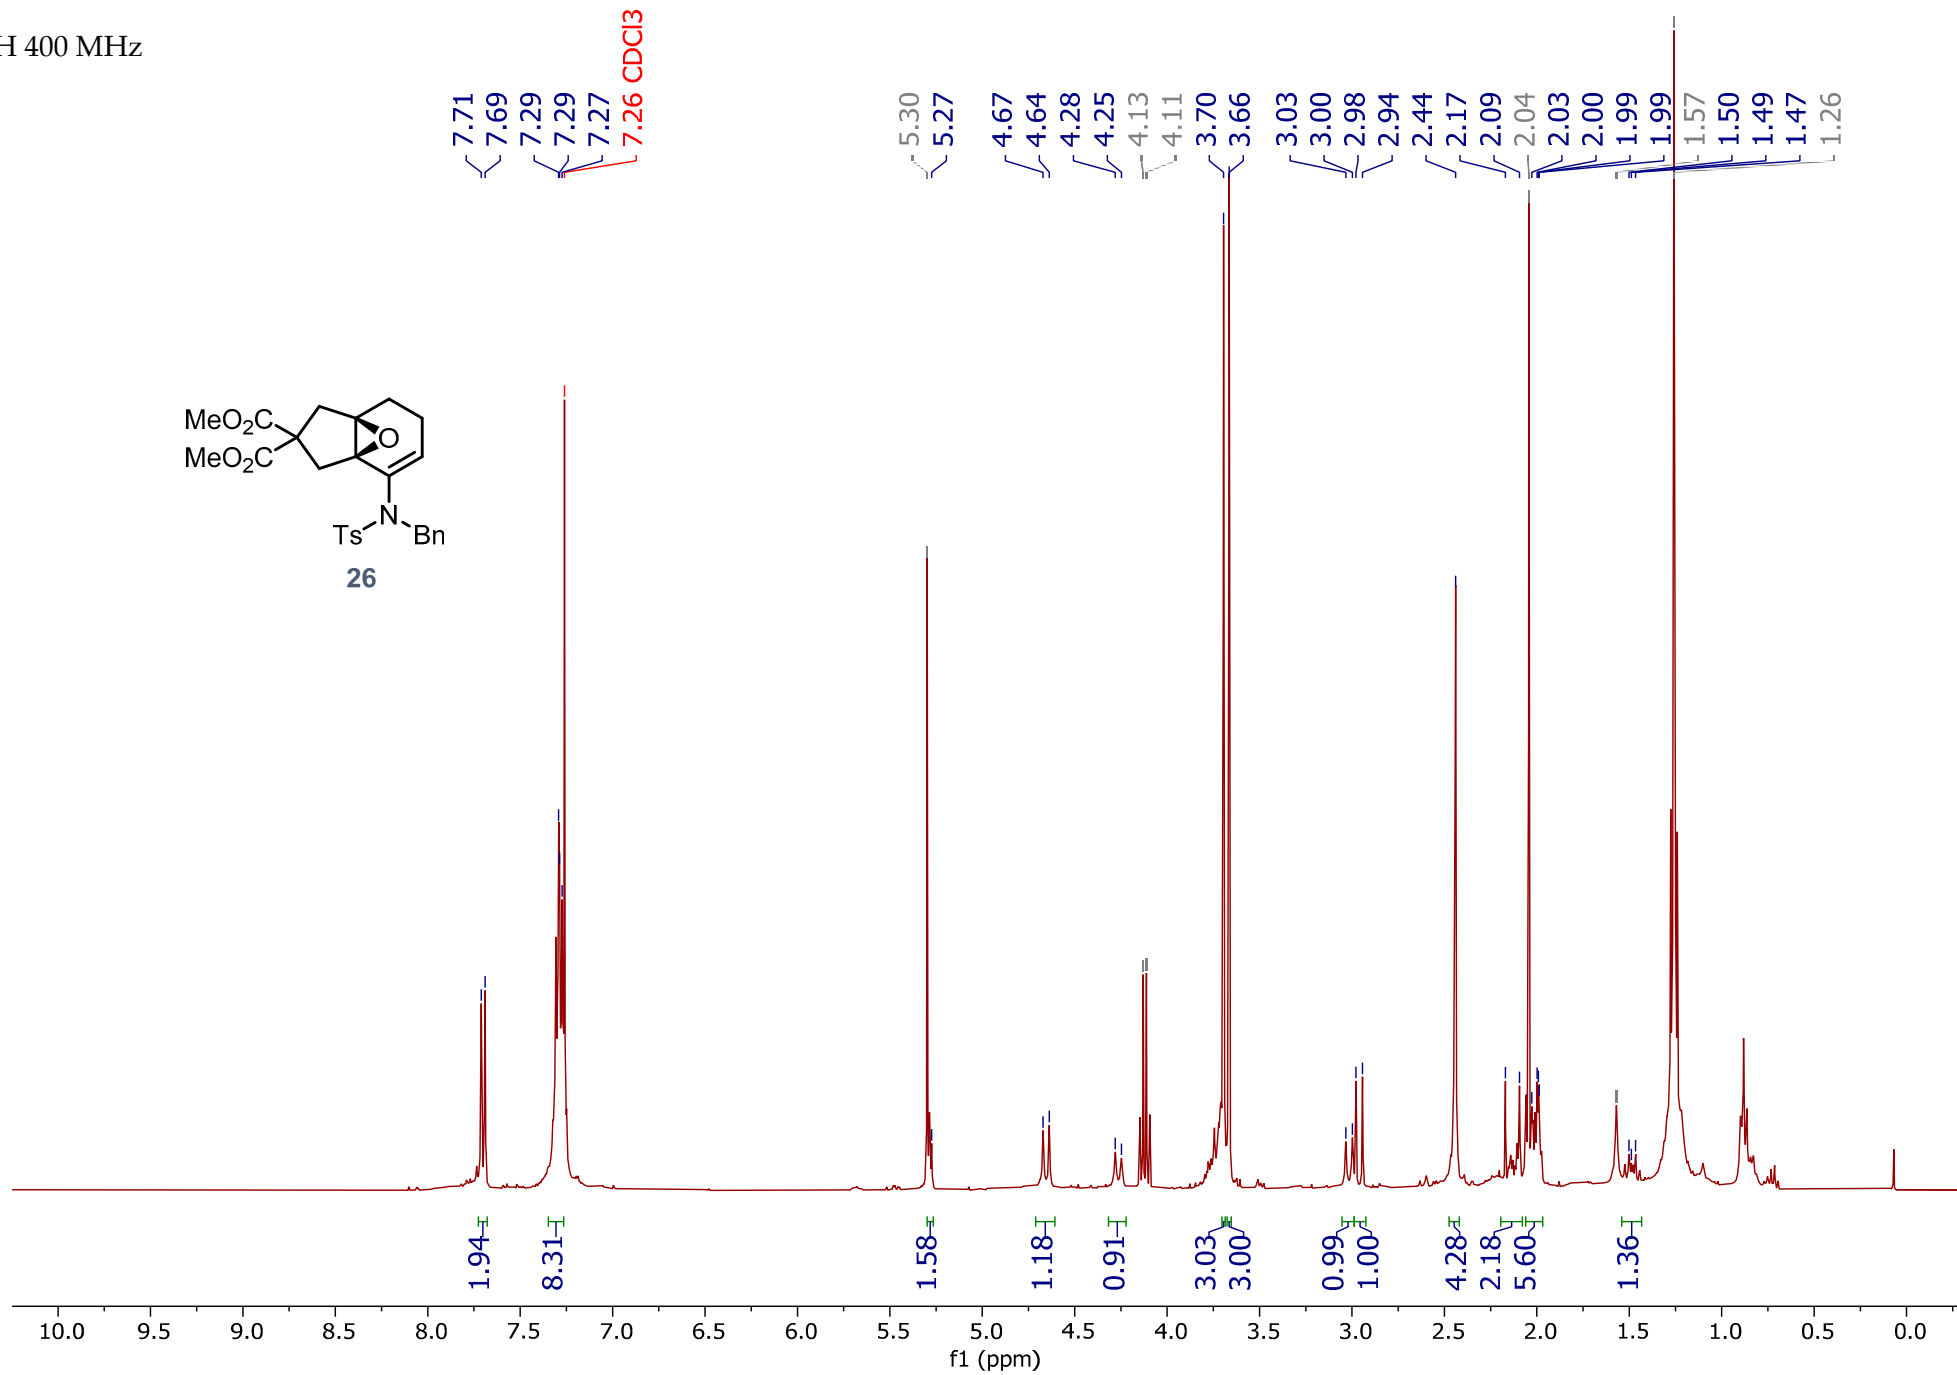

<sup>13</sup>C 126 MHz

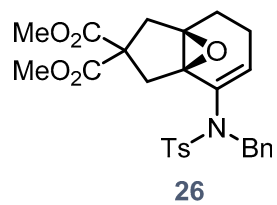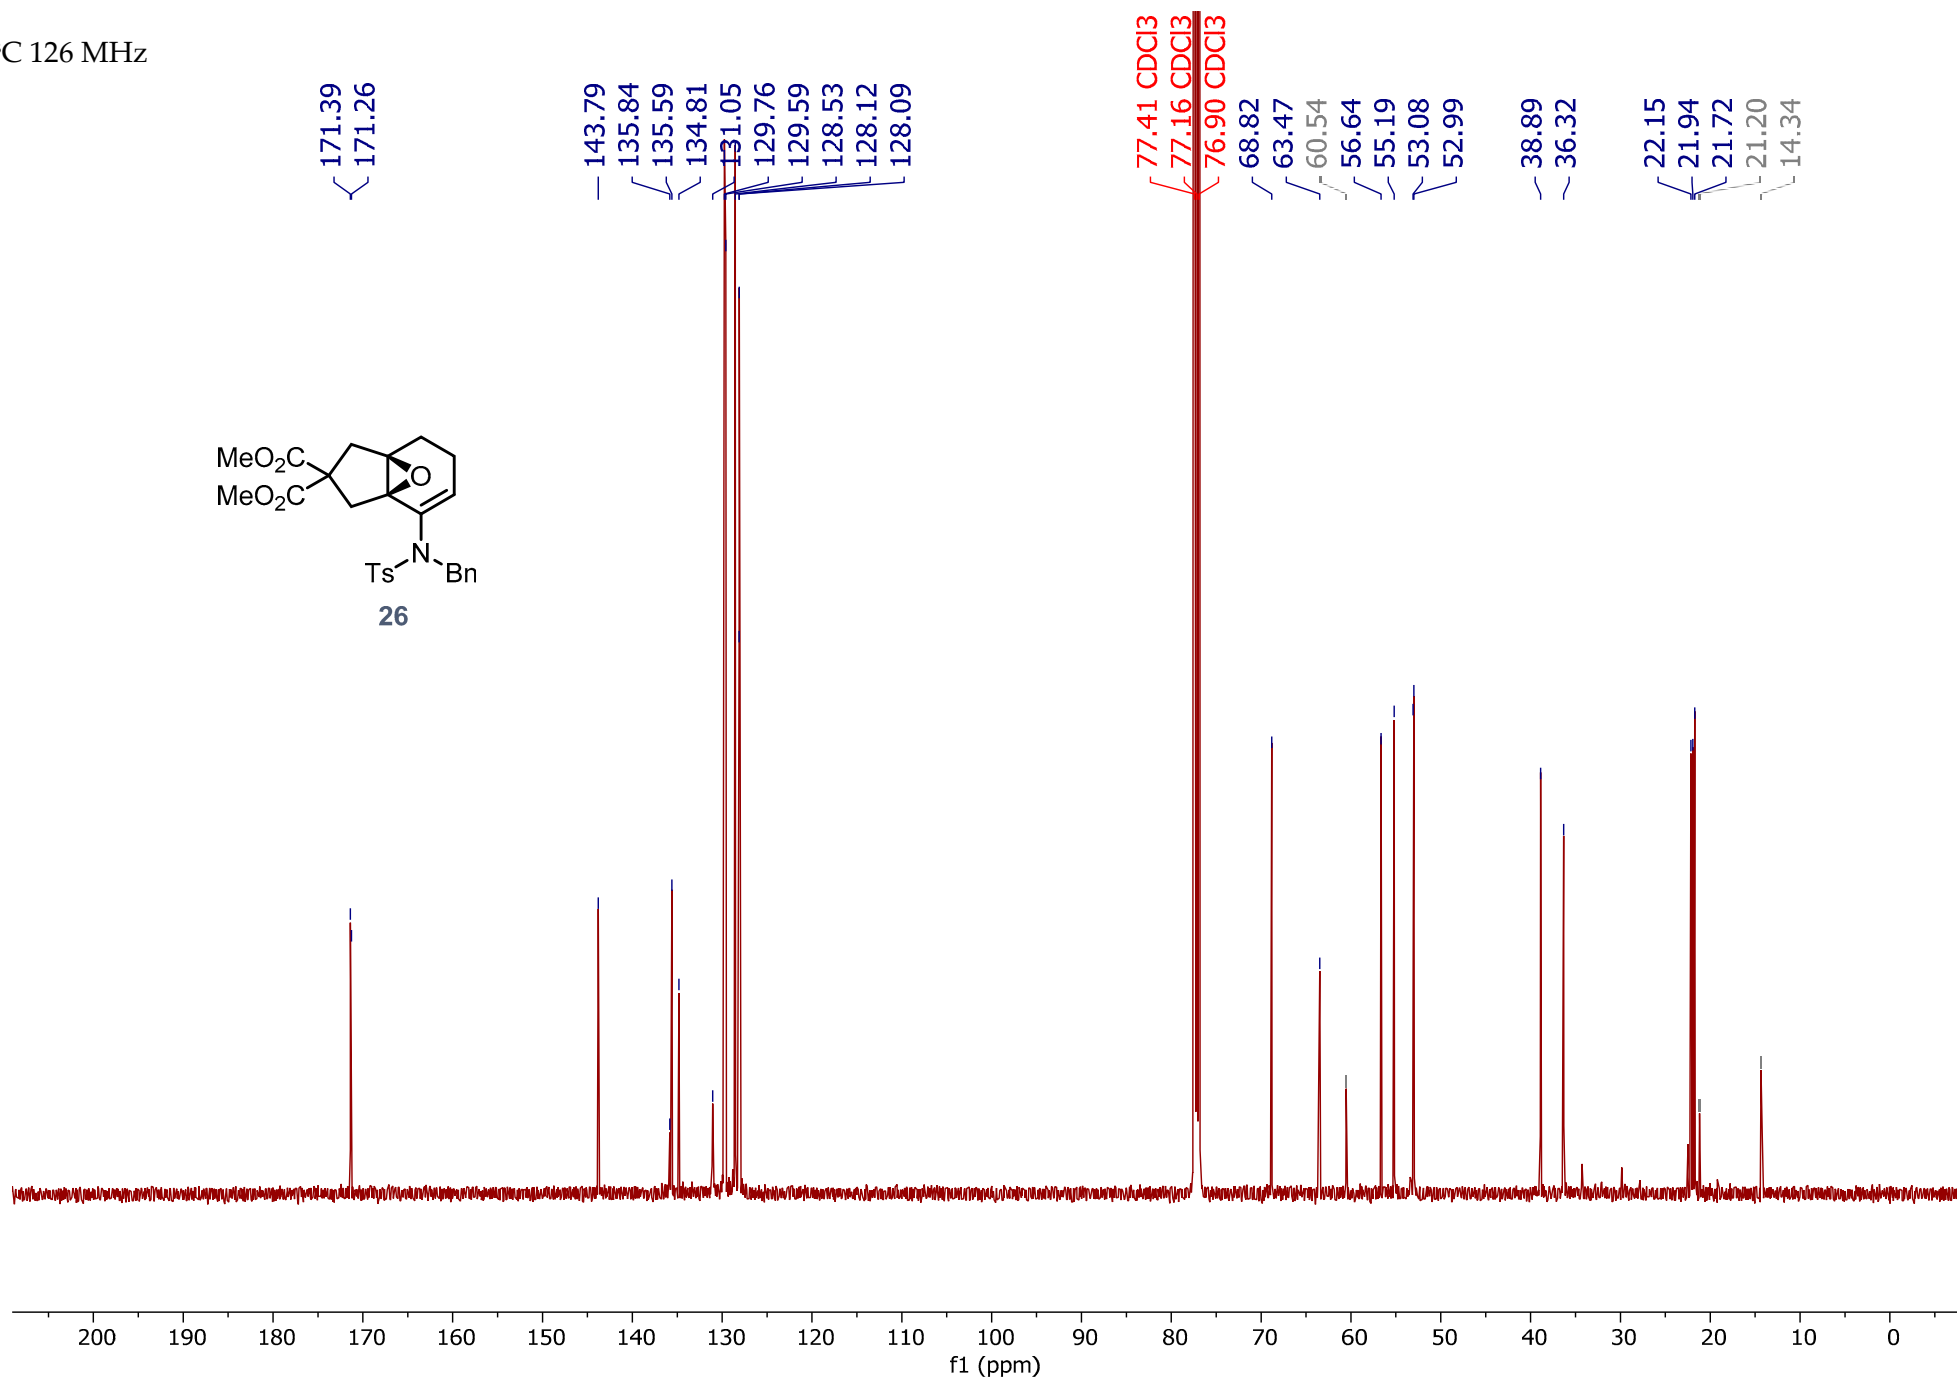

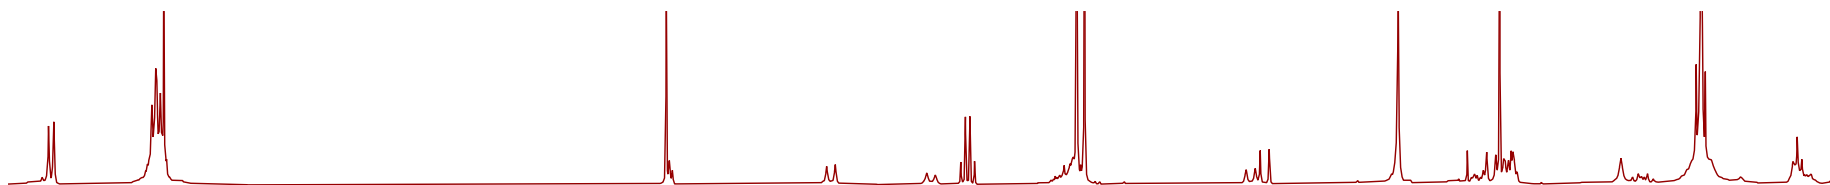

<sup>13</sup>C edited-HSQC

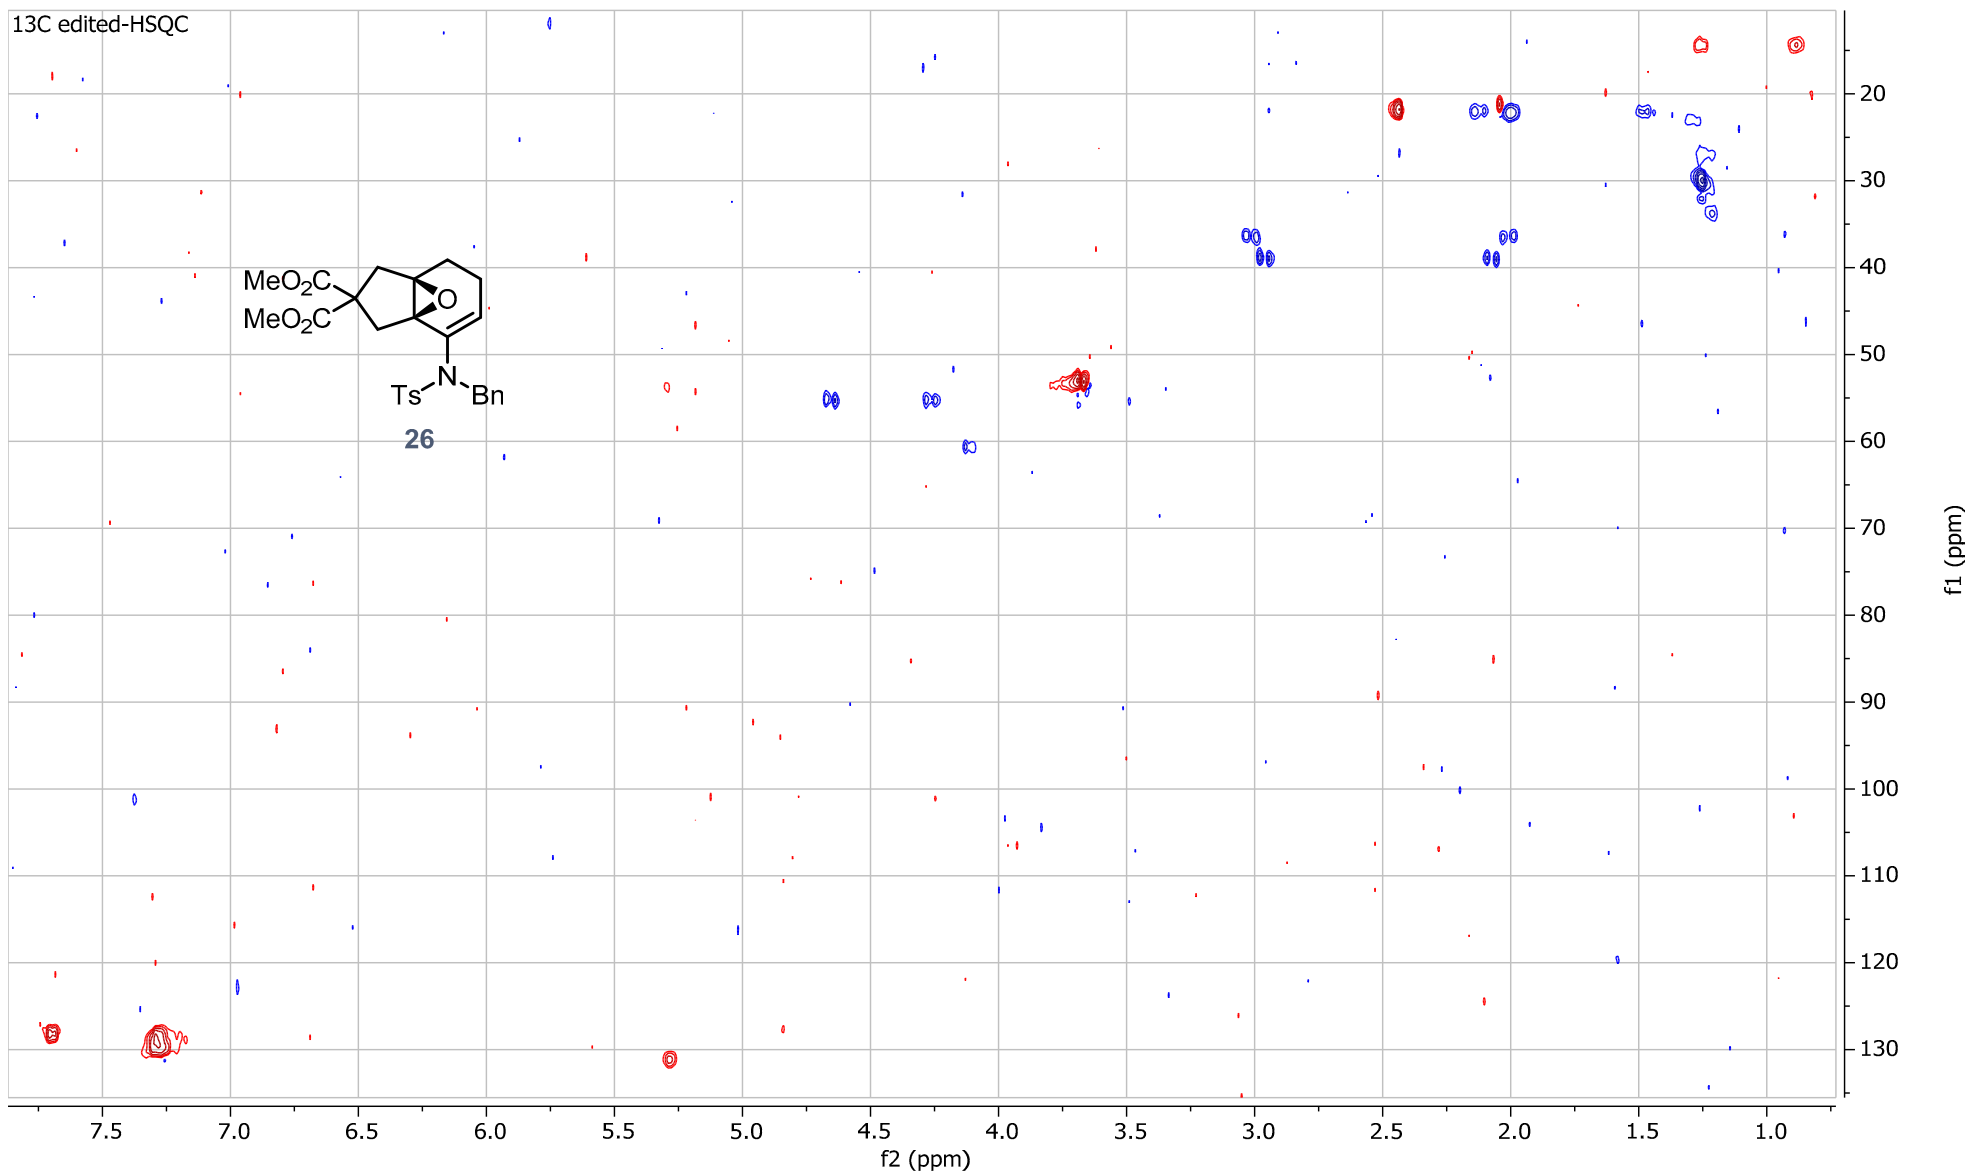

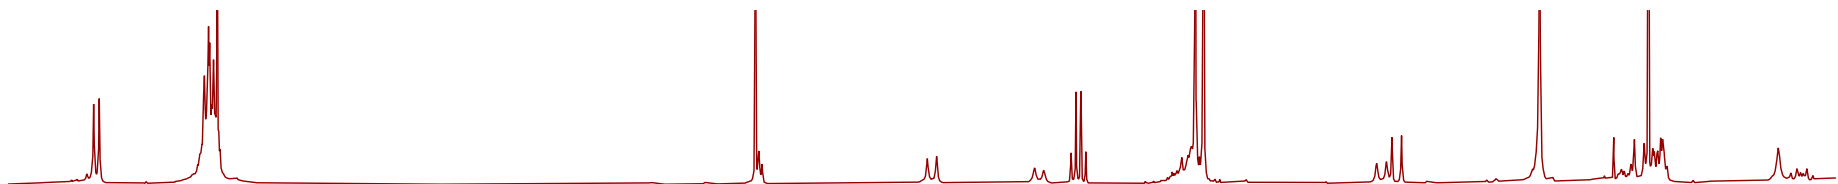

1H-13C HMBC

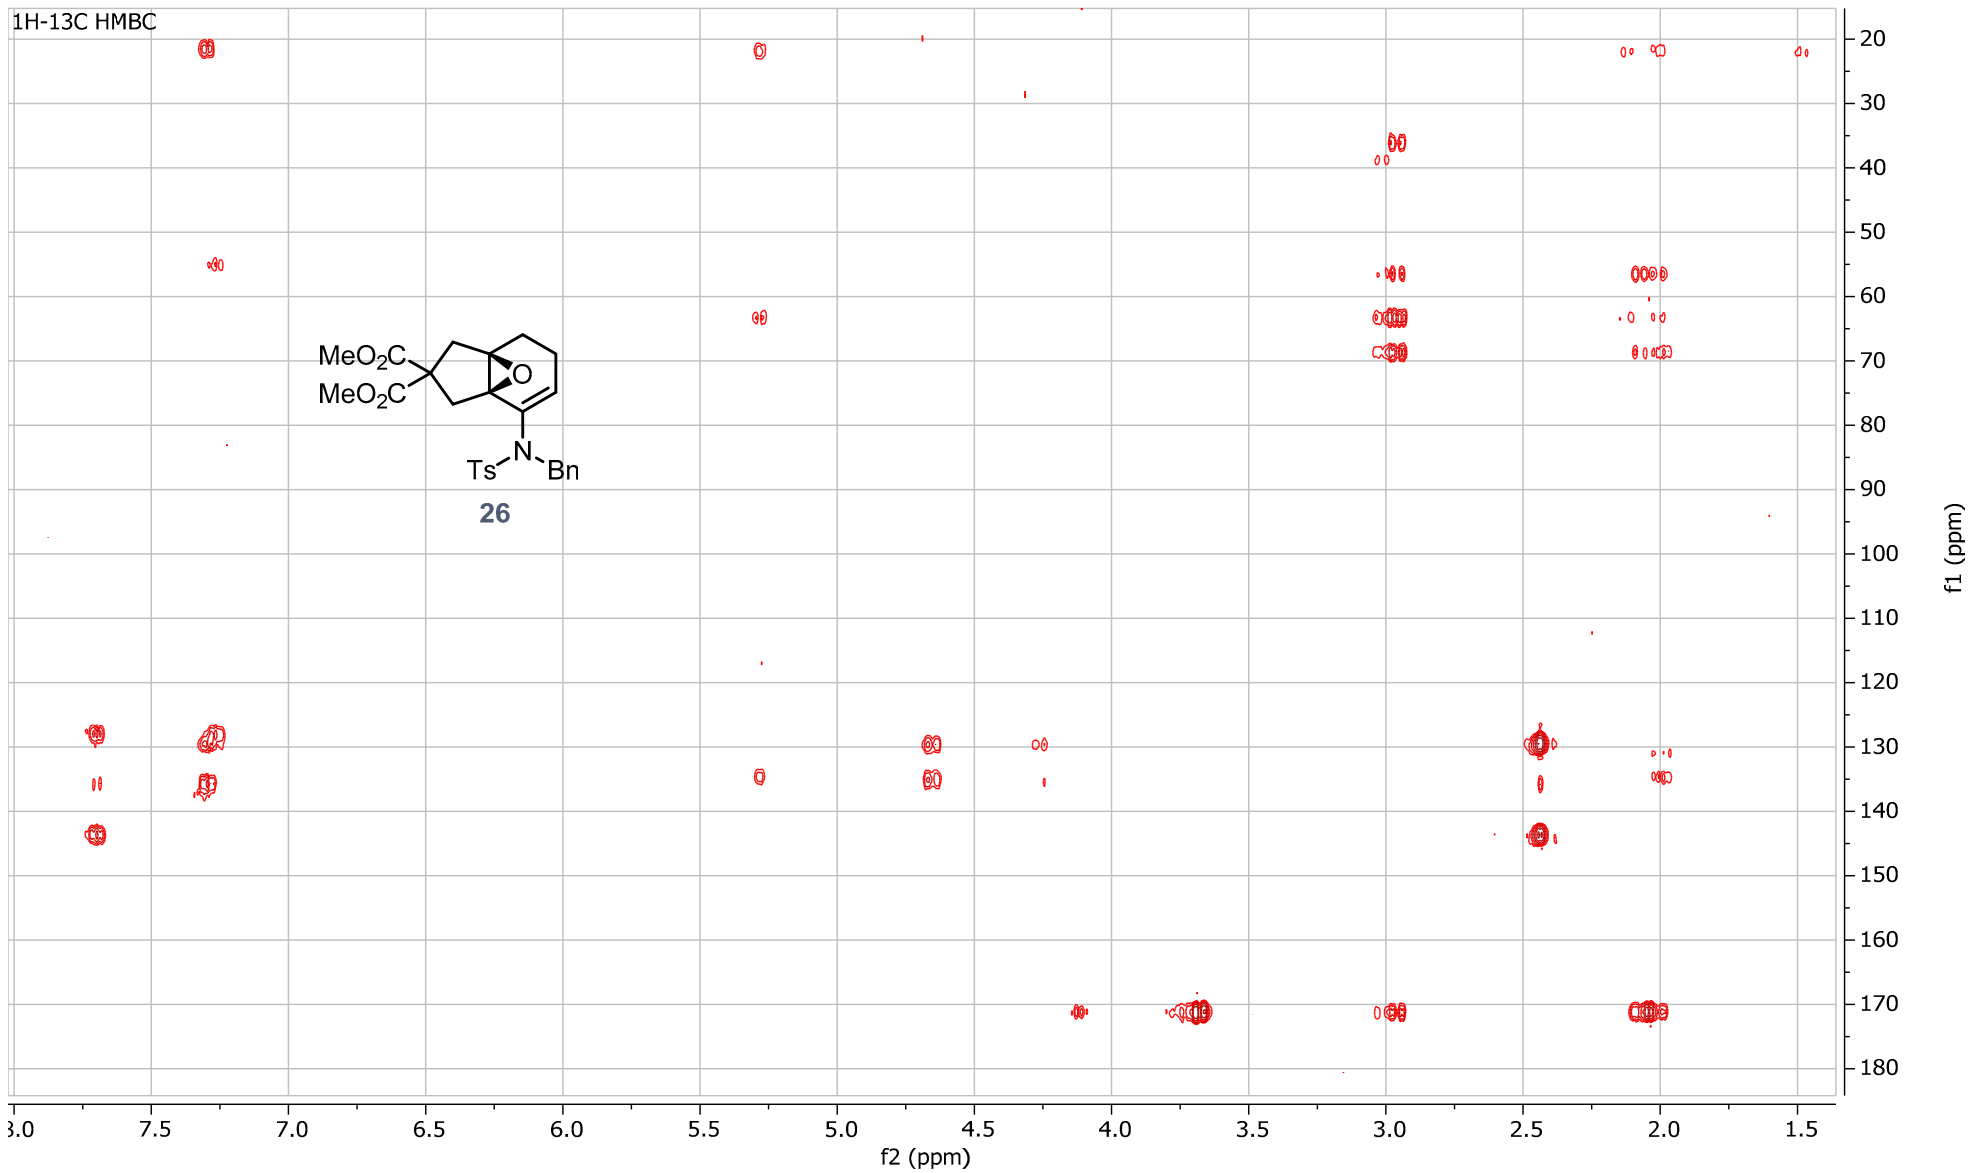



<sup>1</sup>H 400 MHz

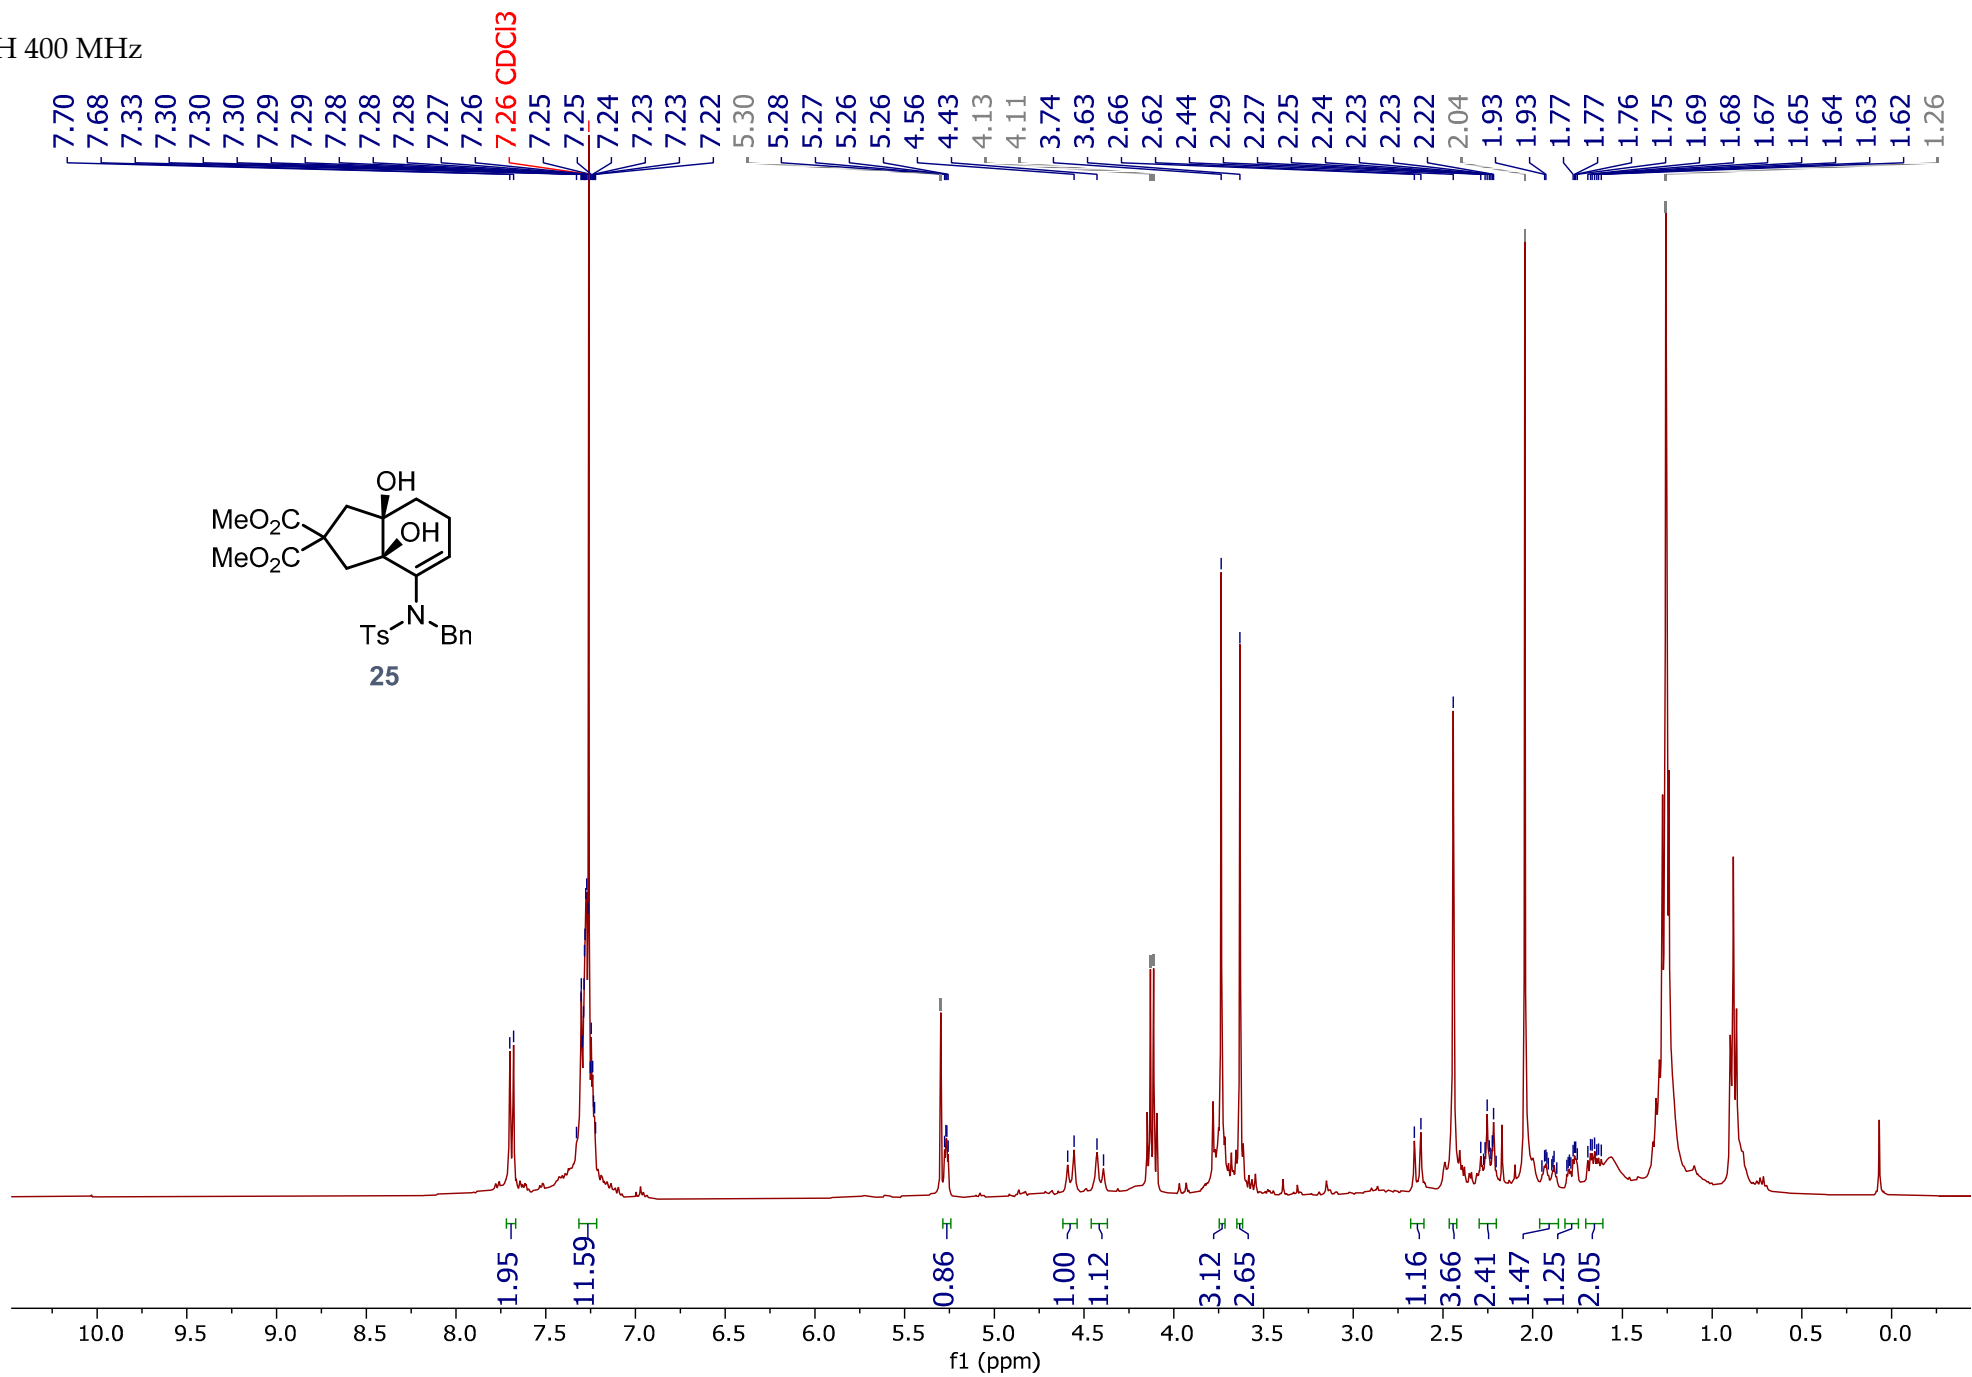

$^{13}\text{C}$  126 MHz

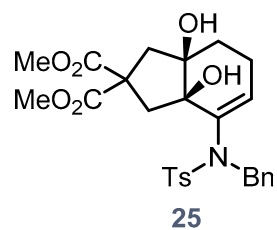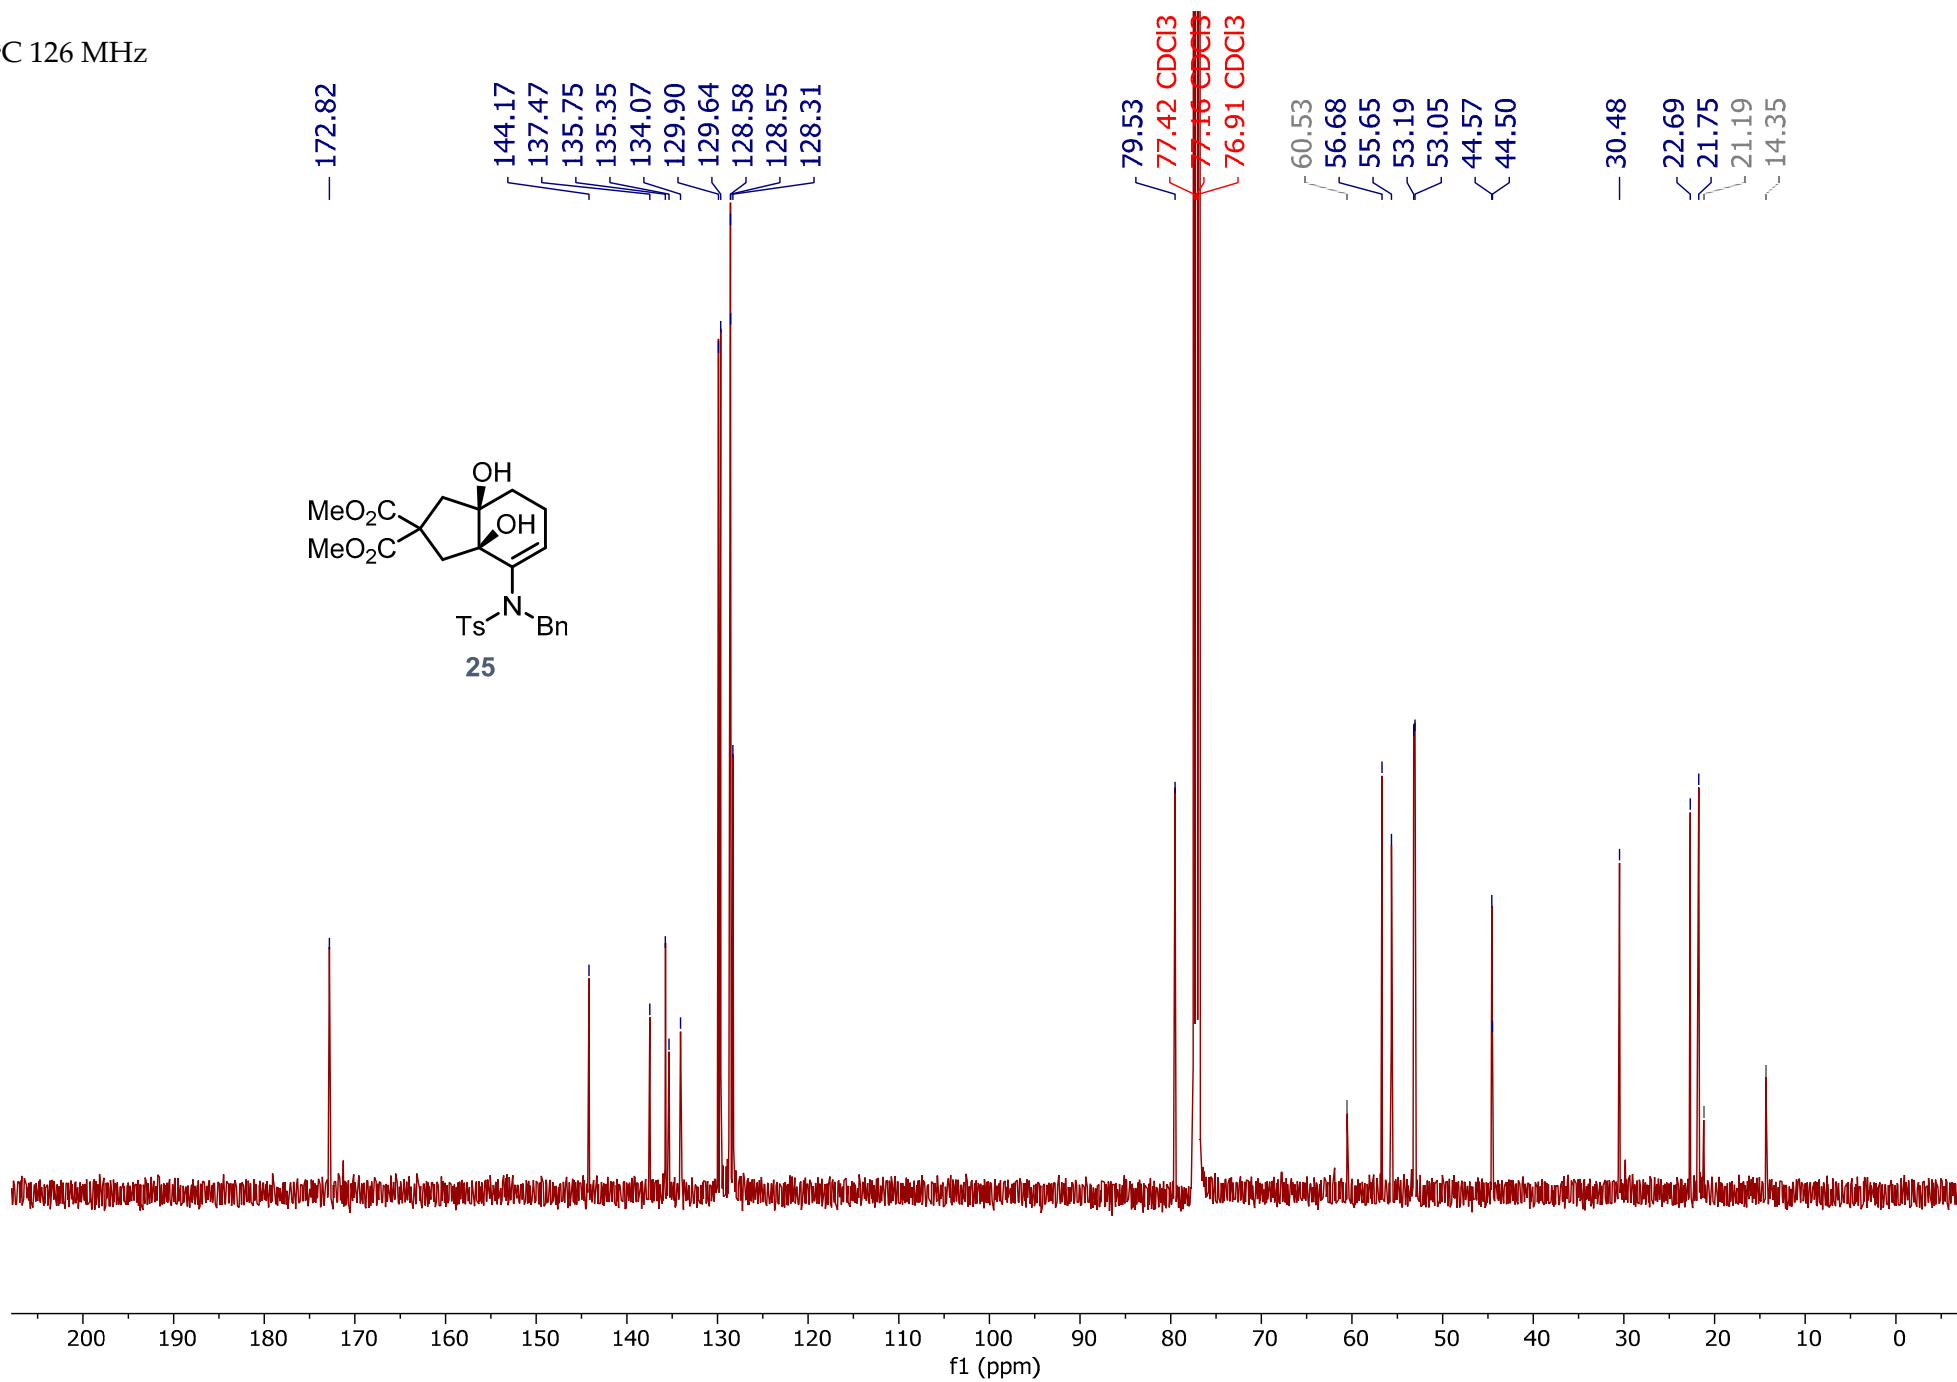

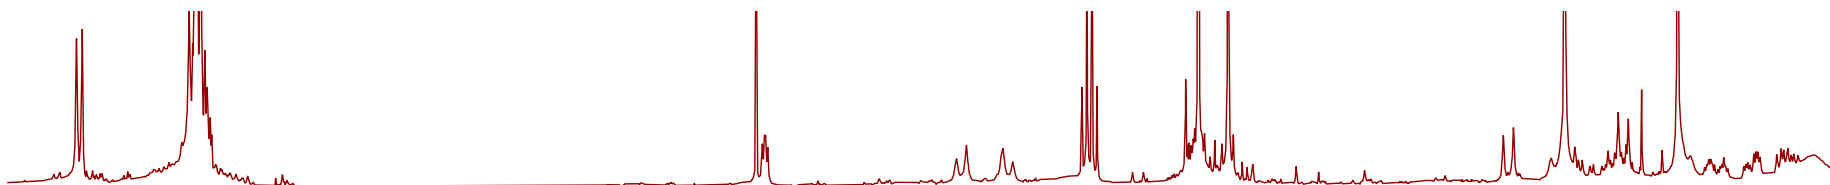

<sup>13</sup>C edited-HSQC

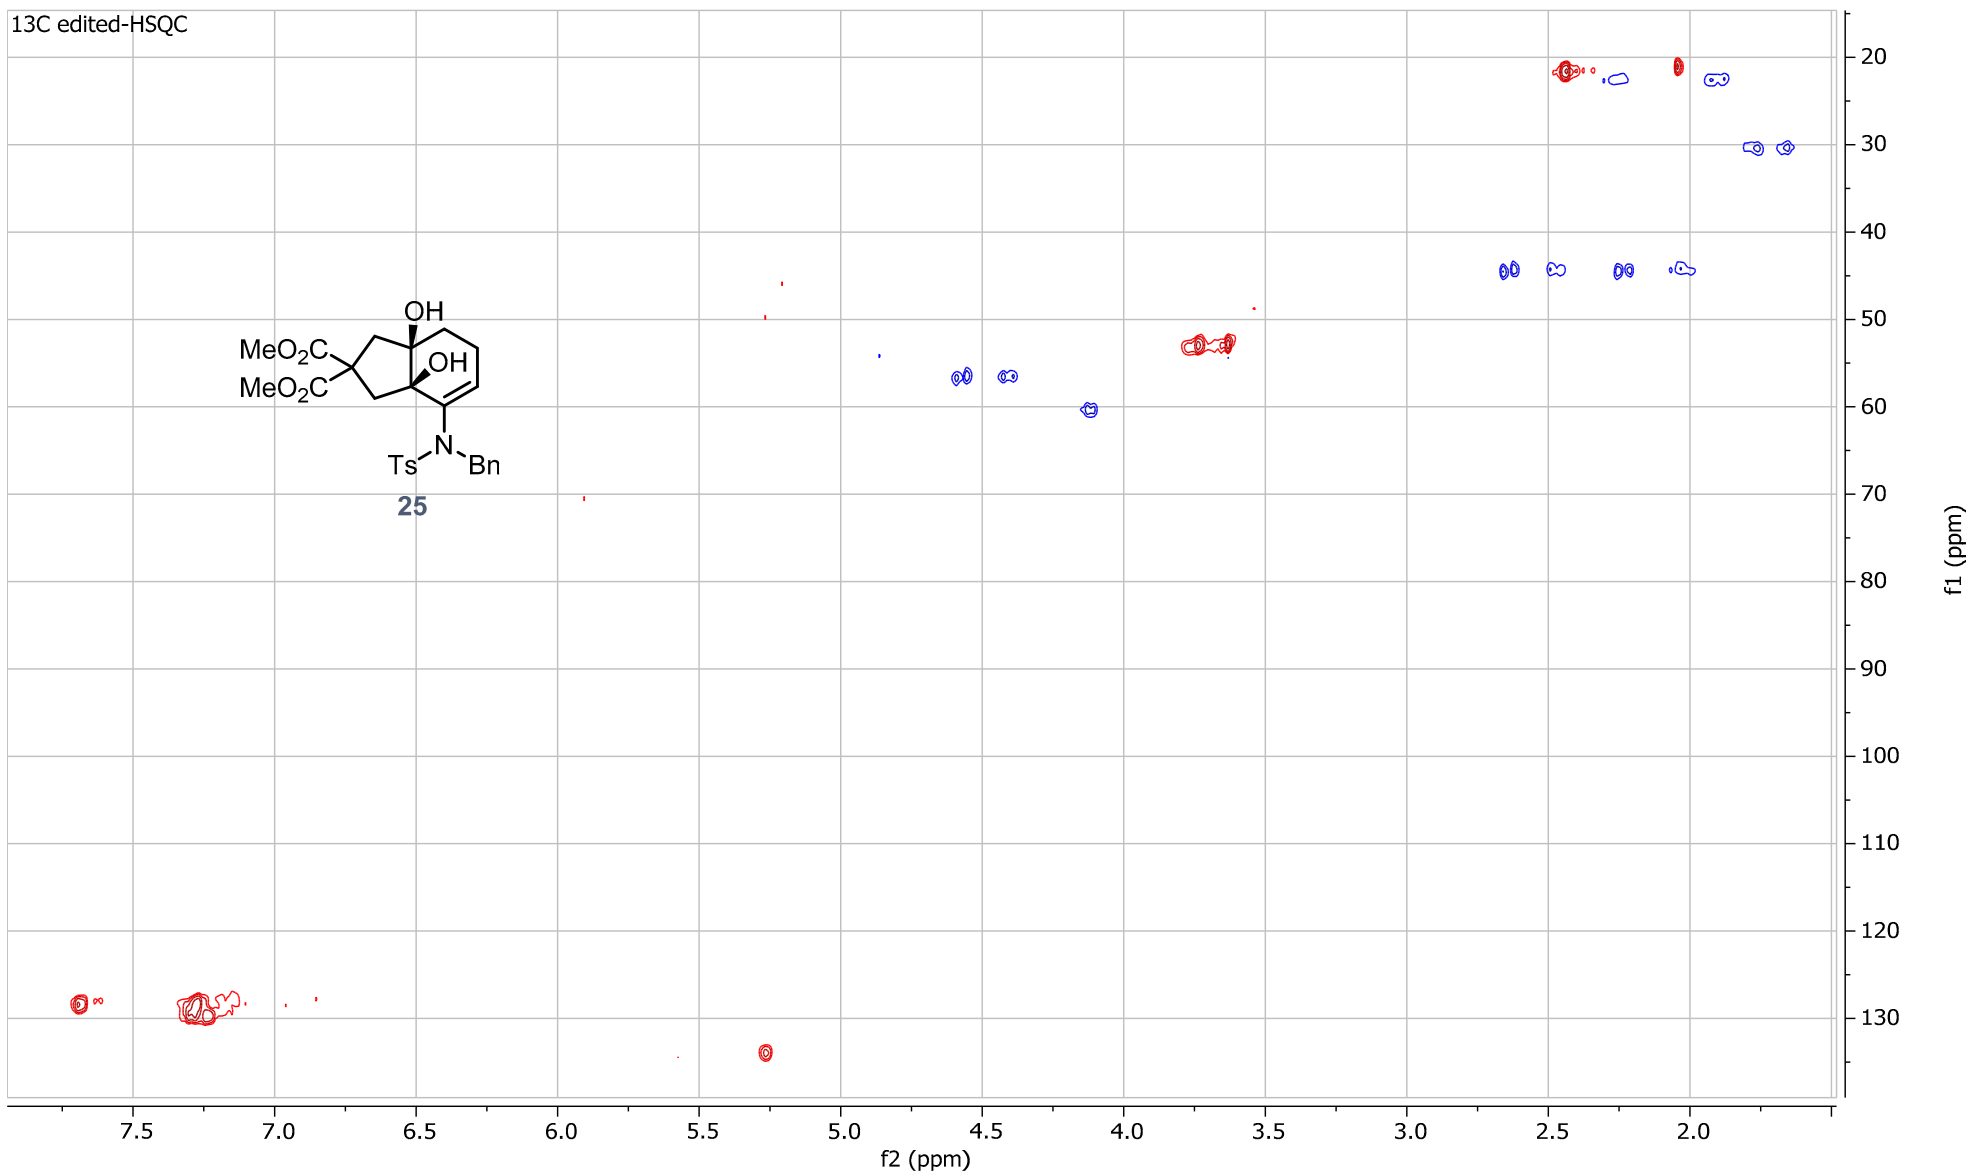

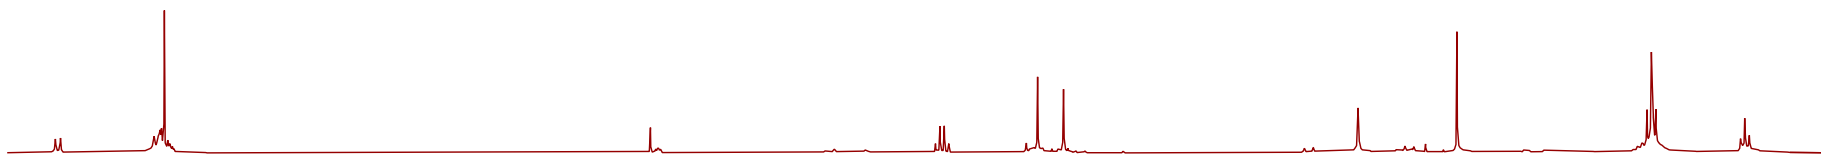

1H-13C HMBC

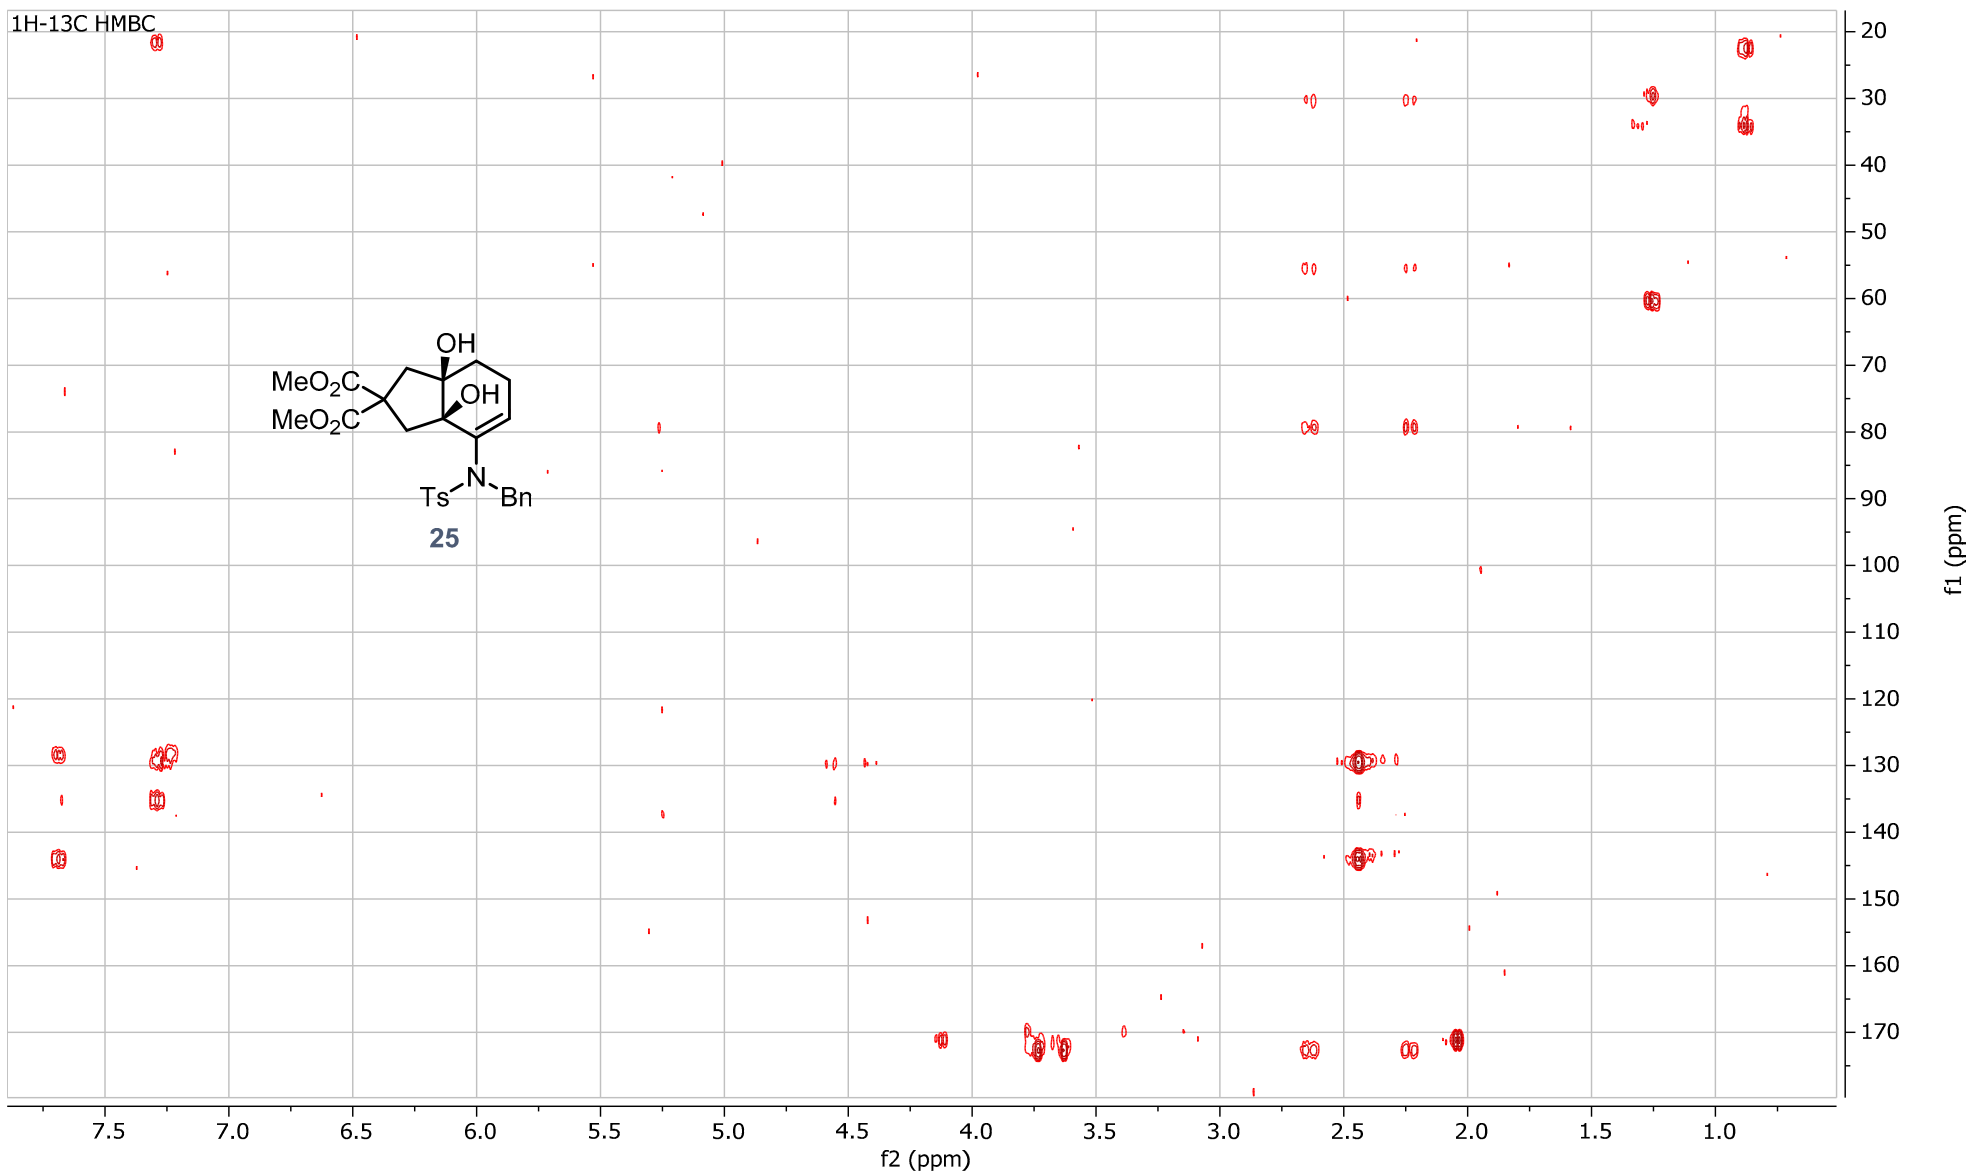

<sup>1</sup>H 400 MHz

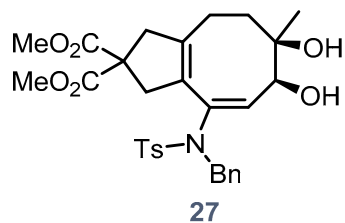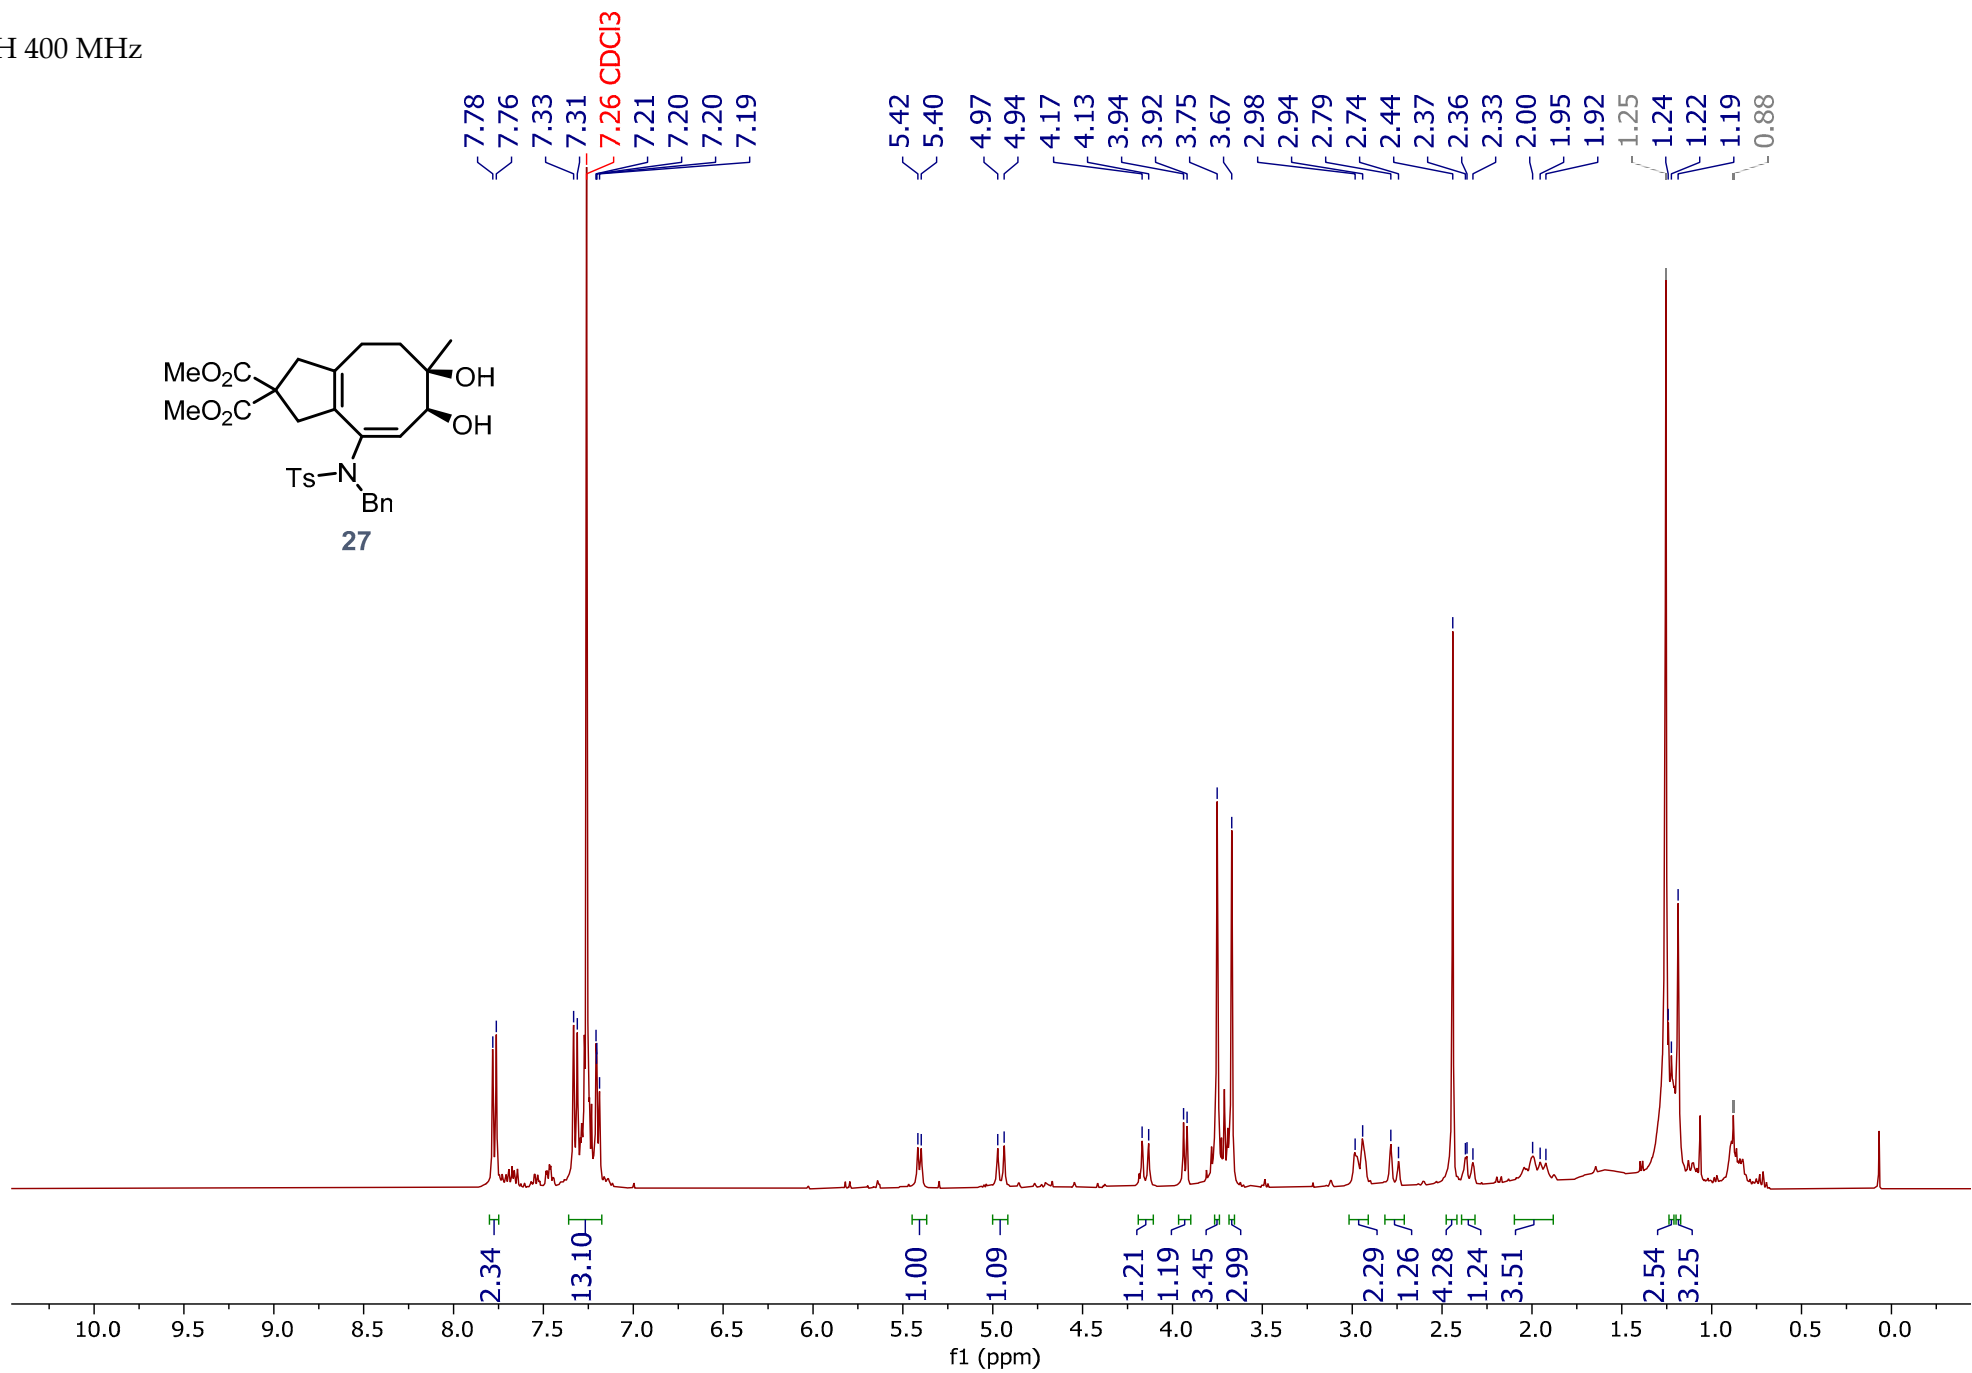

<sup>13</sup>C 126 MHz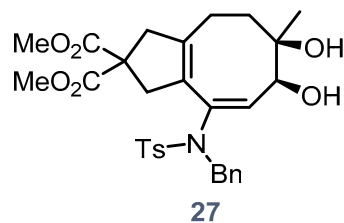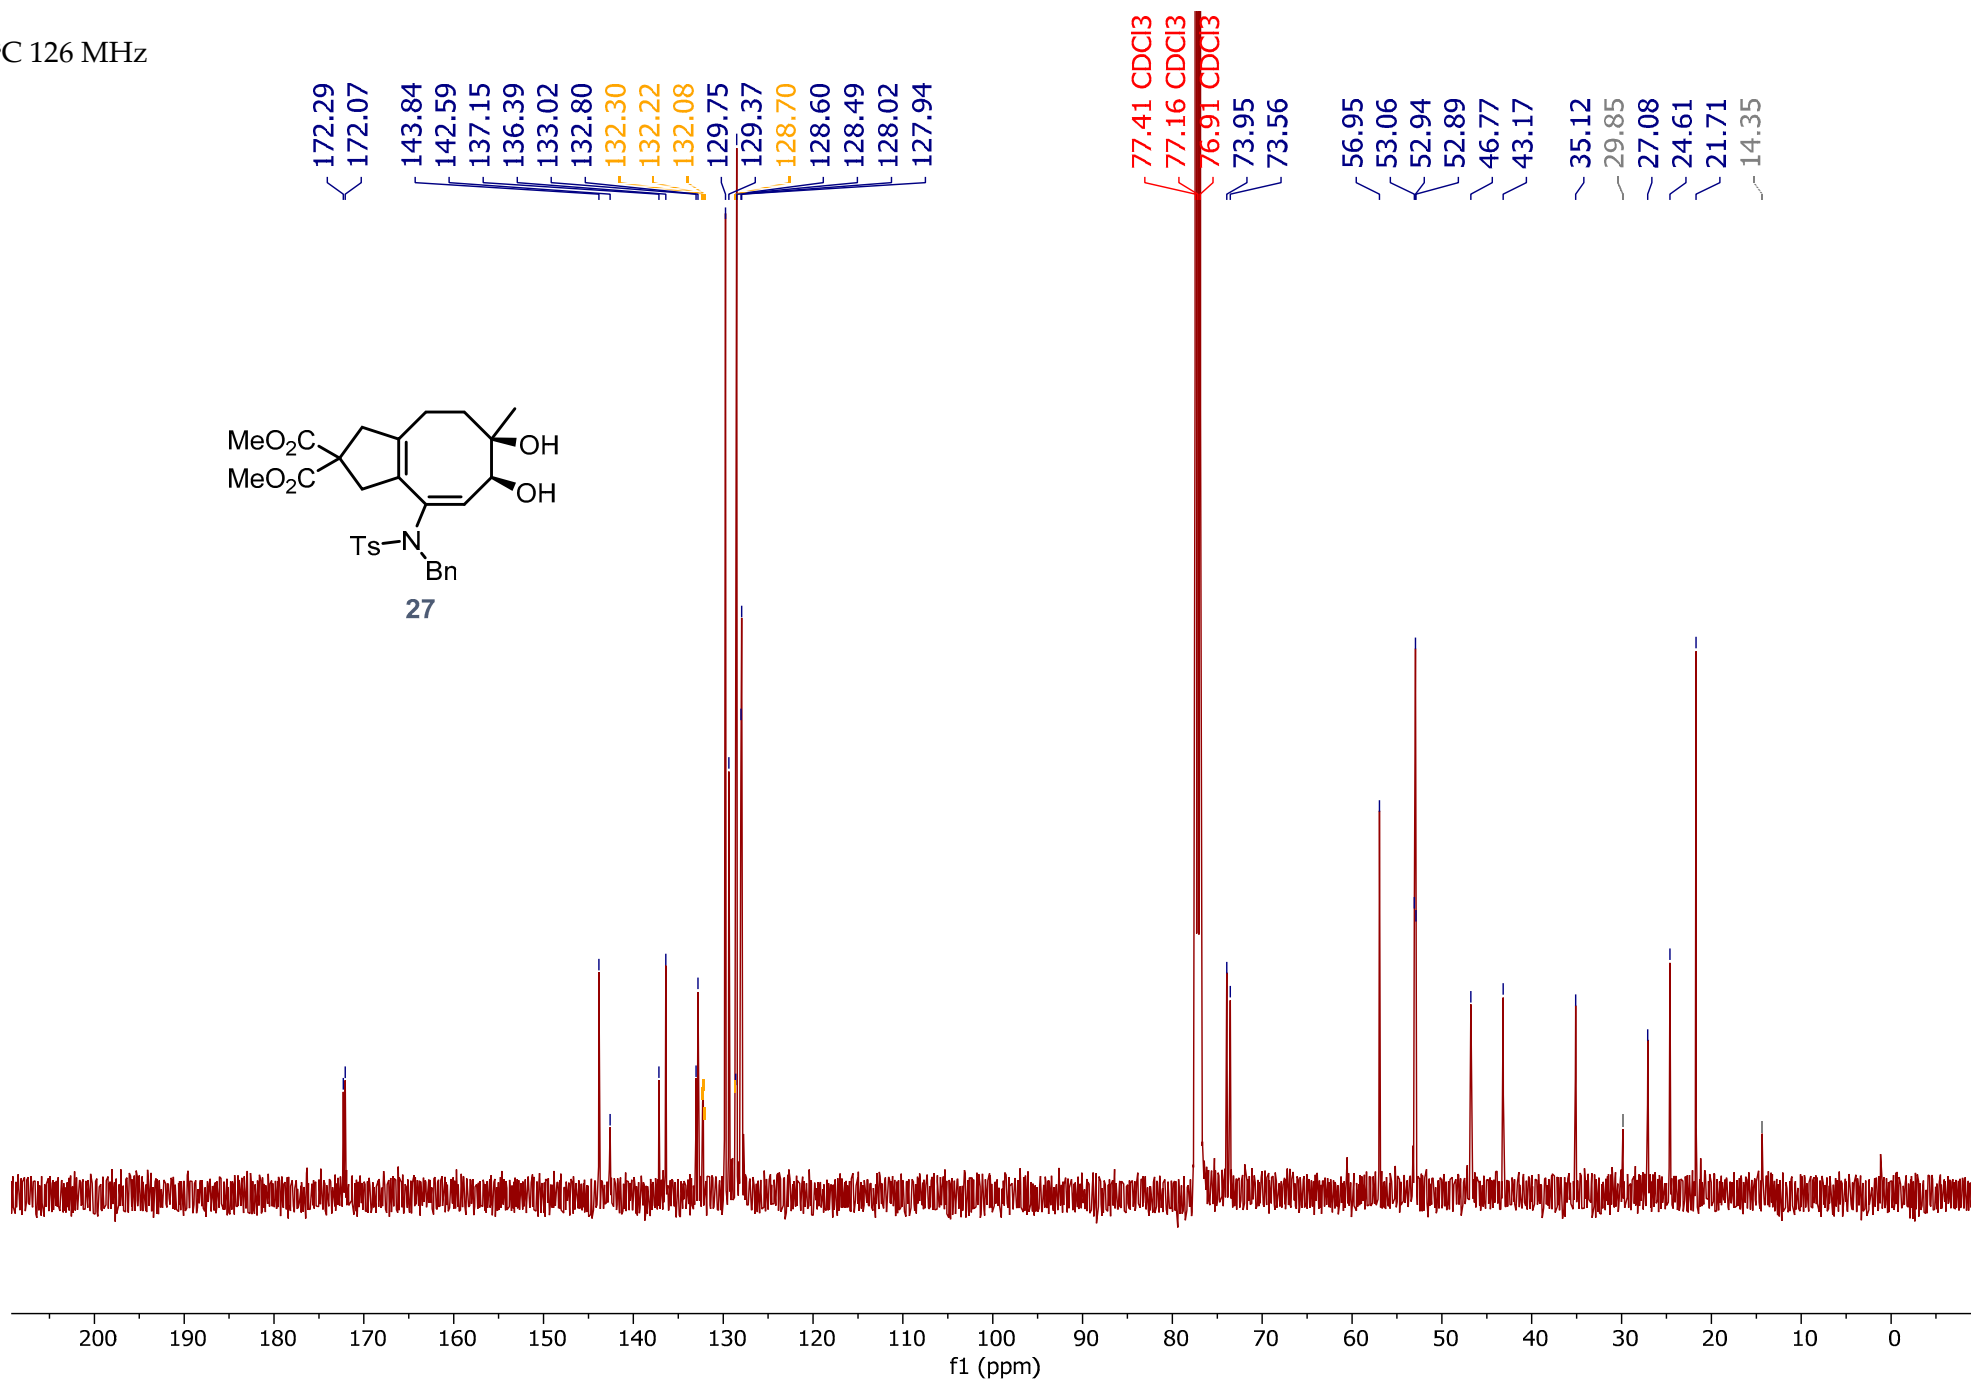

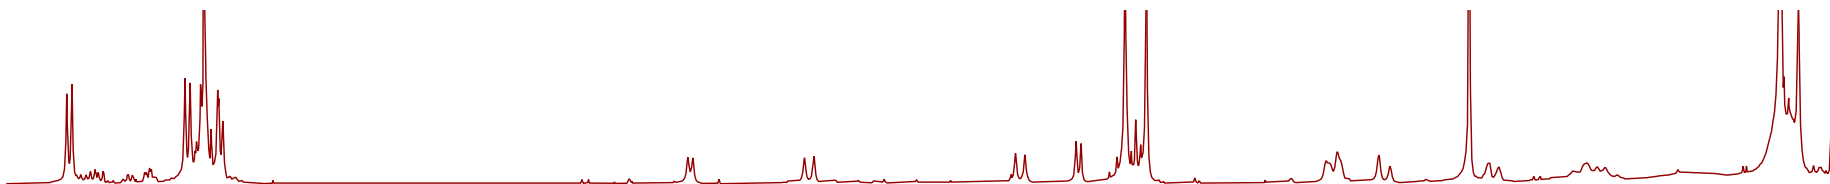

<sup>13</sup>C edited-HSQC

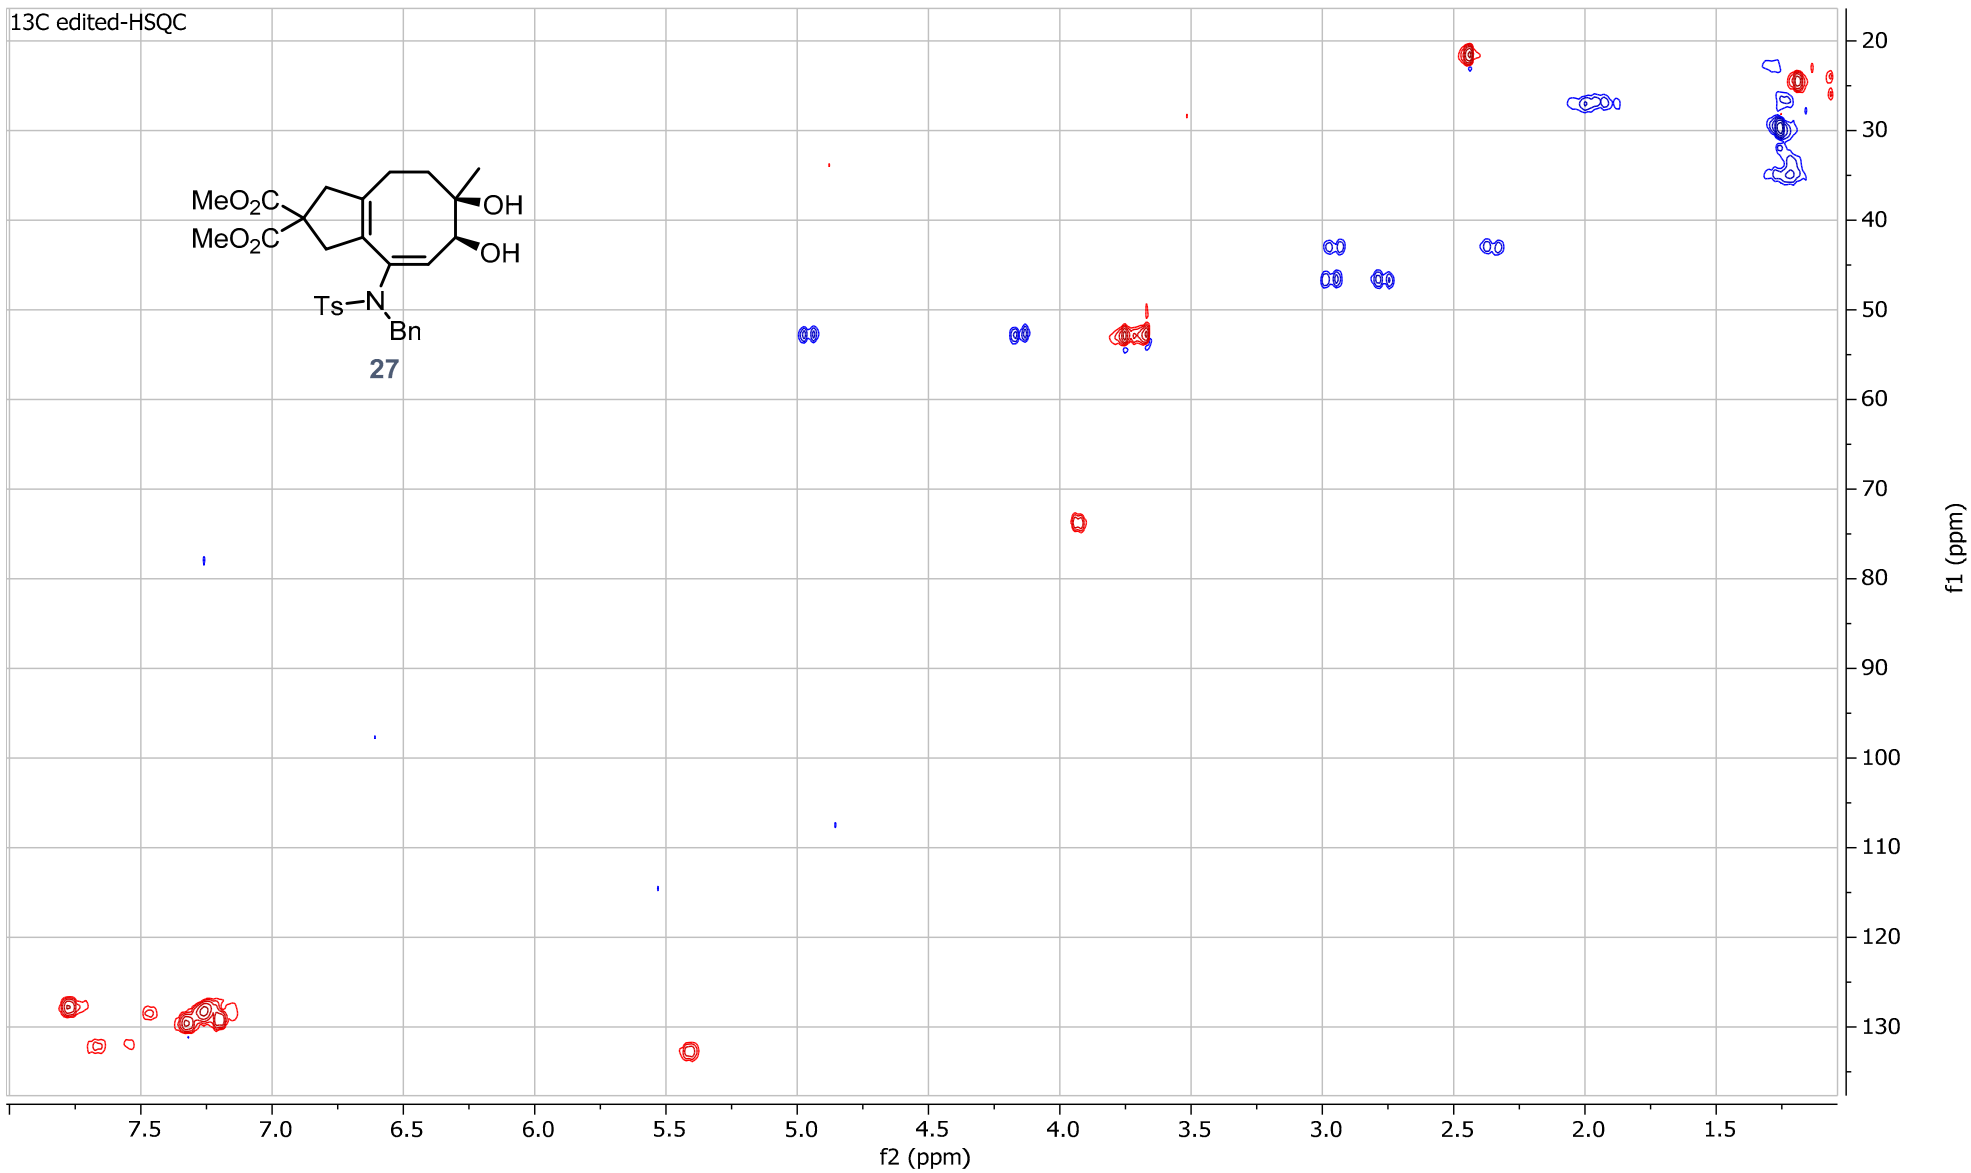

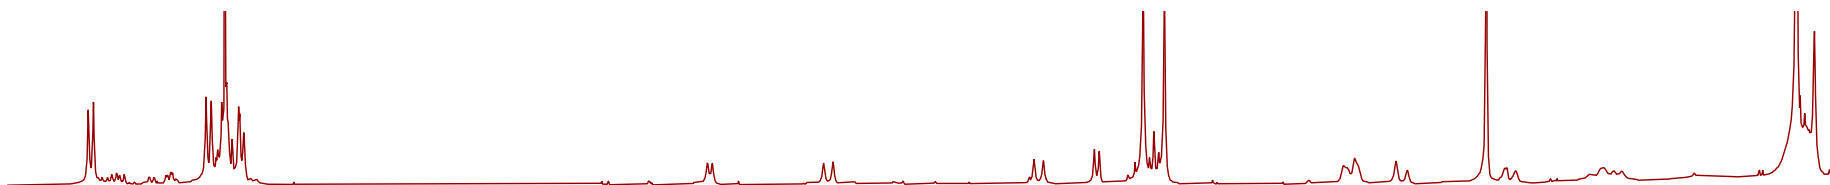

1H-13C HMBC

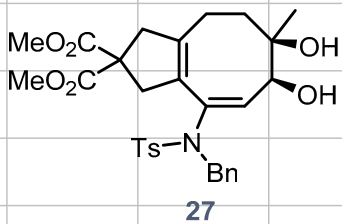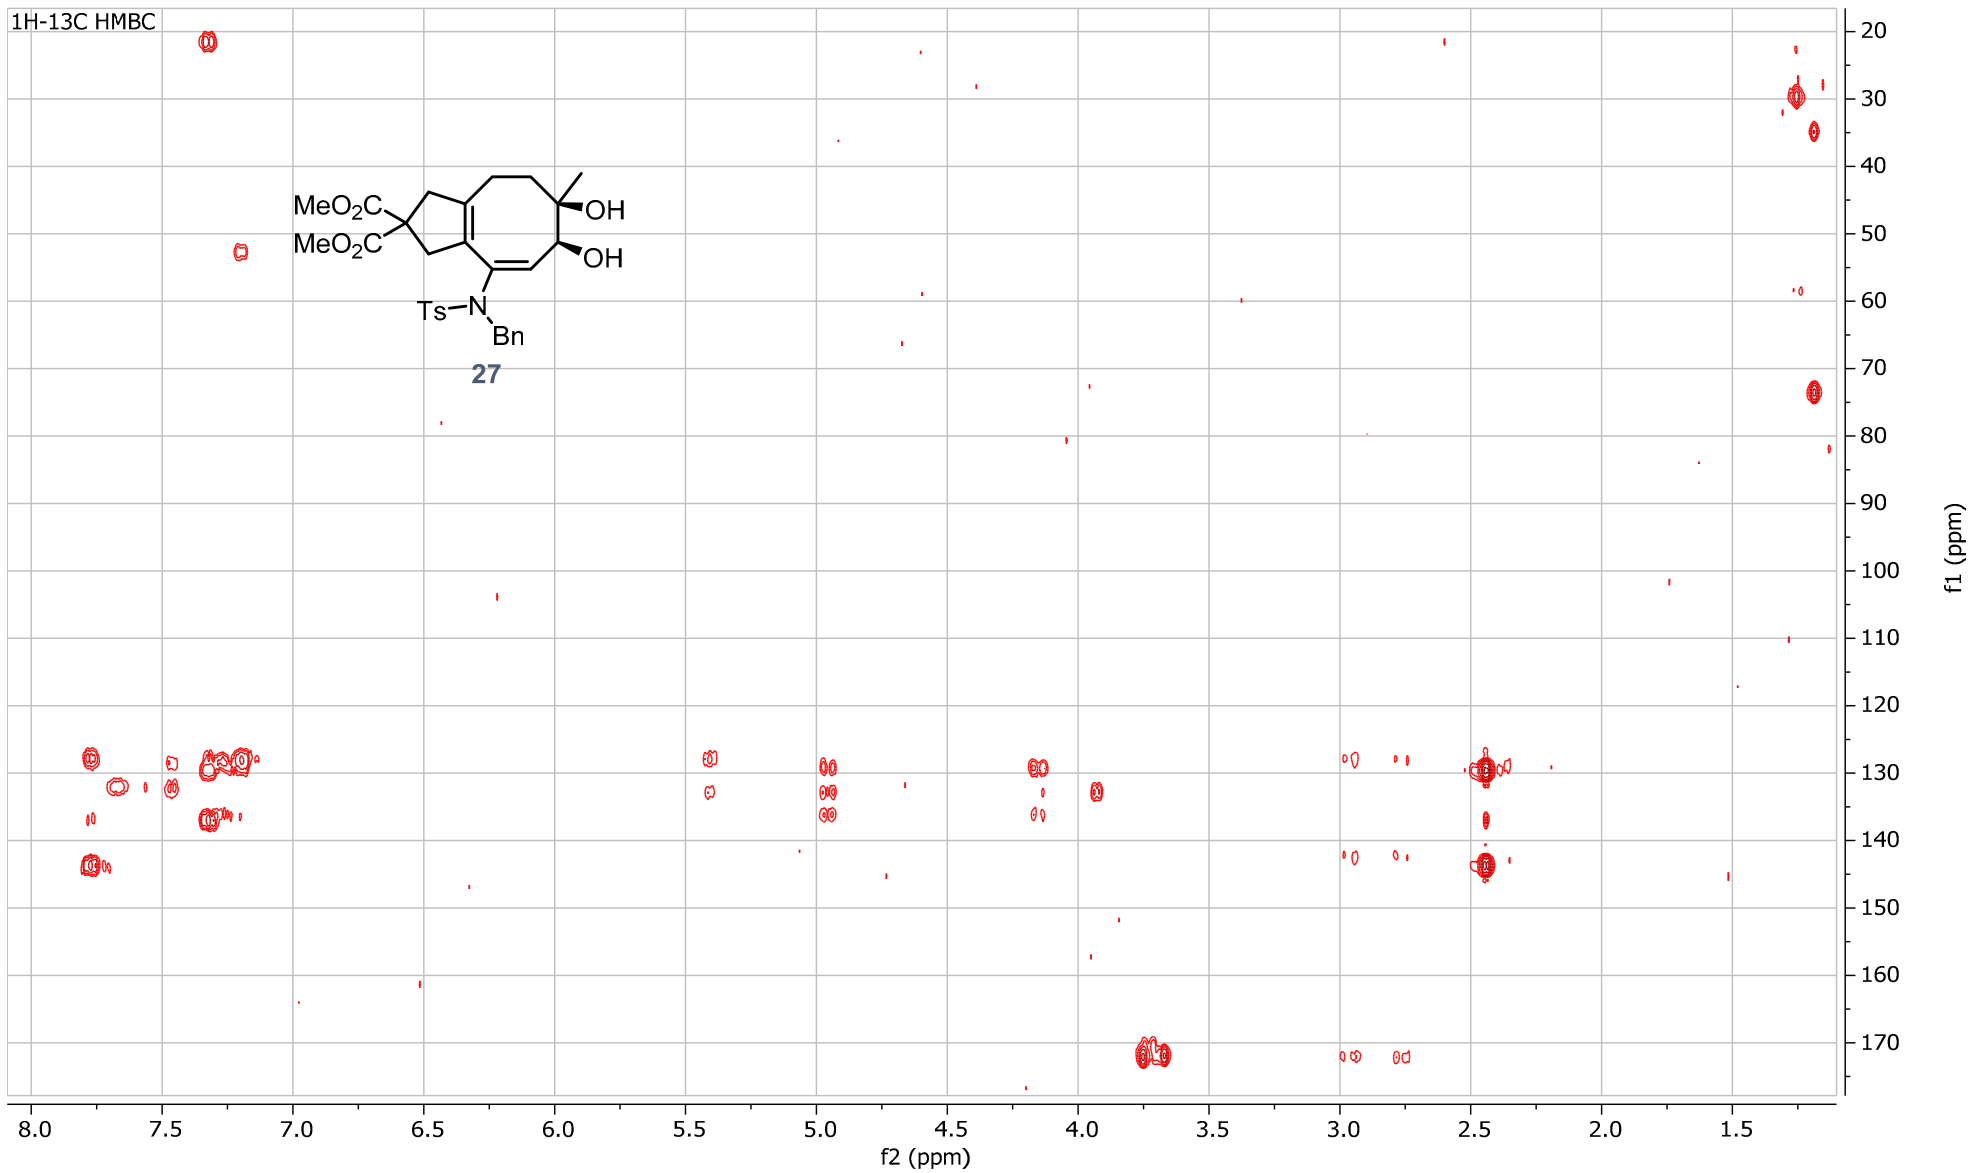



<sup>1</sup>H 400 MHz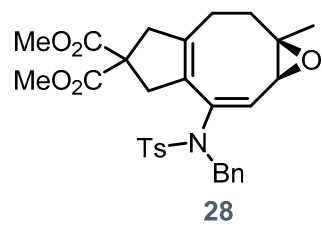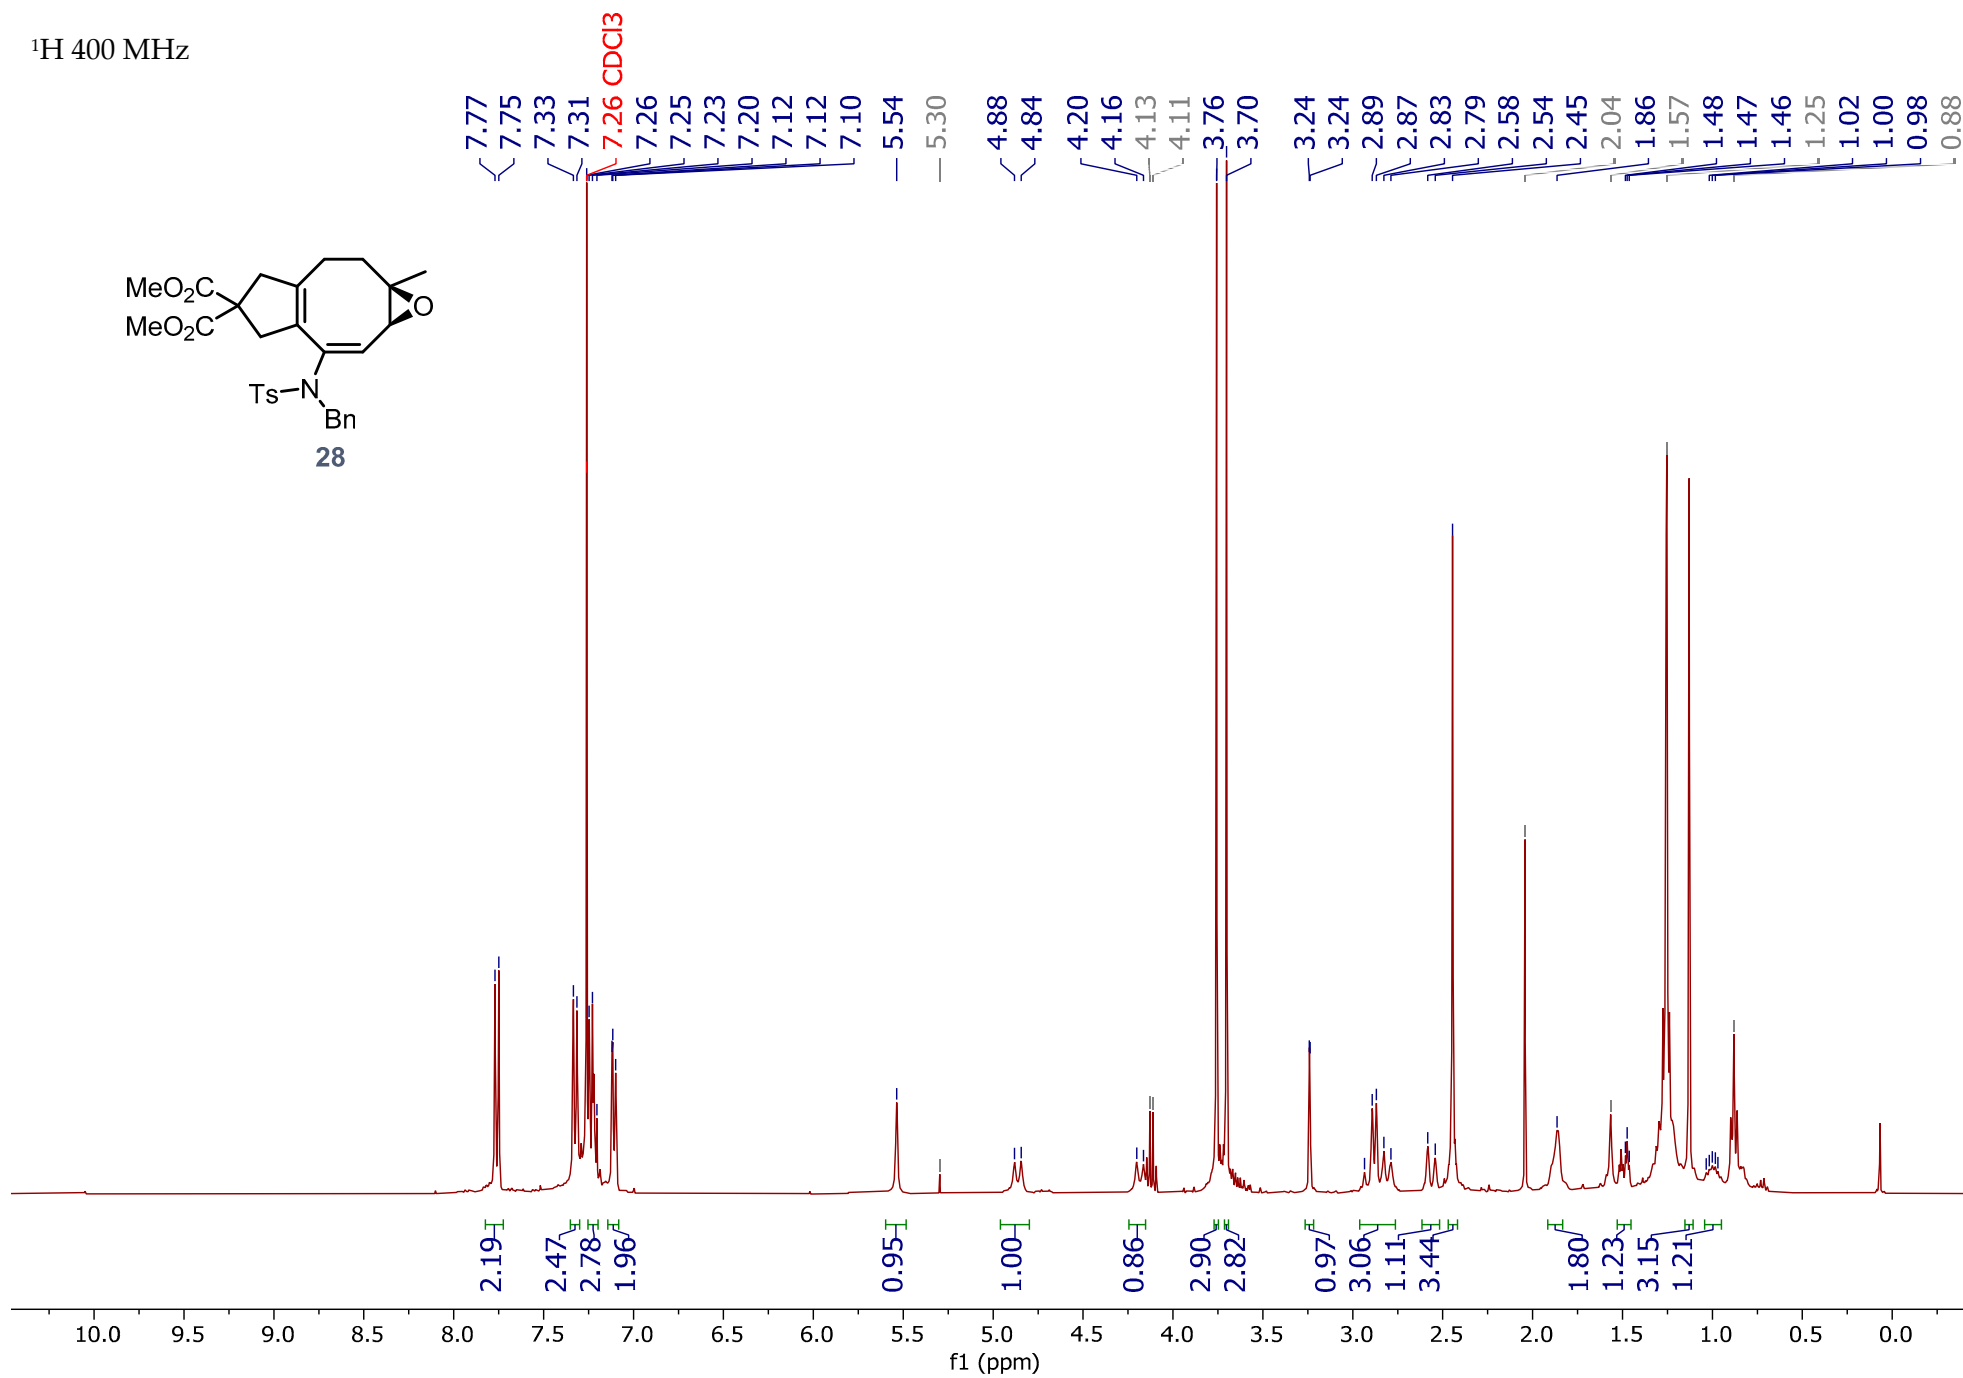

$^{13}\text{C}$  101 MHz

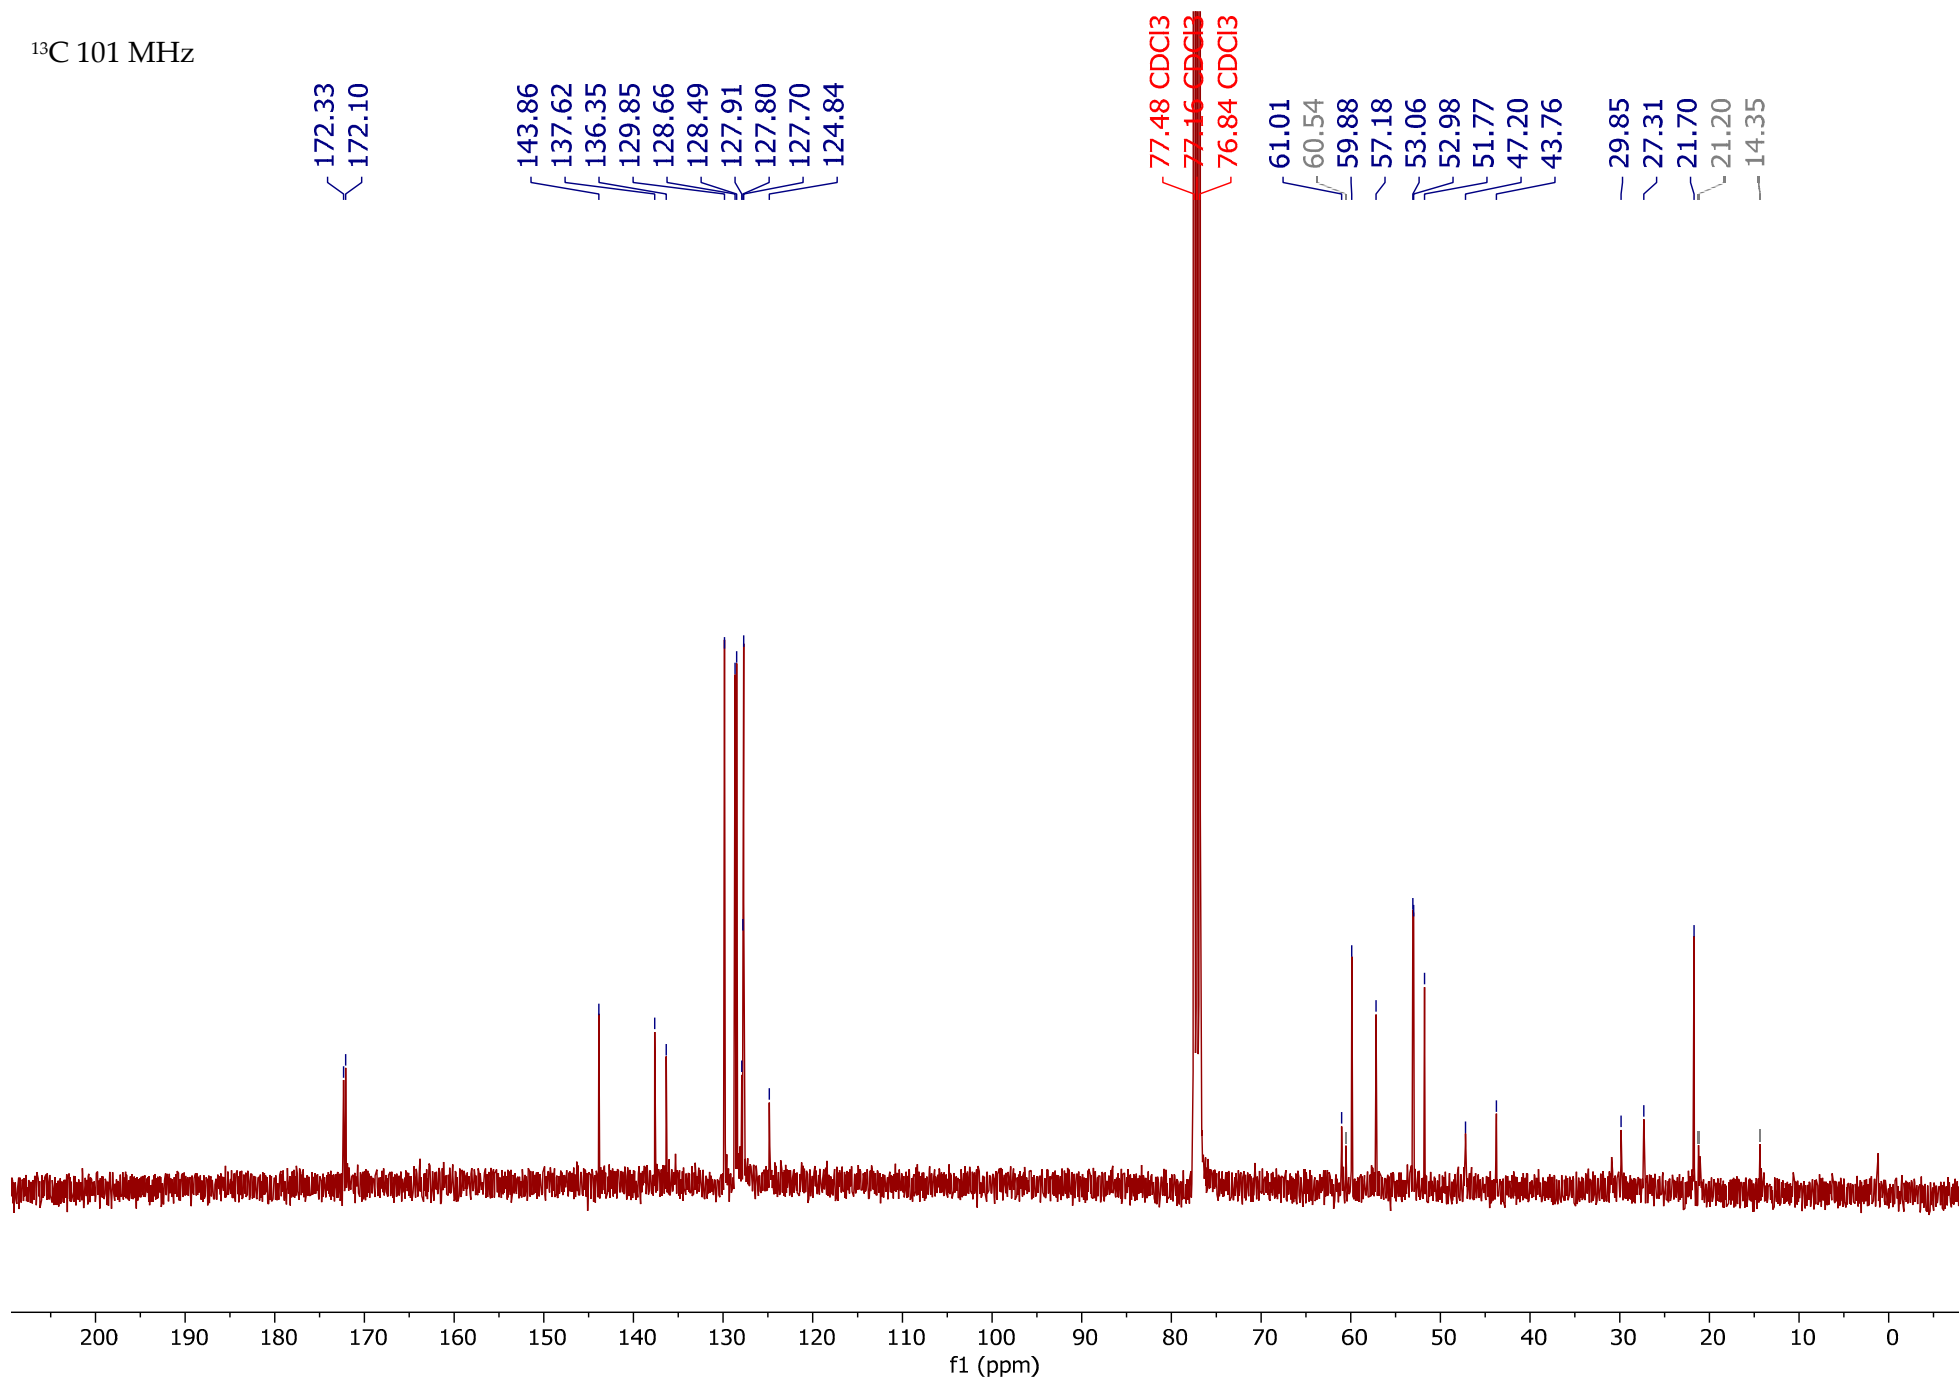

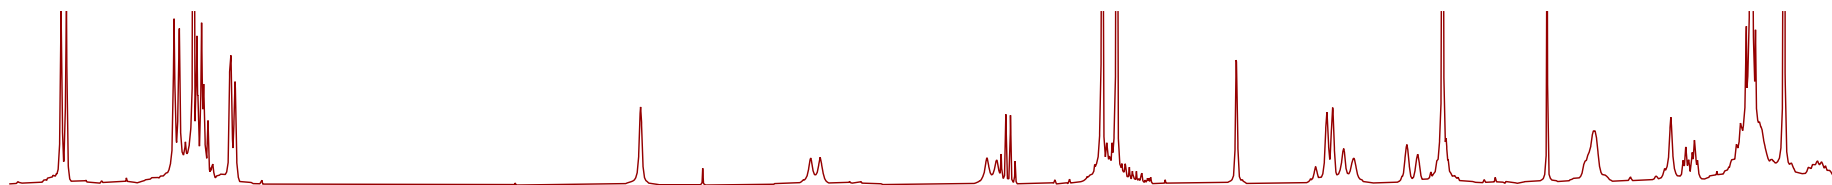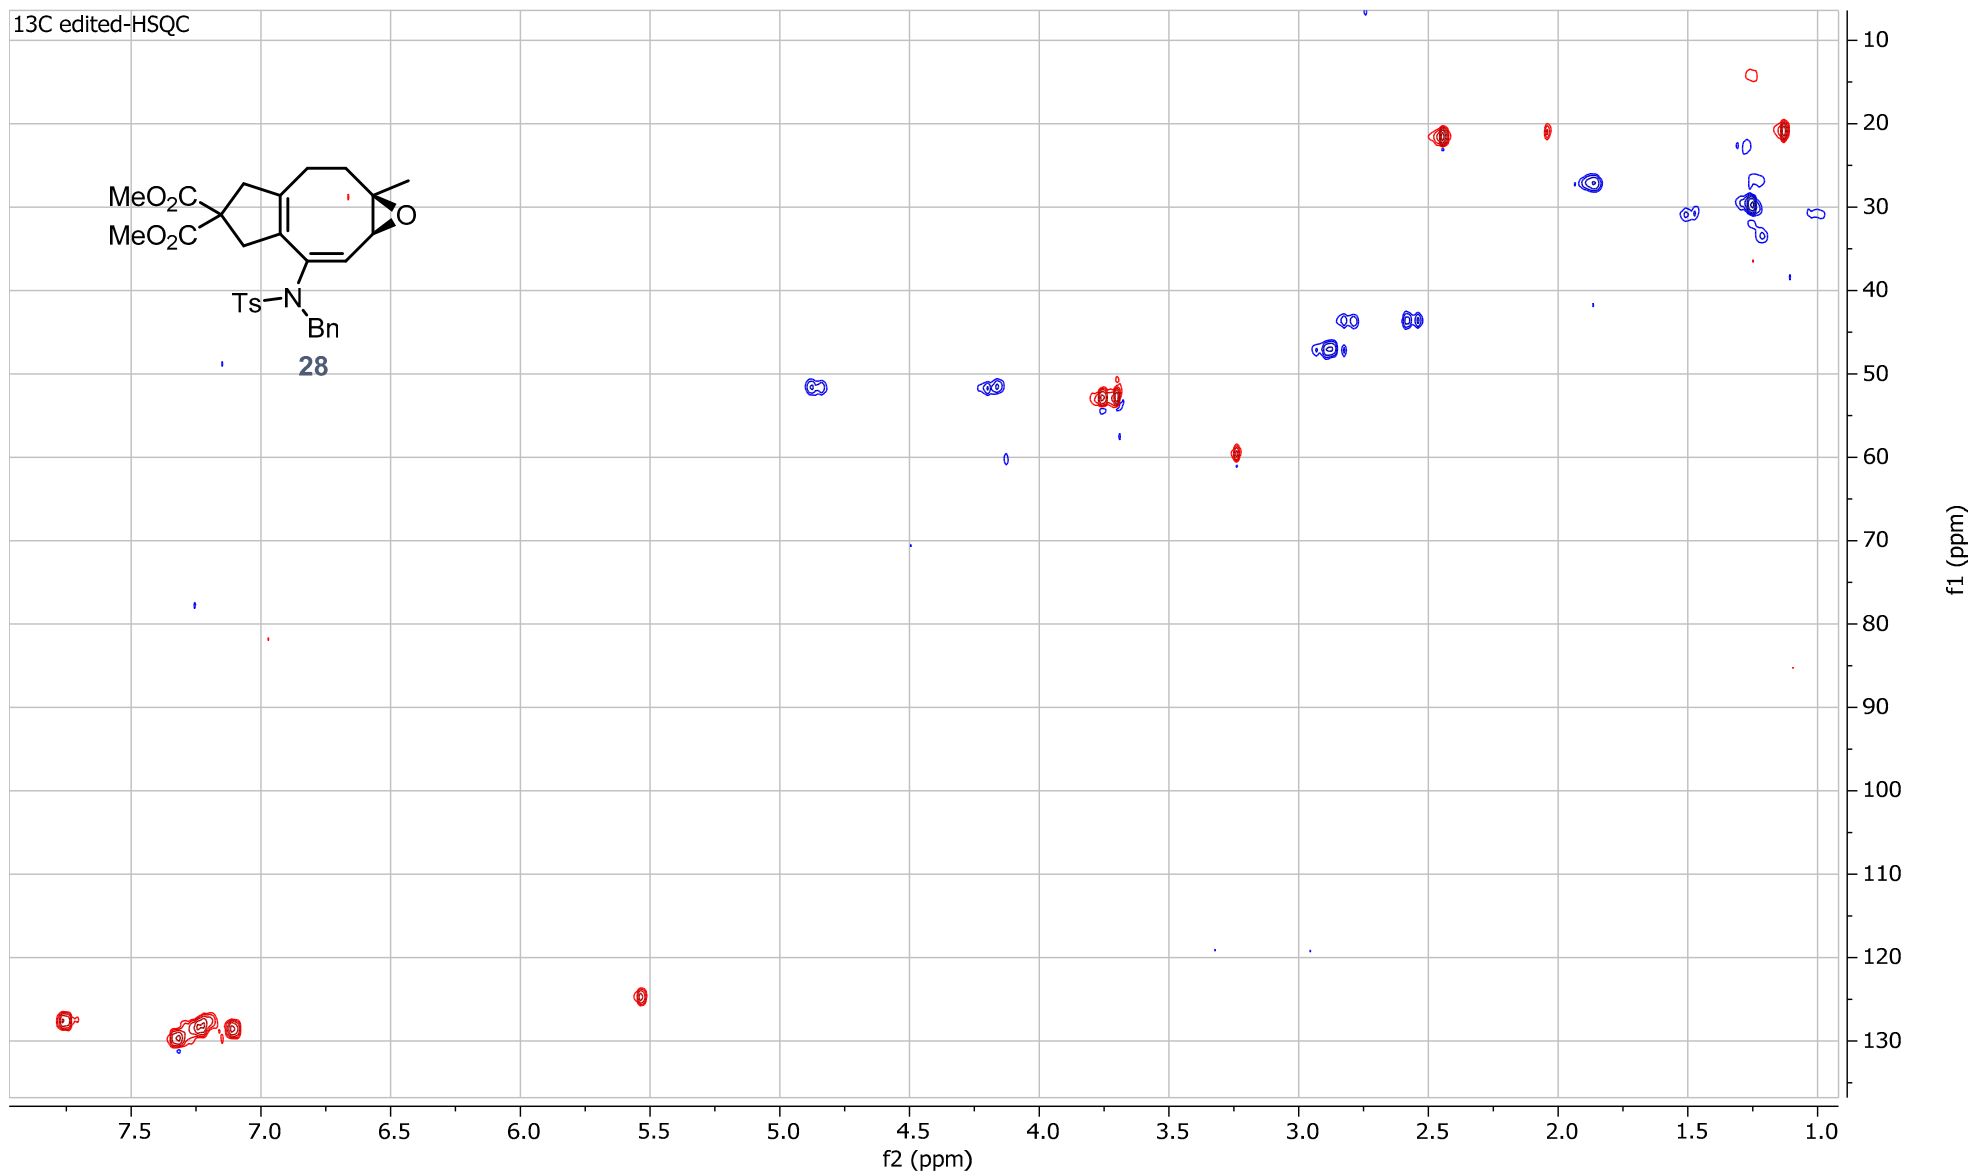

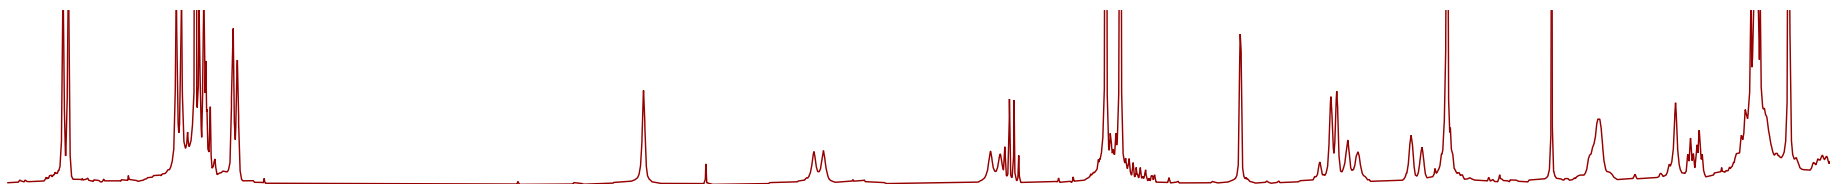

1H-13C HMBC

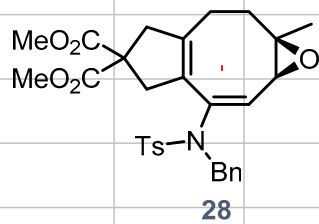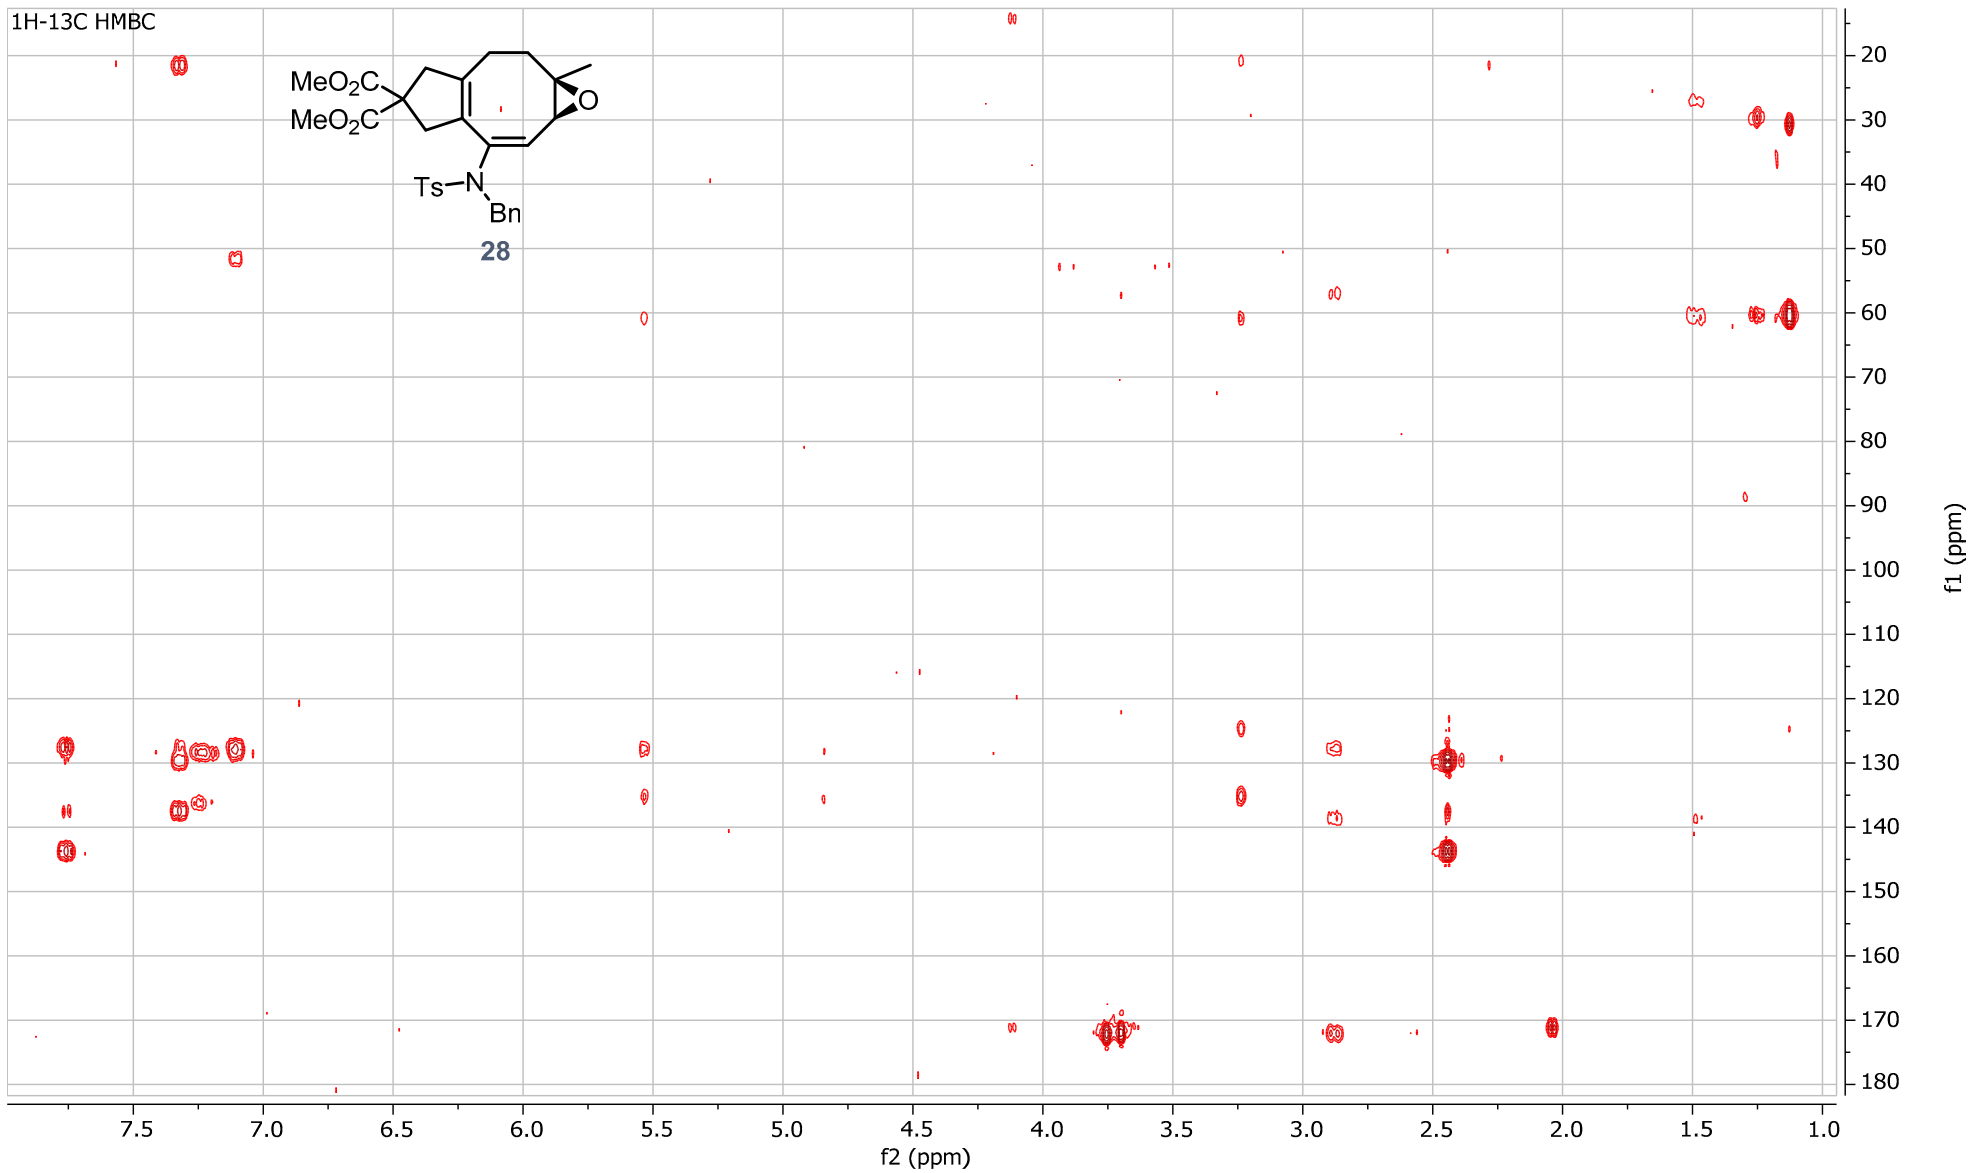

<sup>1</sup>H 400 MHz

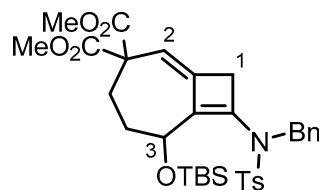

37

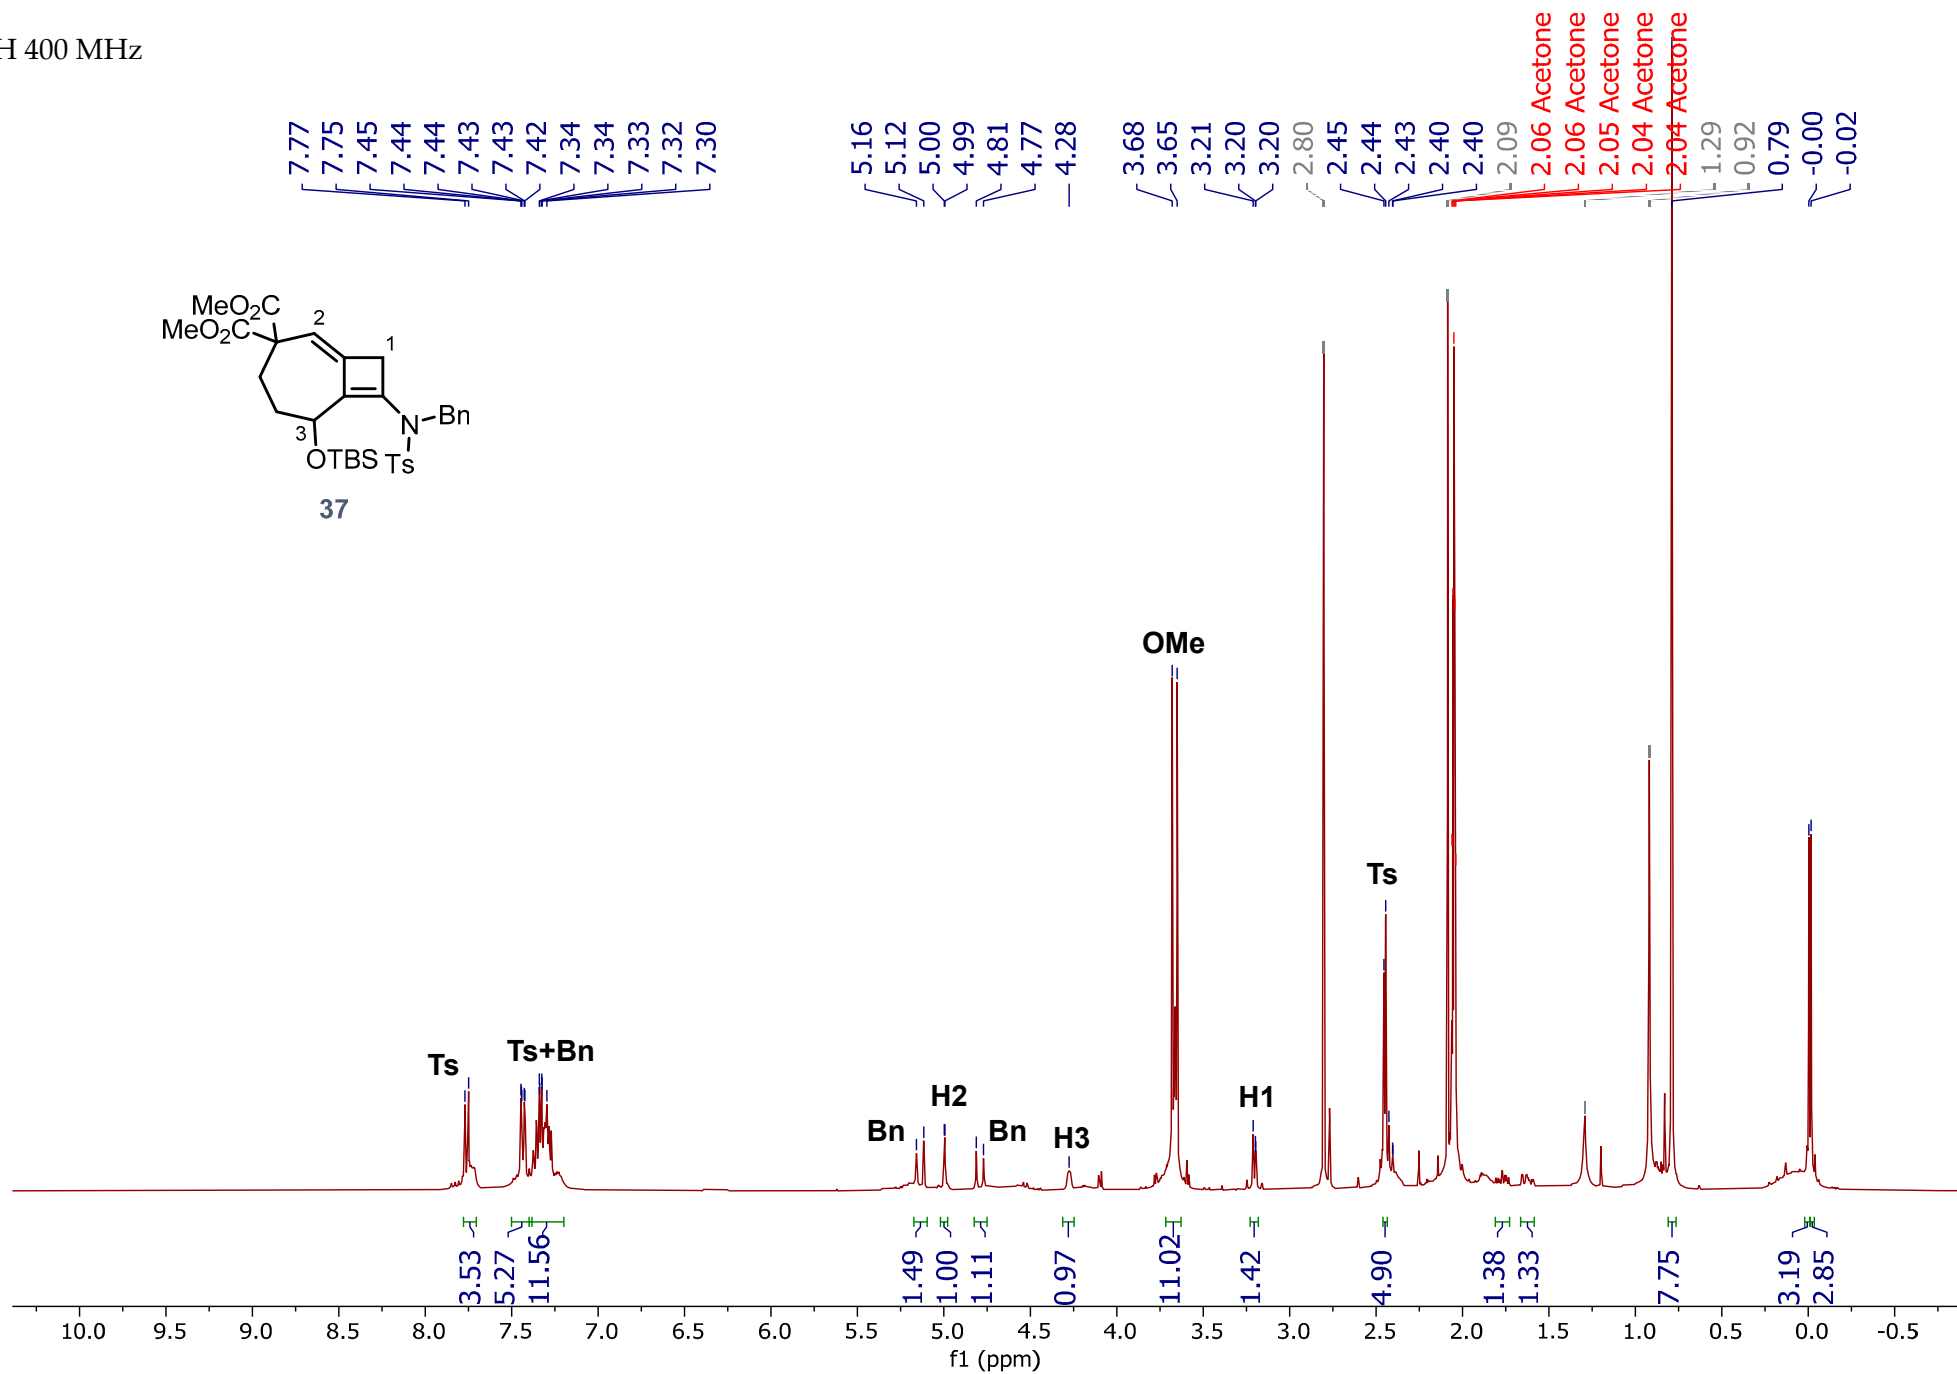

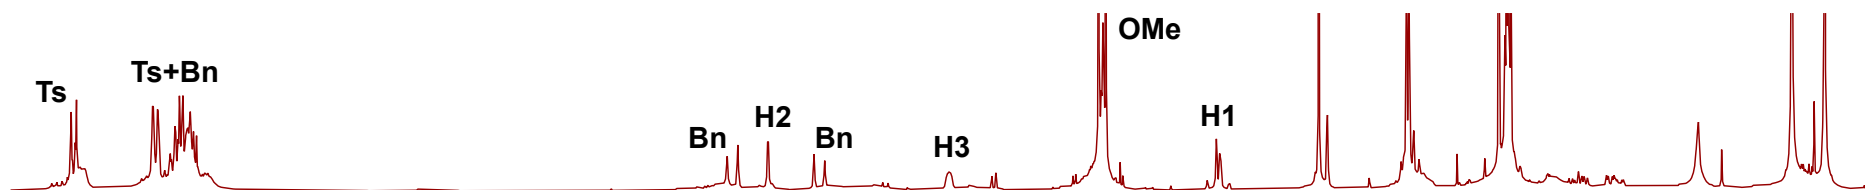

13C edited-HSQC

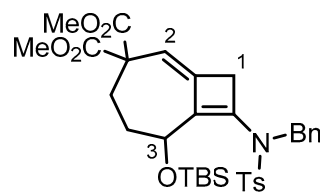

**37**

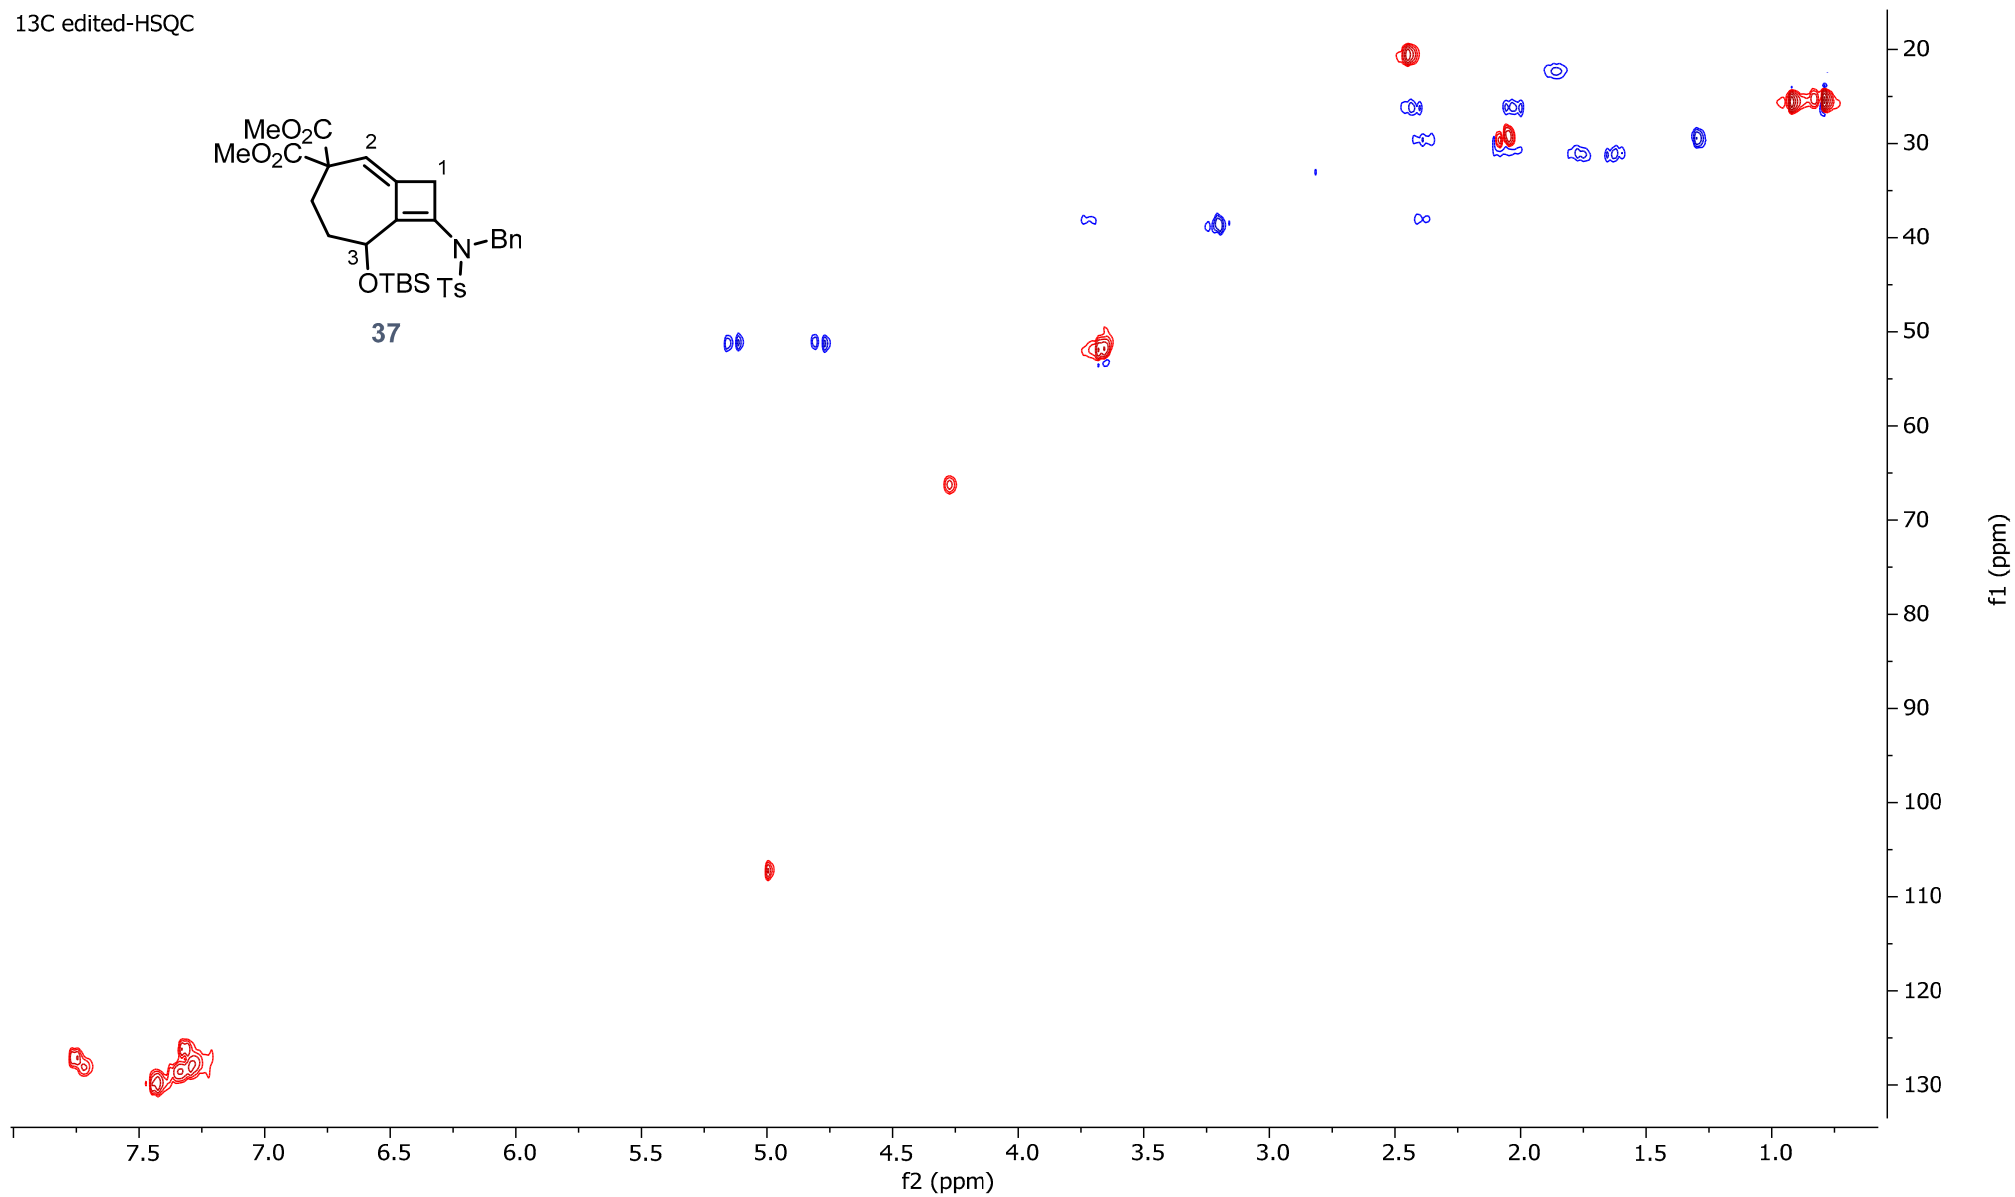

<sup>1</sup>H 400 MHz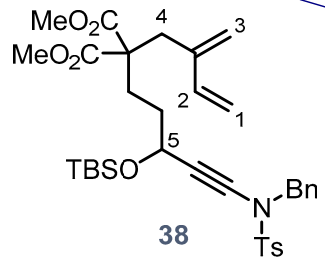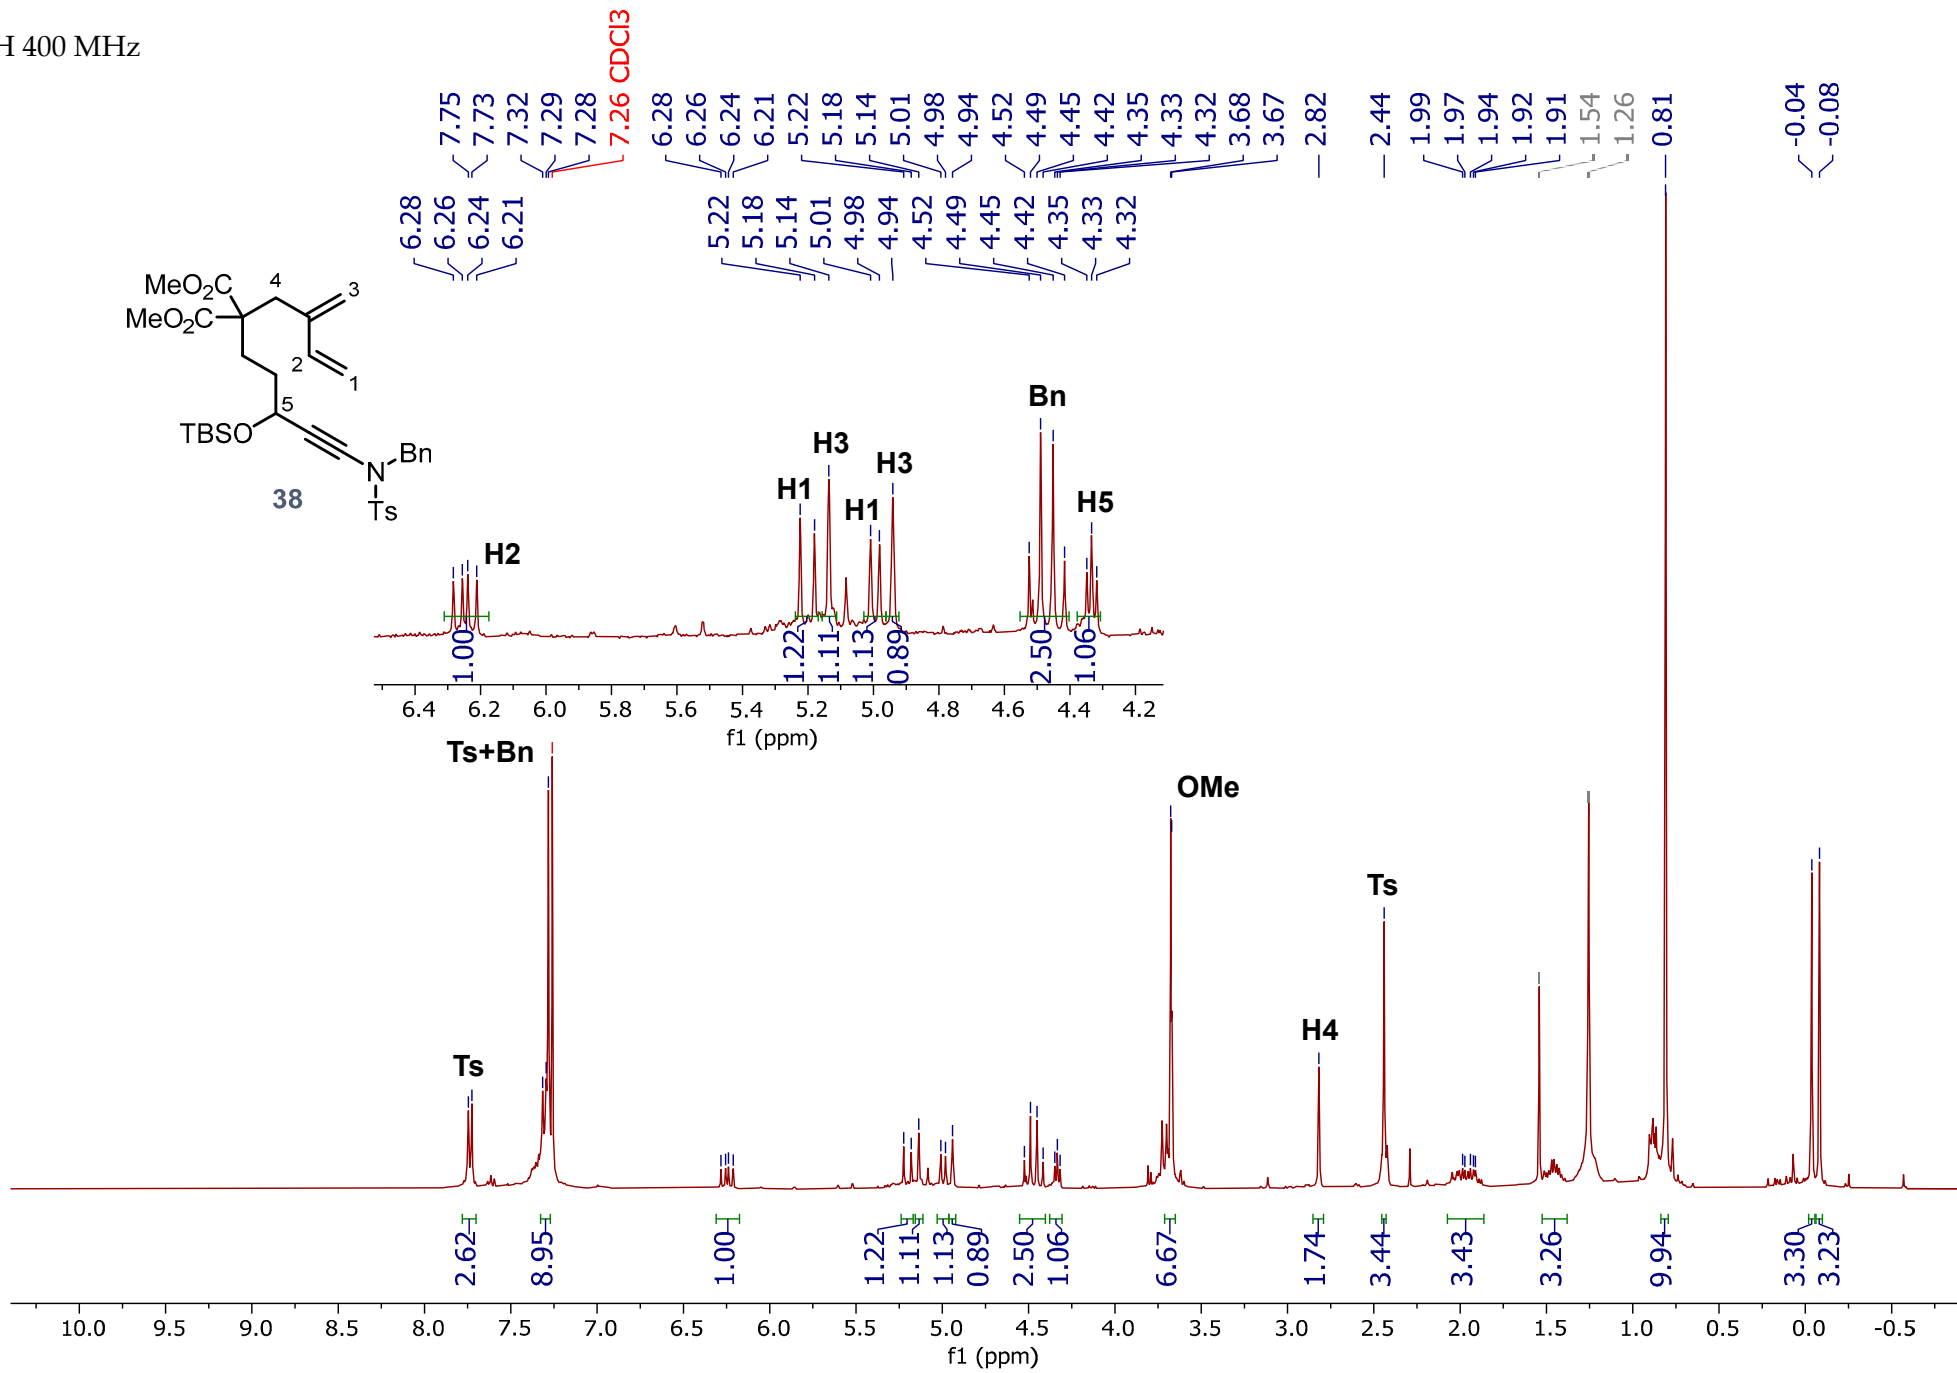

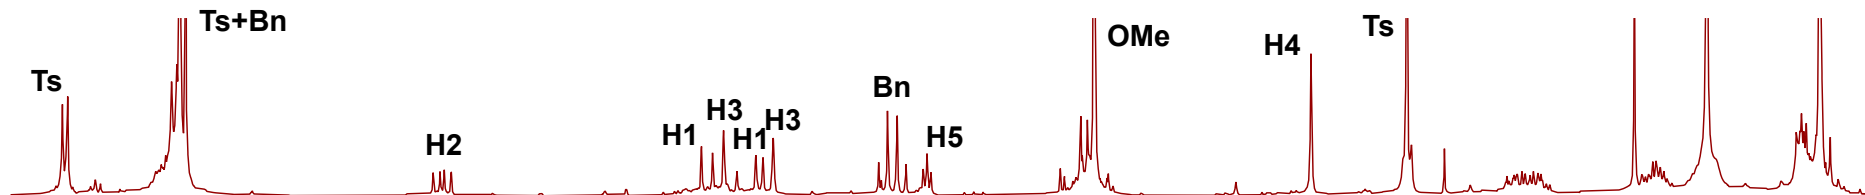

<sup>13</sup>C edited-HSQC

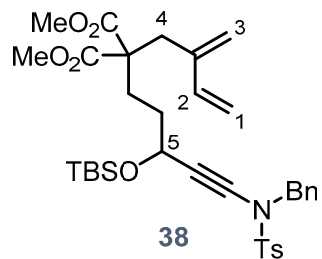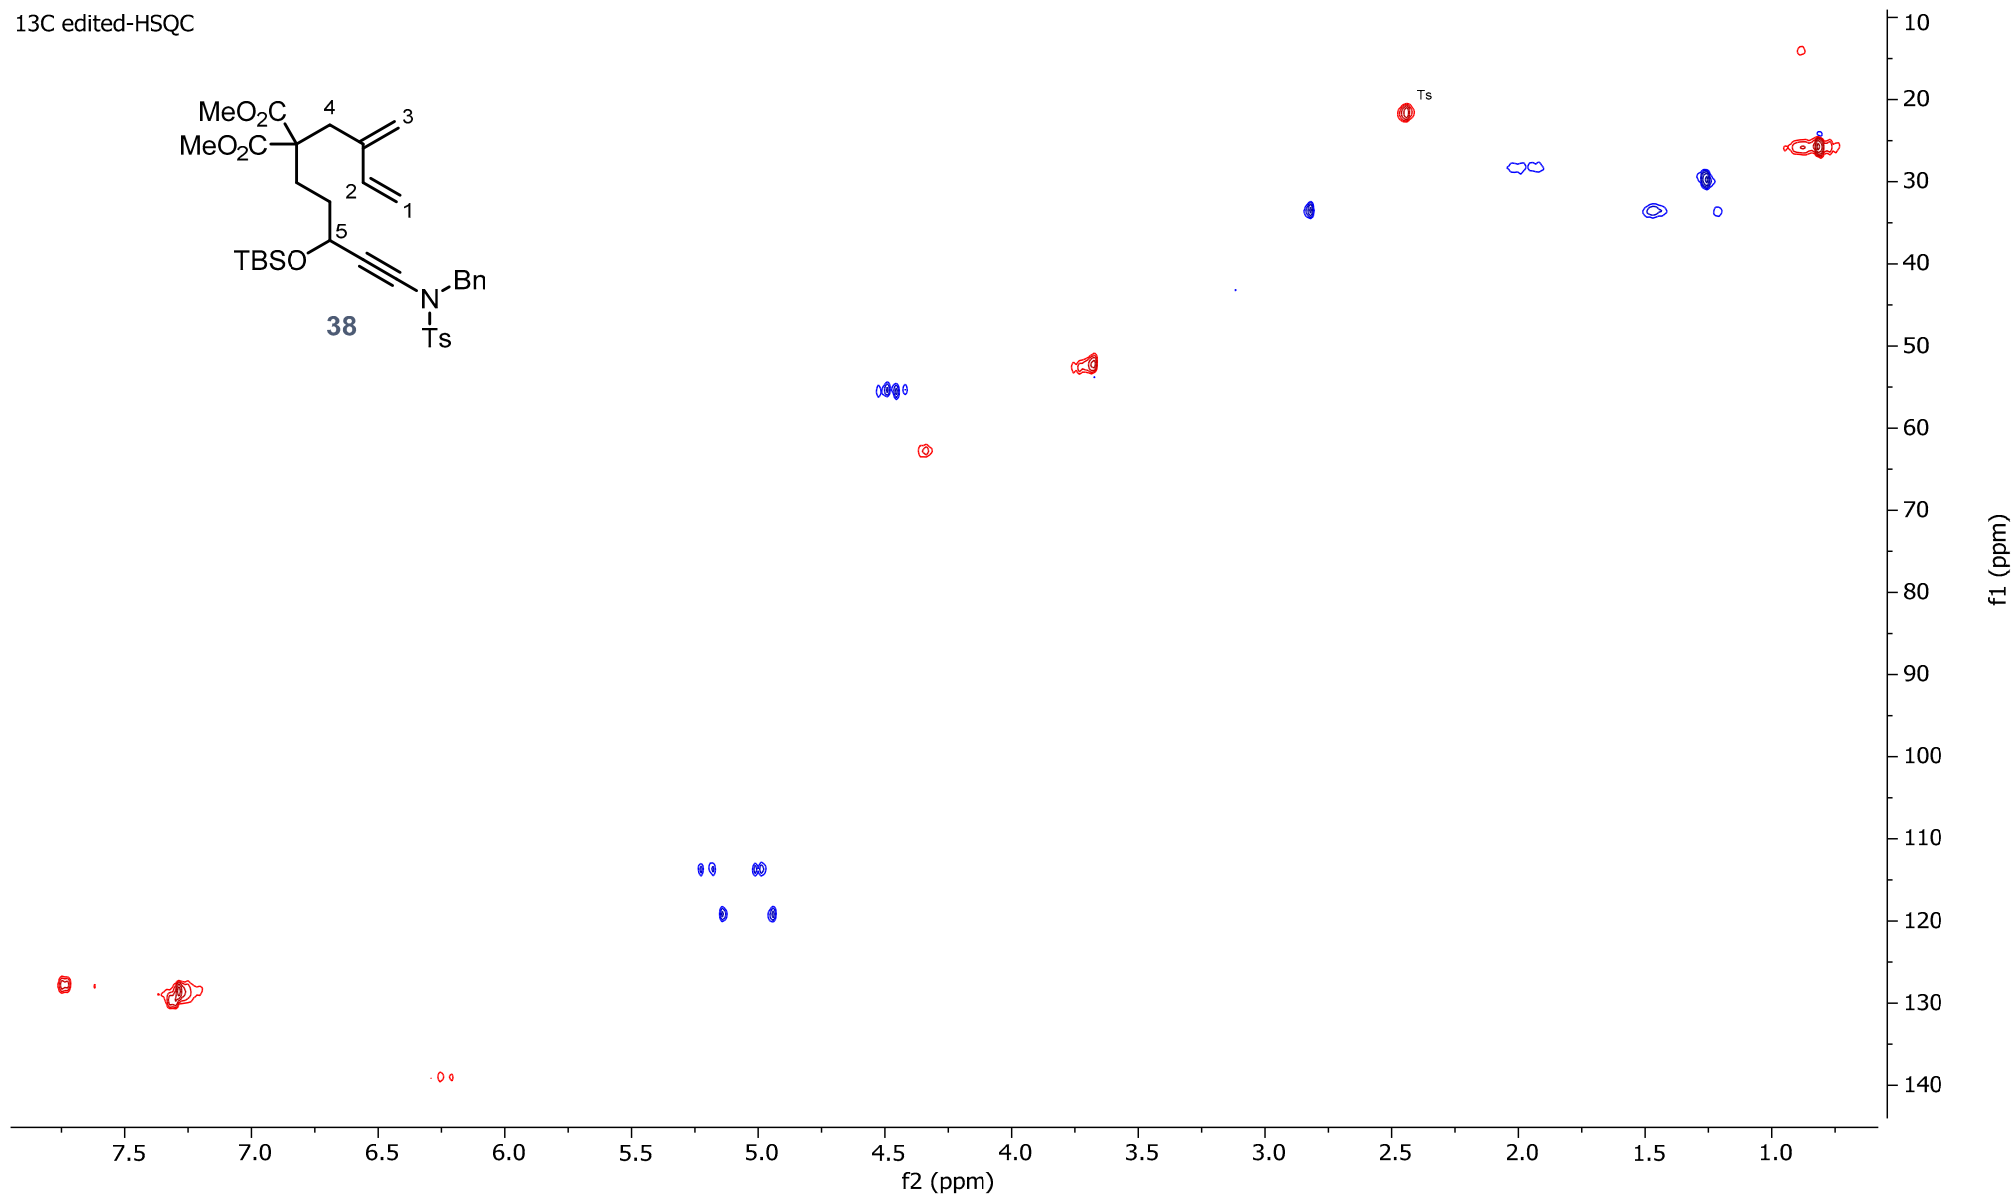



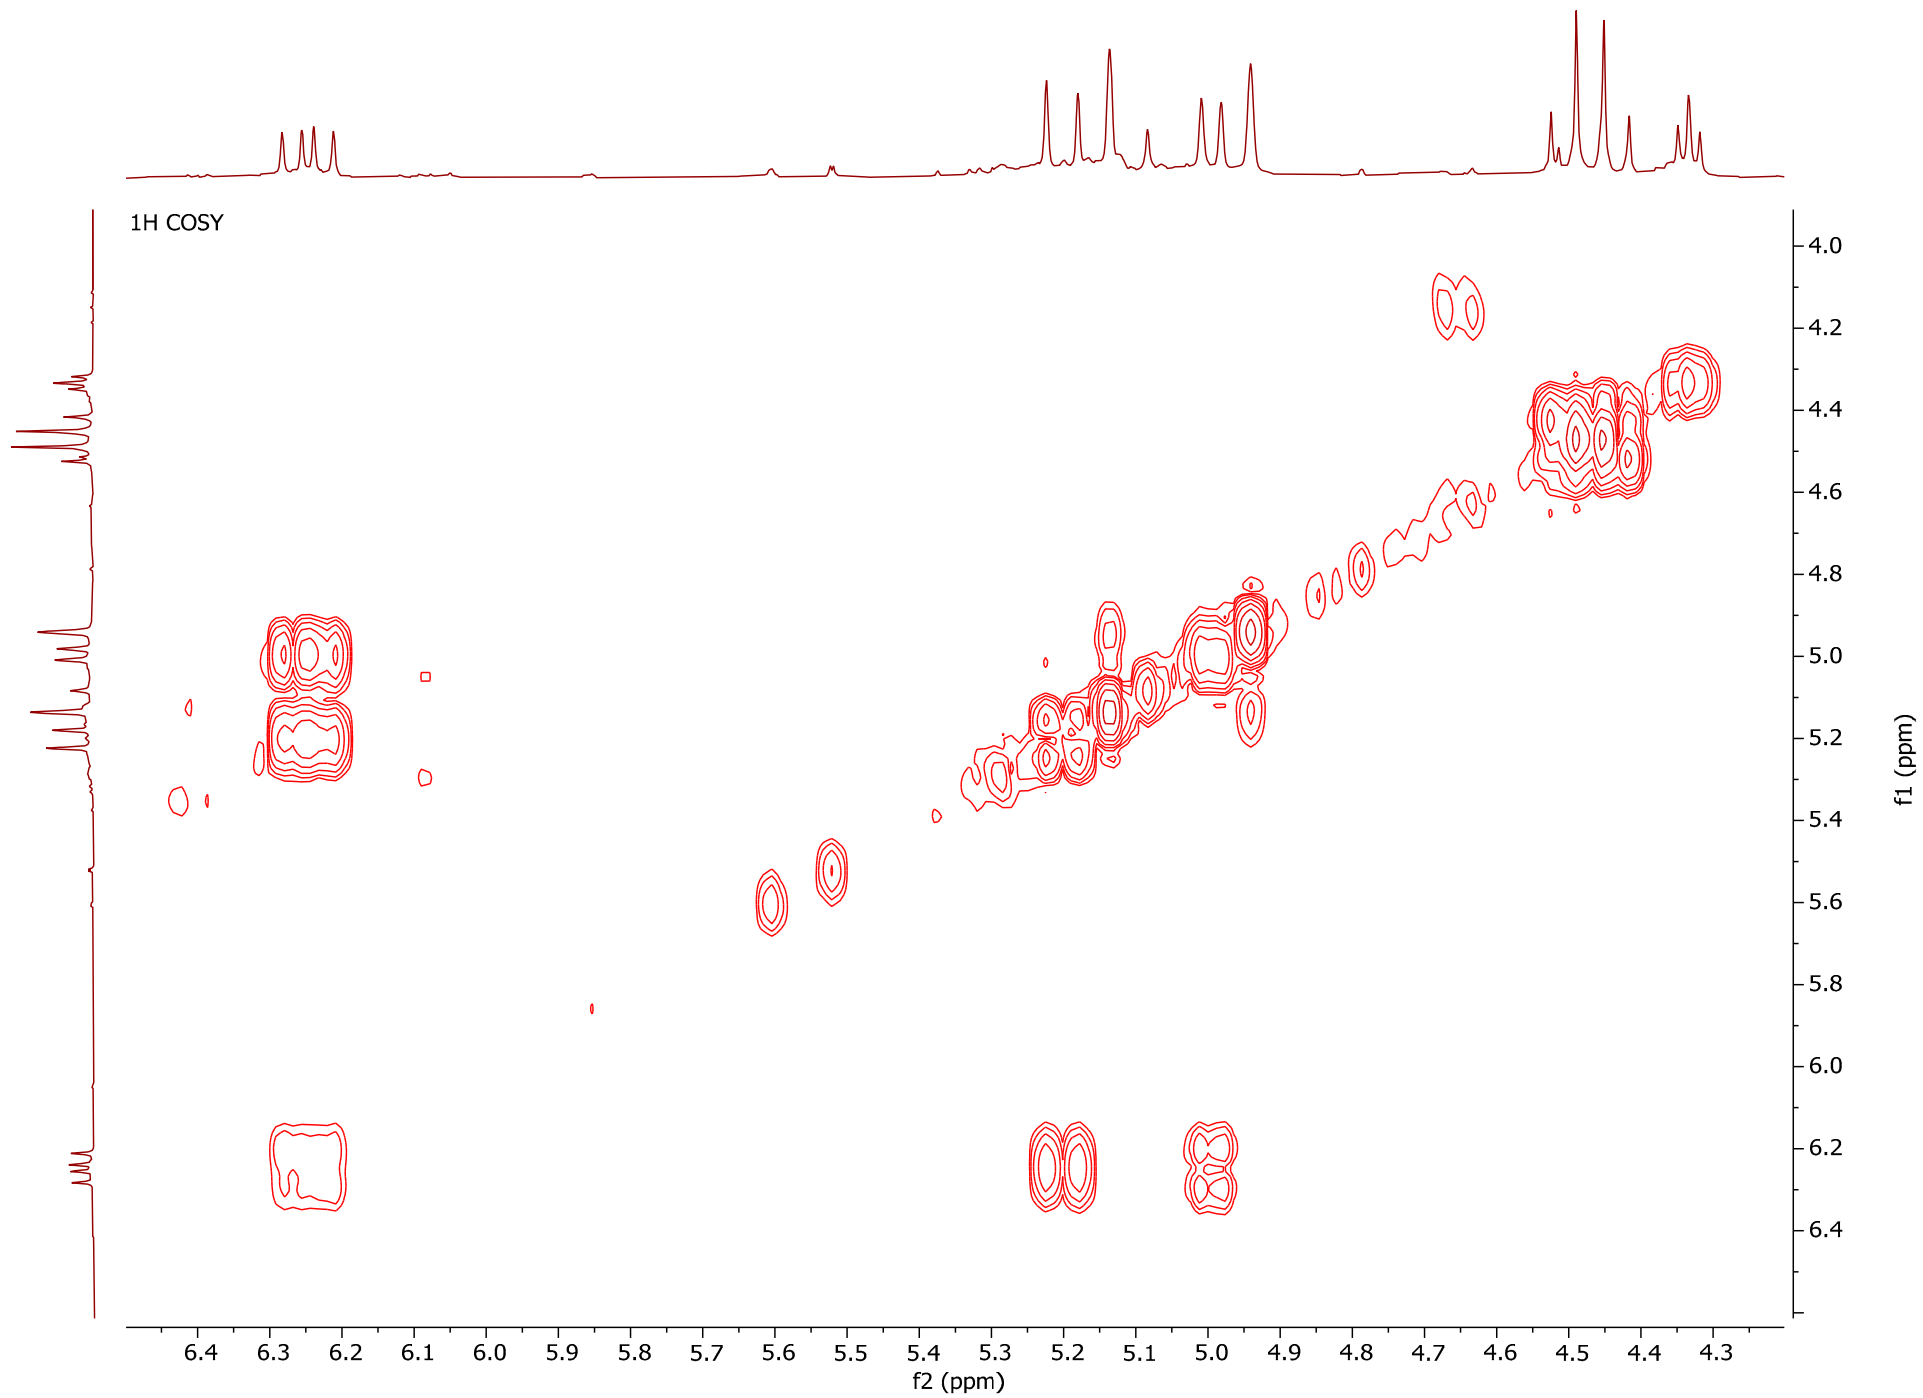

<sup>1</sup>H 500 MHz

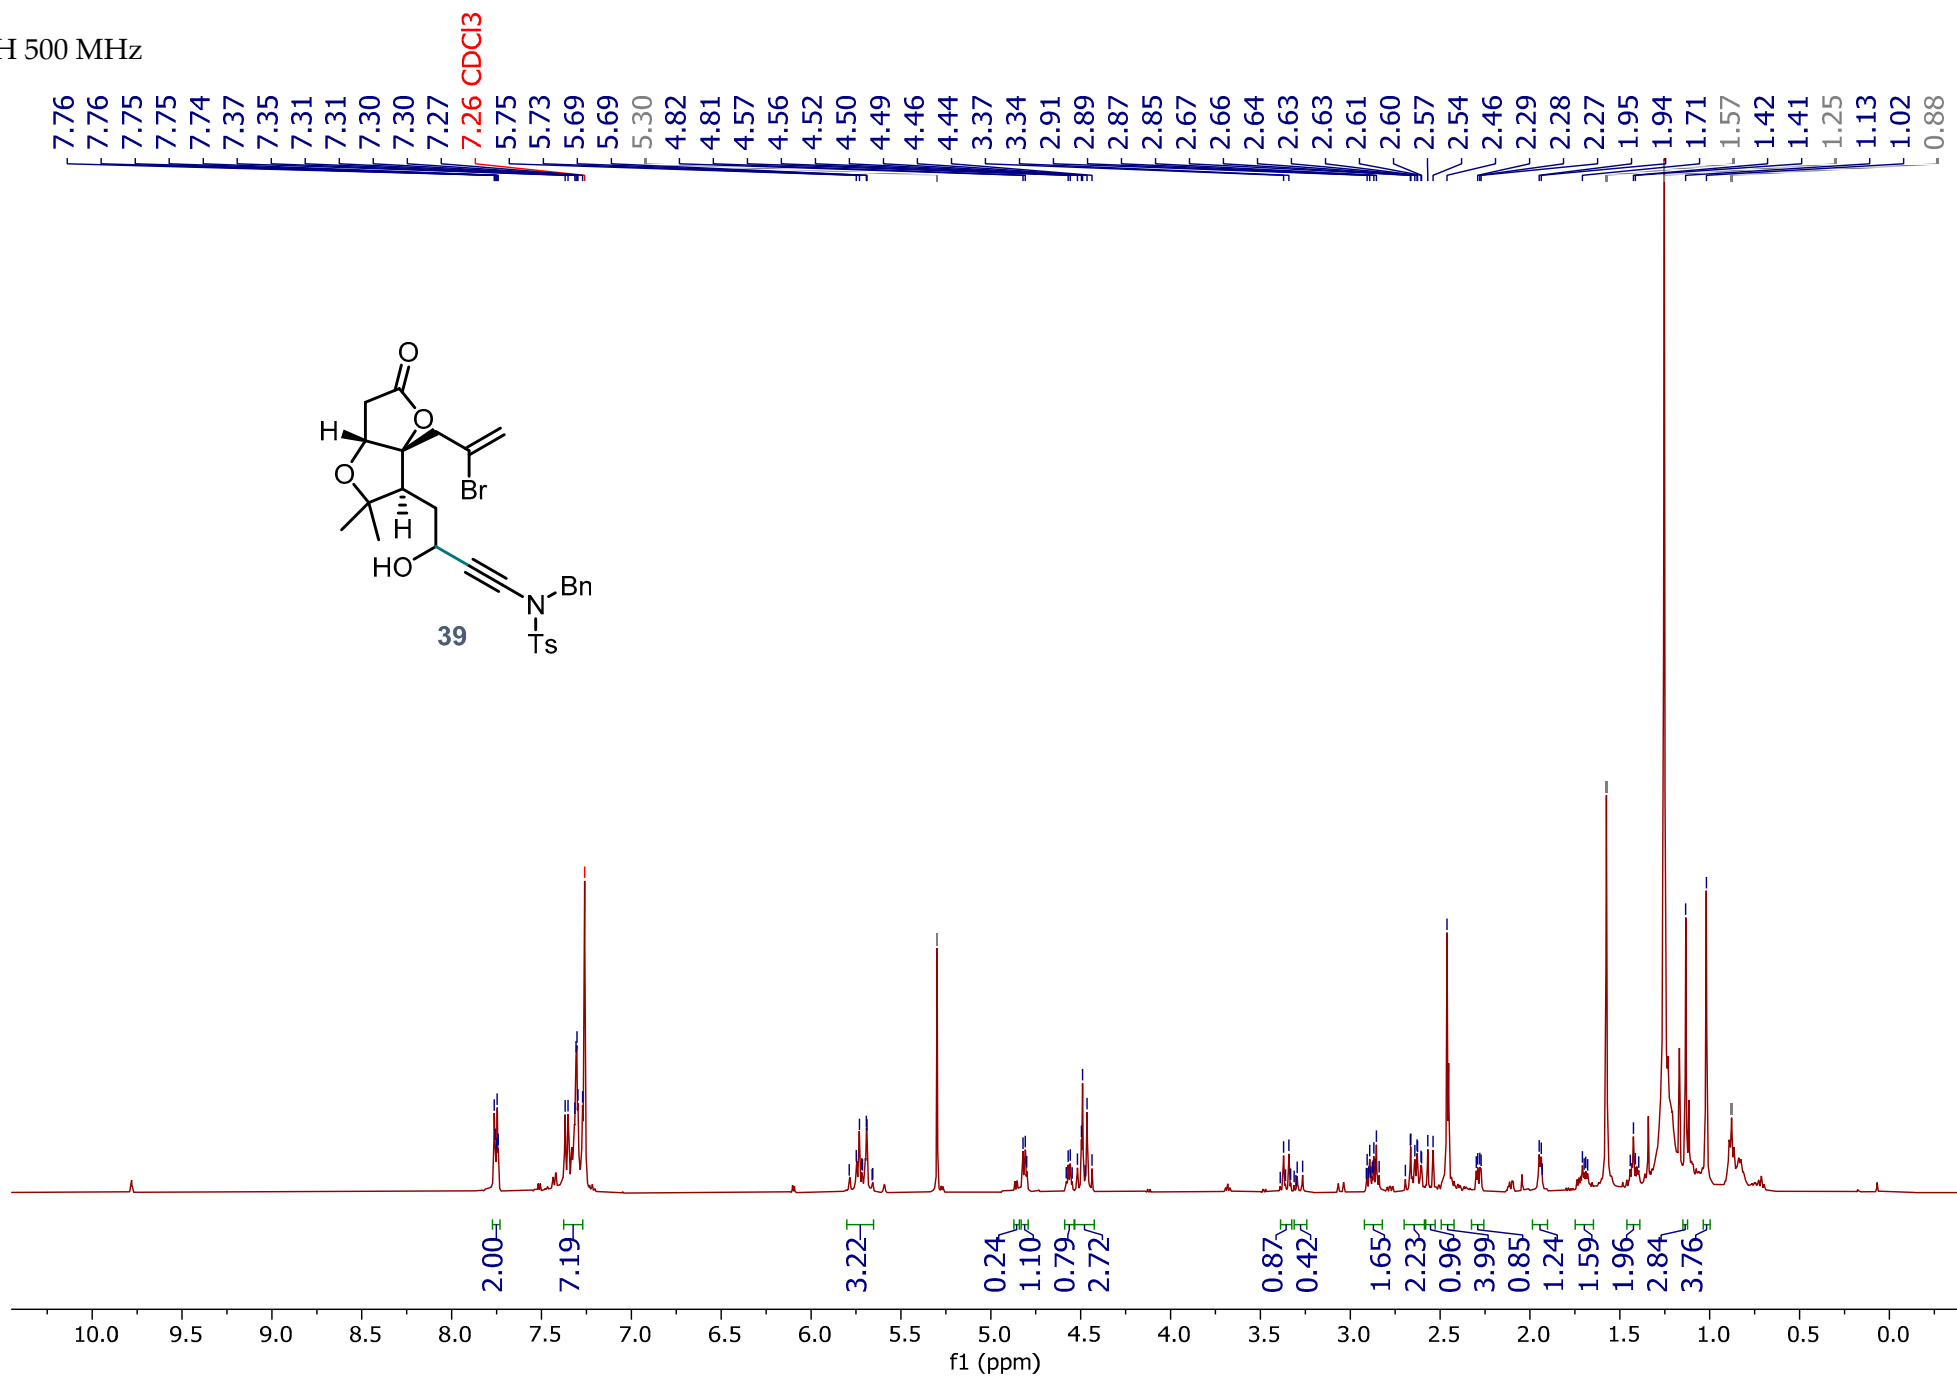

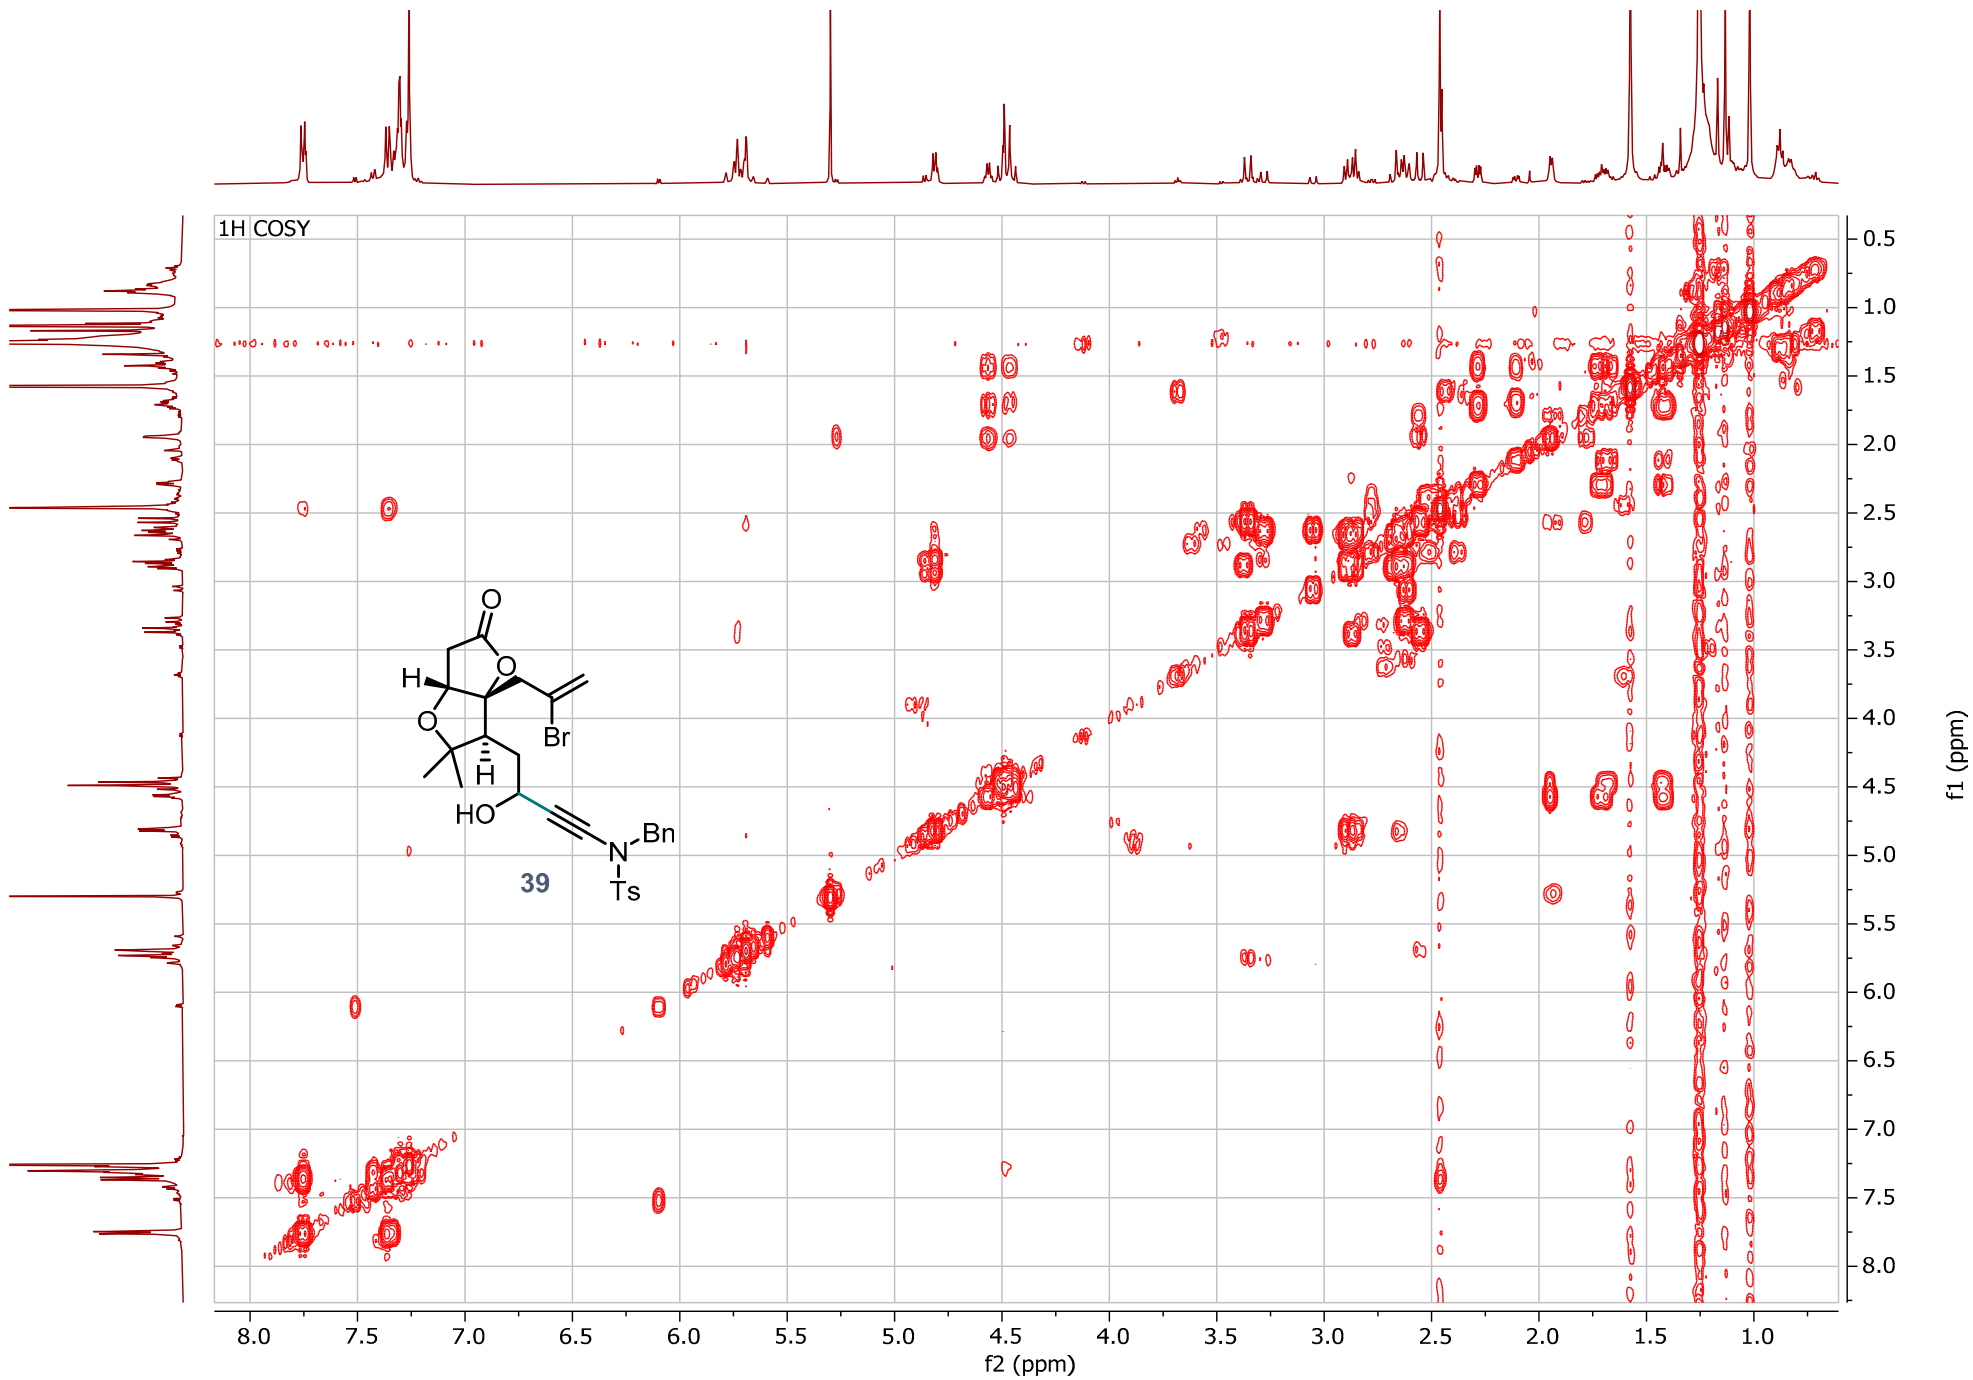

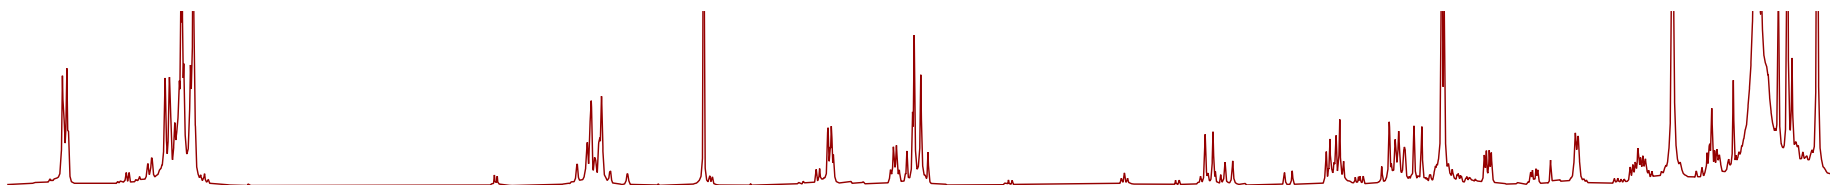

<sup>13</sup>C edited-HSQC

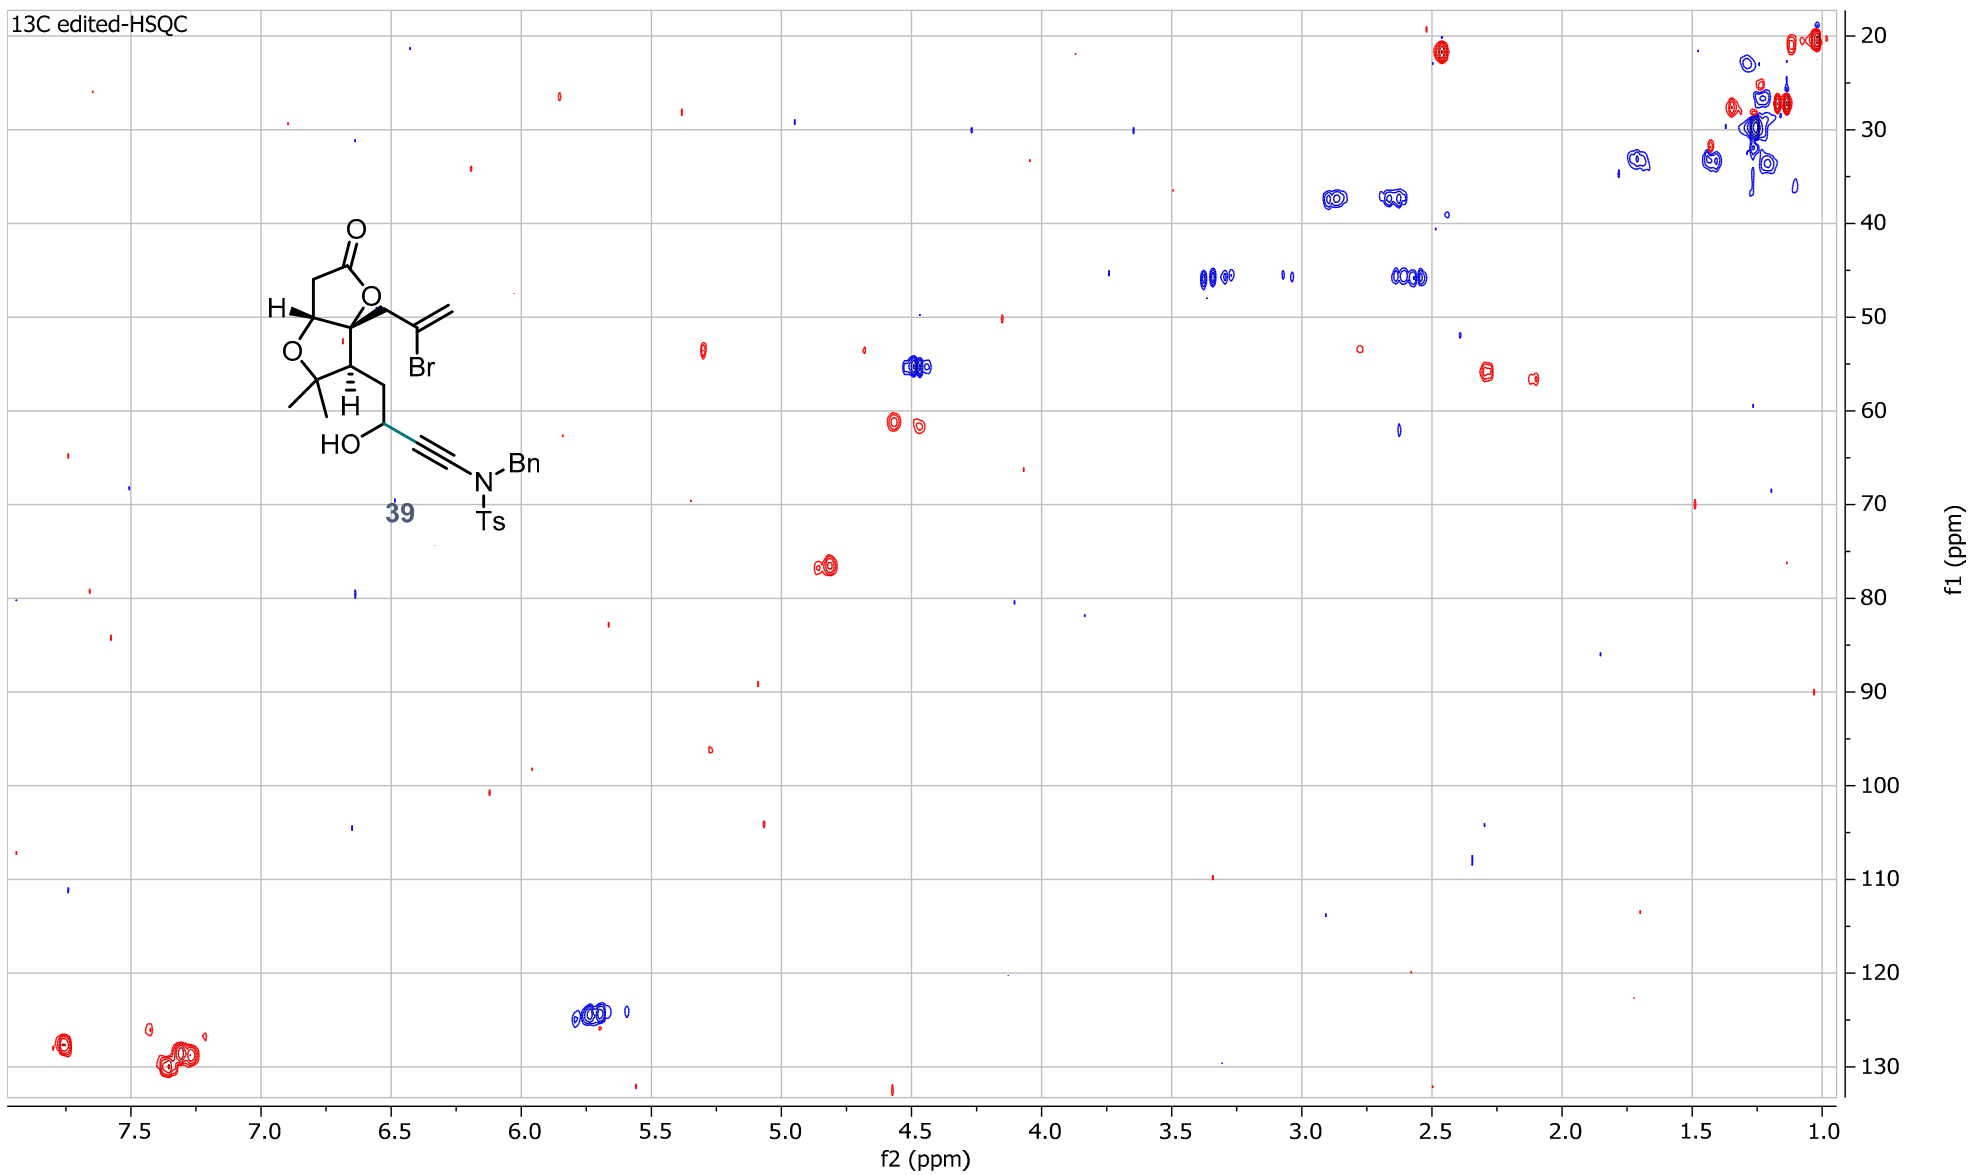

Supplement: s1 [file s1]
